# Supplementary material for: High-density SNP-based genetic map development and linkage disequilibrium assessment in Brassica napus L
Source: PubMed Central journal article supplement (PMC3600037; doi:10.1186/1471-2164-14-120), 2013-02-22

**Supplementary Figure 1:** Alignment of the four individual maps obtained for the TNDH, DYDH, AADH and AMDH populations and the integrated map (on the right). The blocks as defined by Schranz et al (2006) based on their collinearity with *A. thaliana* are indicated with the capital letters A to X on the left of each linkage groups.

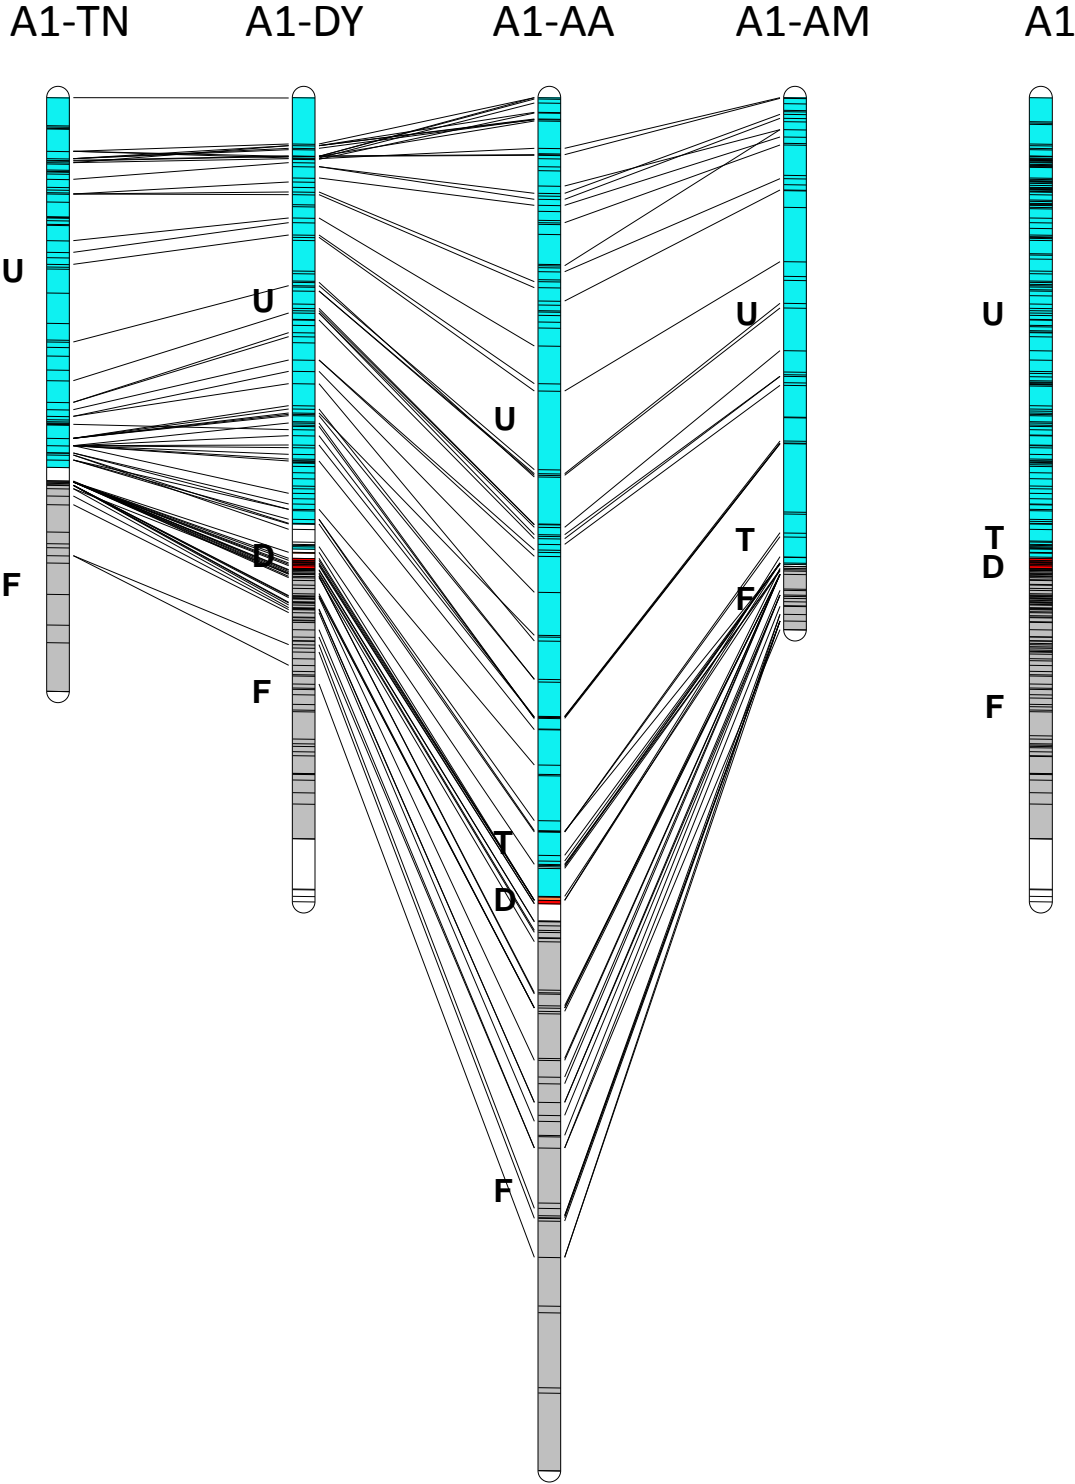

A2-TN

A2-DY

A2-AA

A2-AM

A2

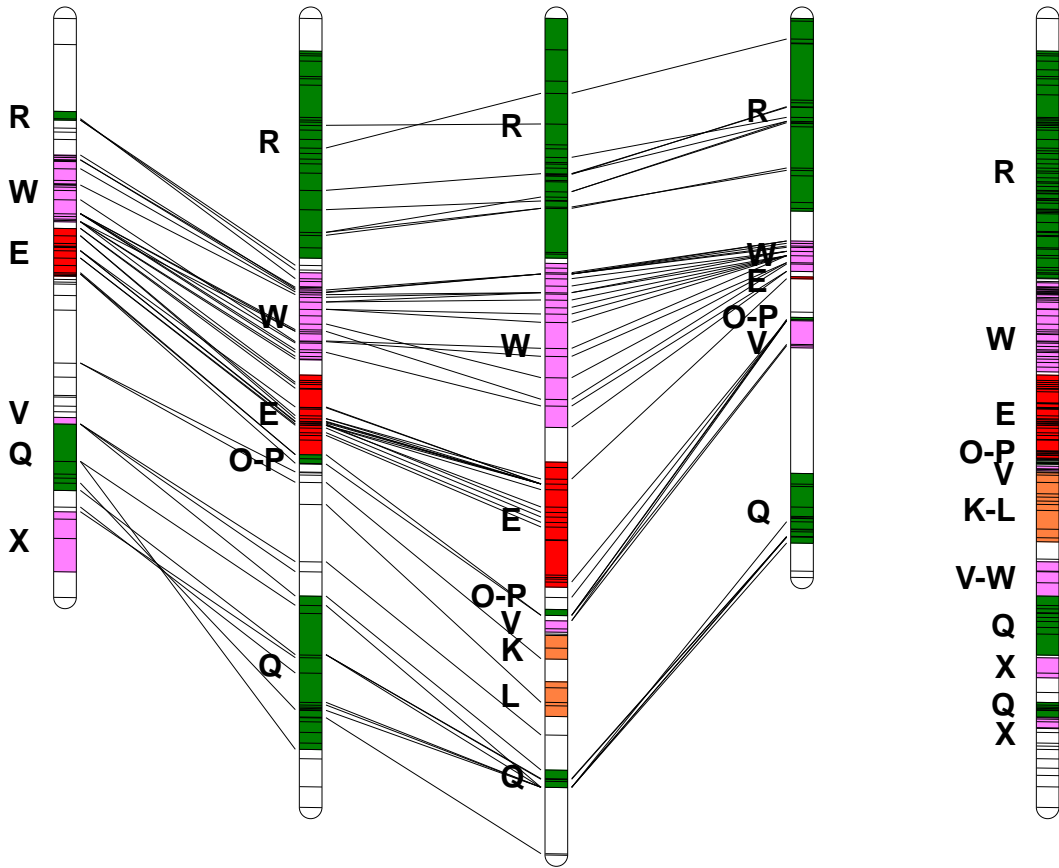

A3-TN

A3-DY

A3-AA

A3-AM

A3

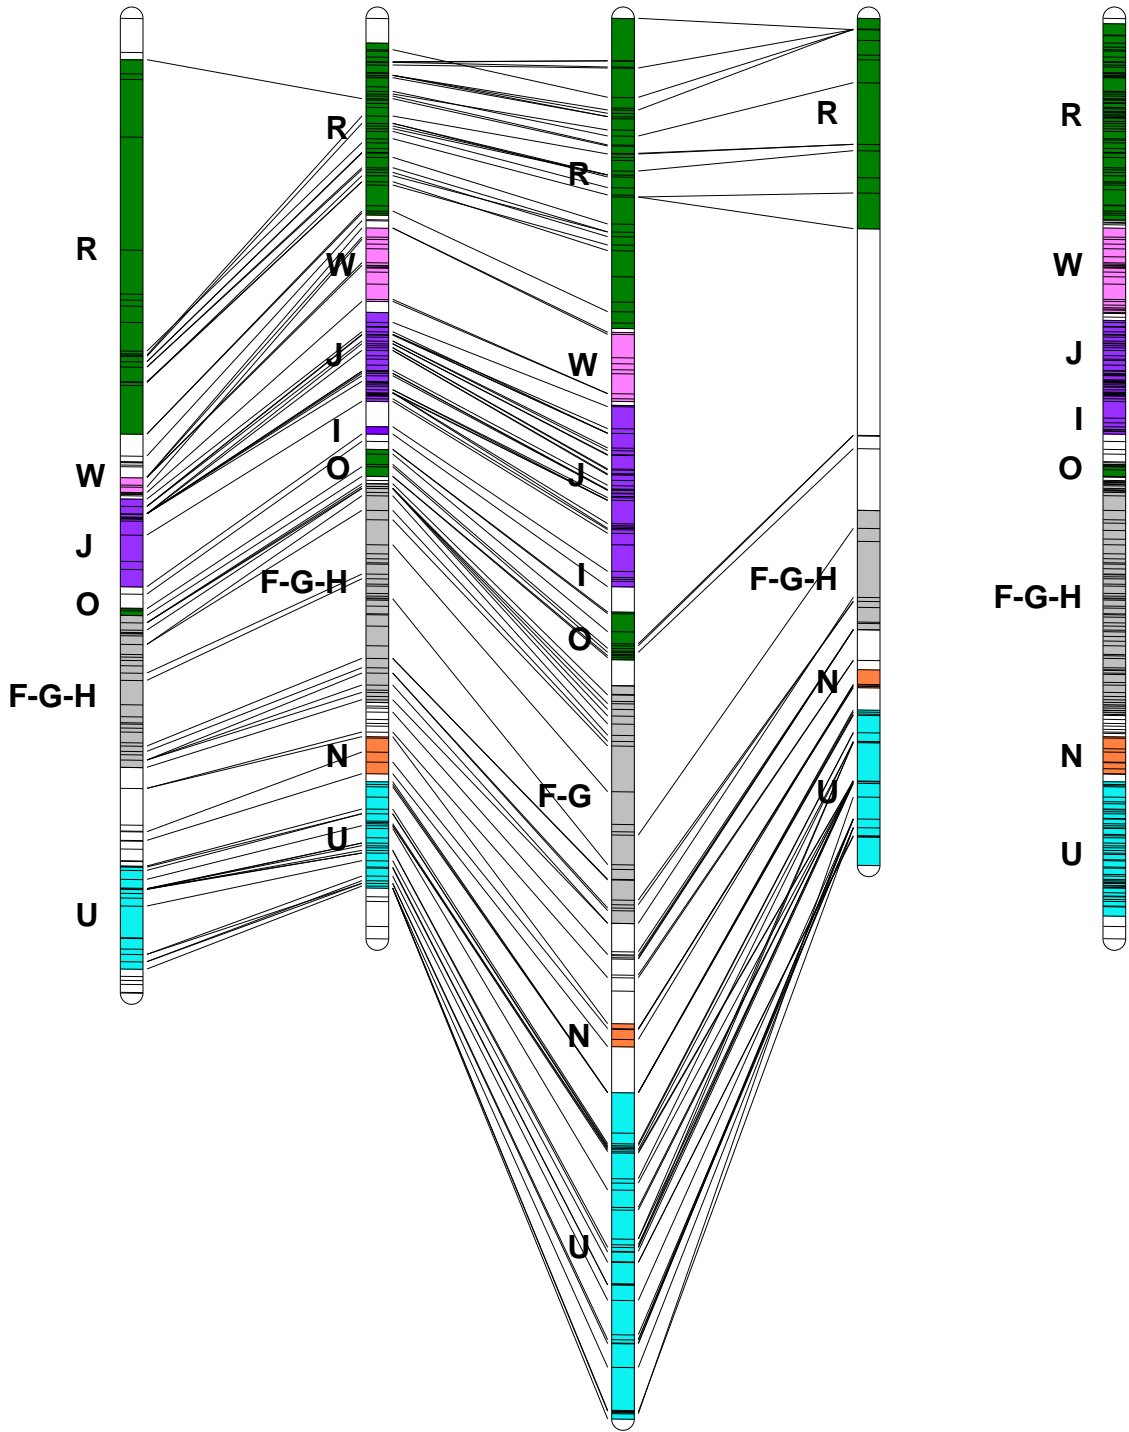

A4-TN

A4-DY

A4-AA

A4-AM

A4

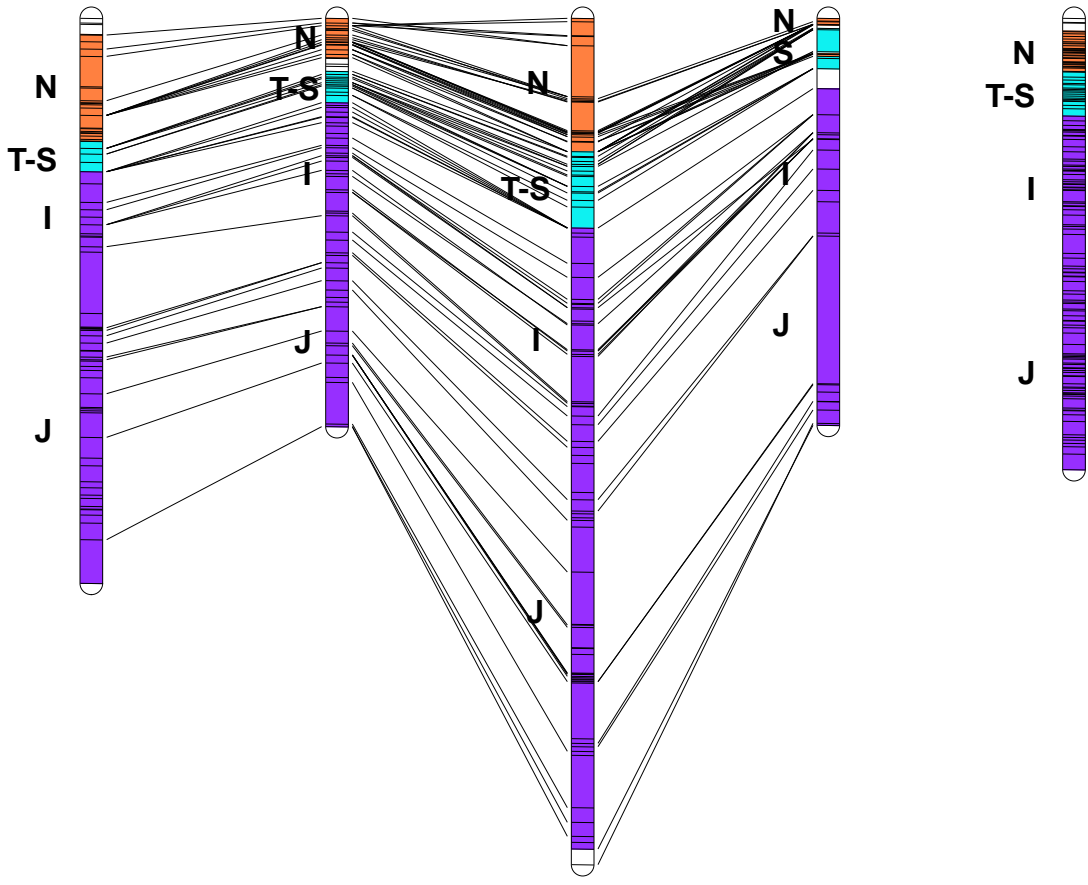

A5-TN

A5-DY

A5-AA

A5-AM

A5

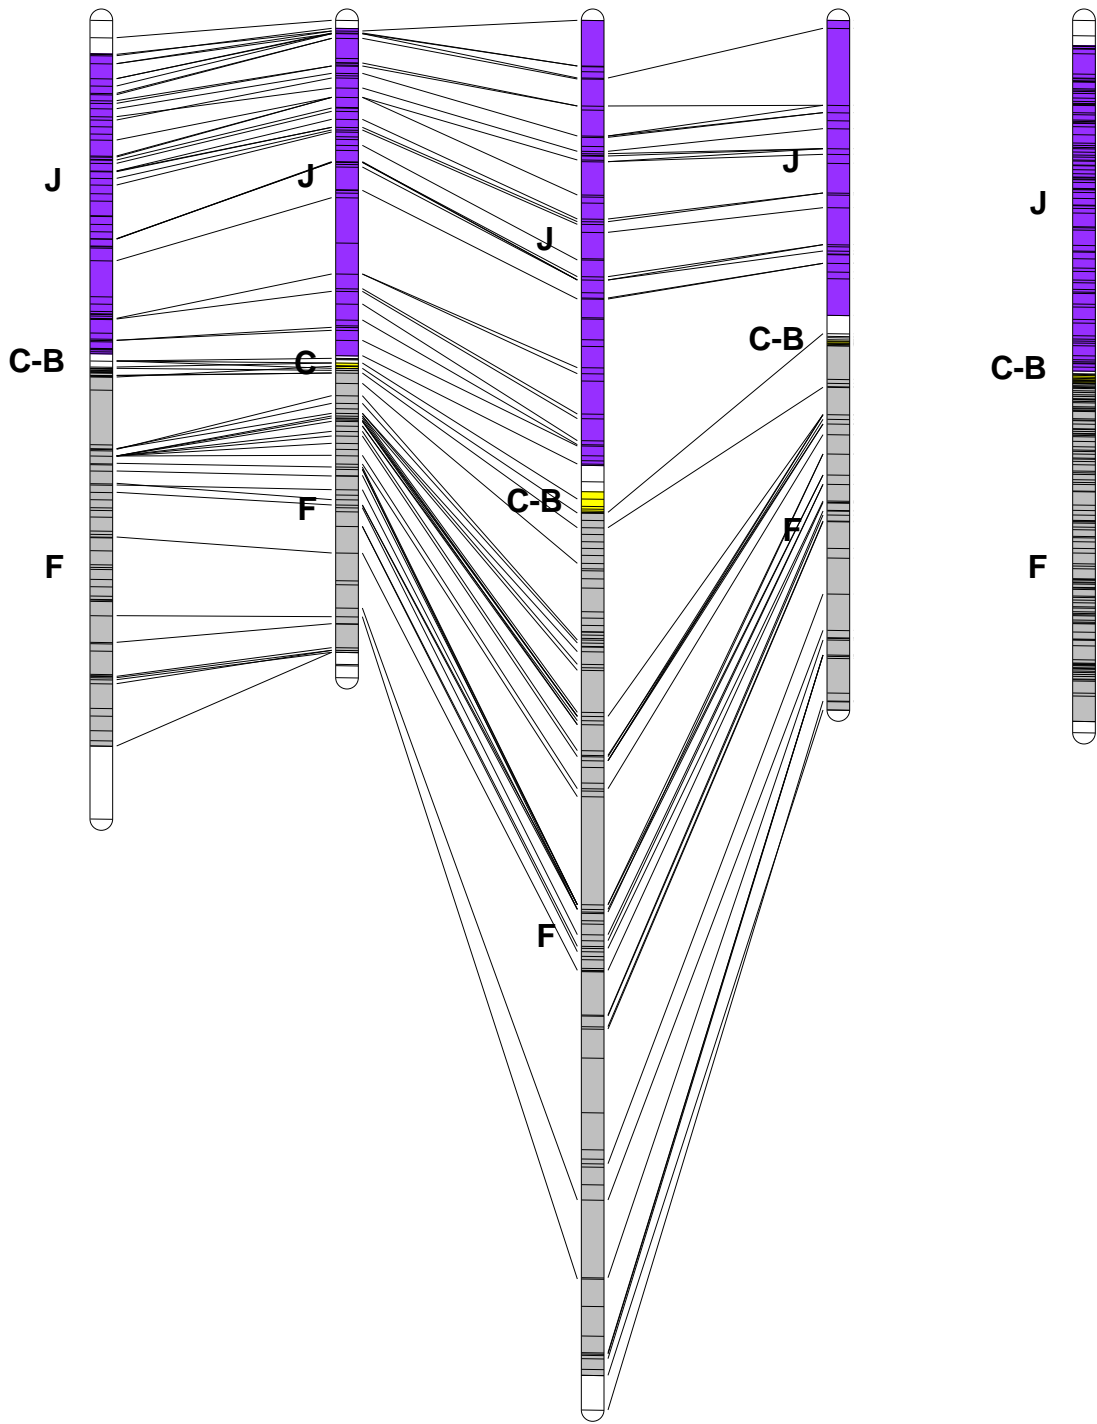

A6-TN

A6-DY

A6-AA

A6-AM

A6

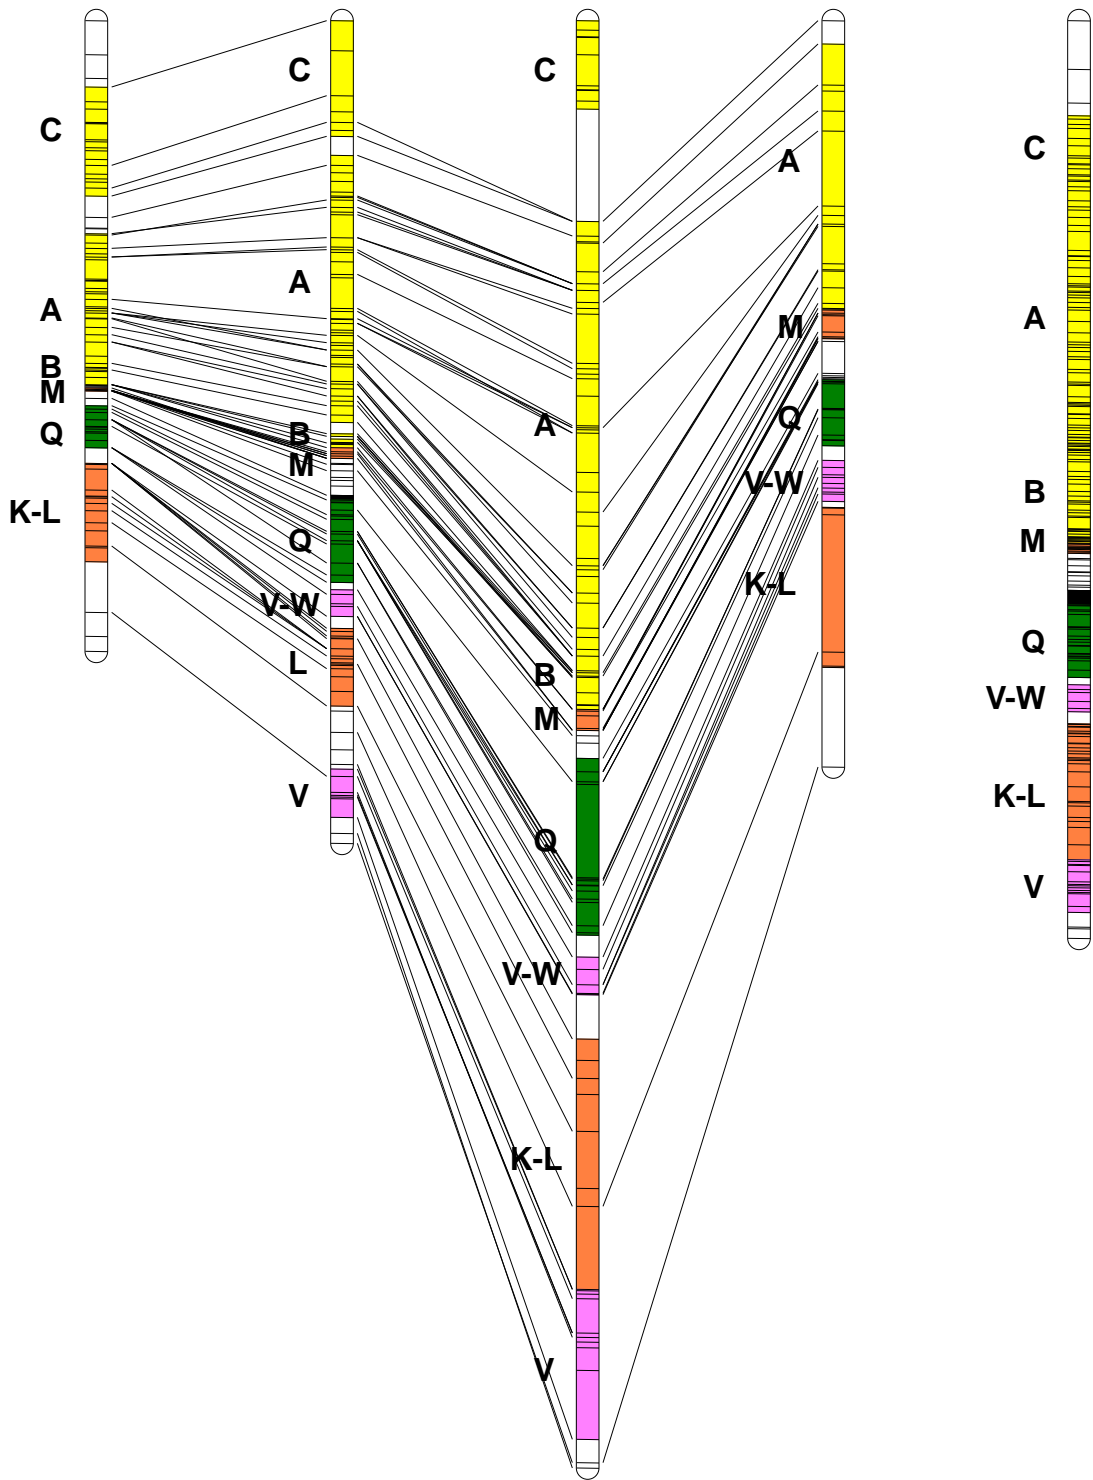

A7-TN

A7-DY

A7-AA

A7-AM

A7

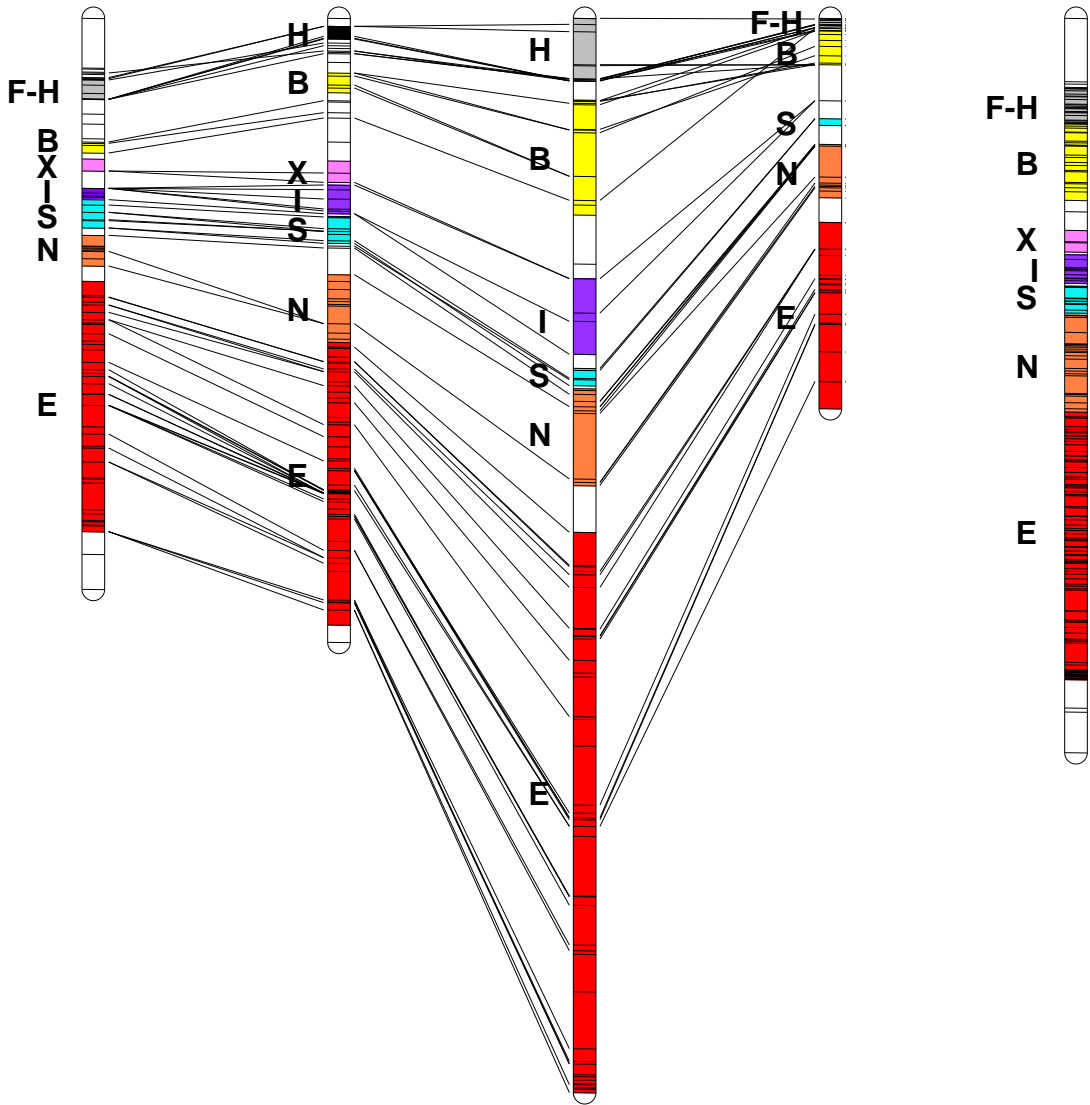

A8-TN

A8-DY

A8-AA

A8-AM

A8

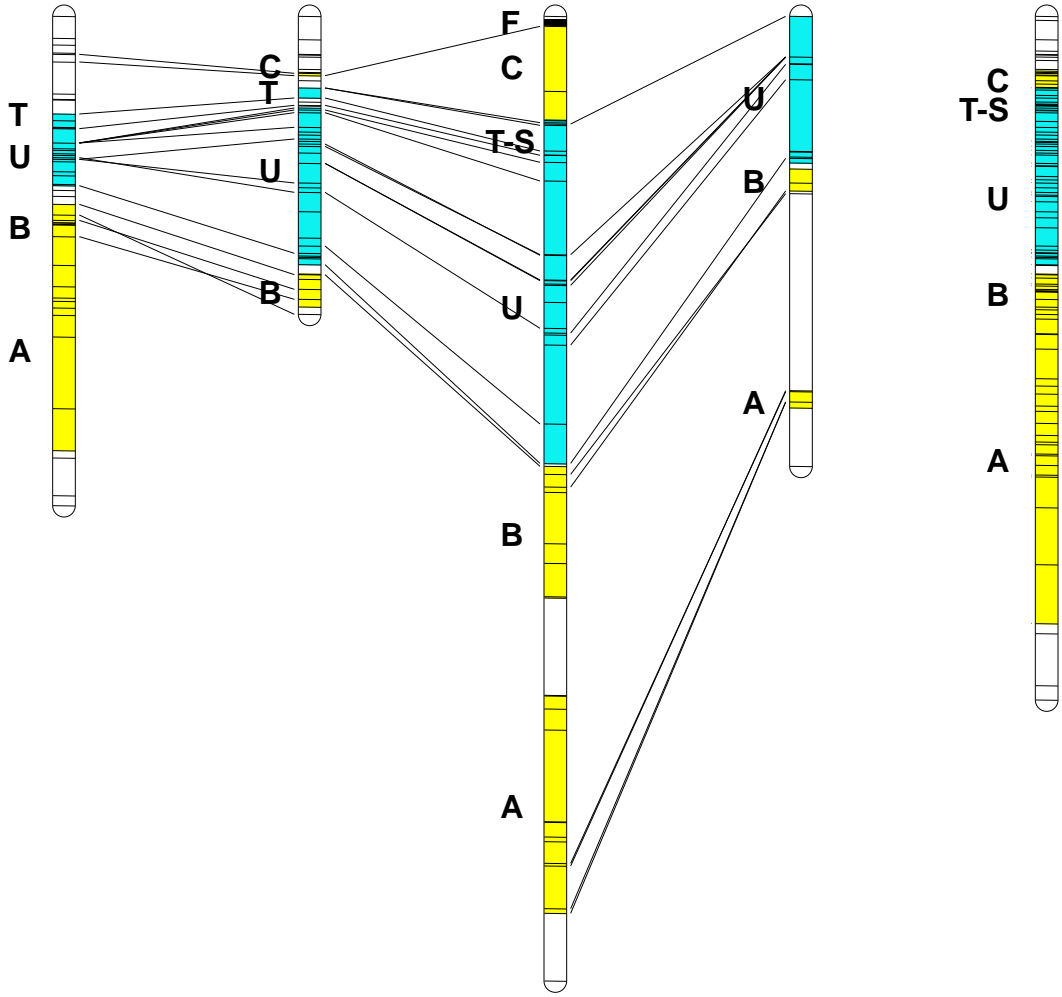



A9-TN

A9-DY

A9-AA

A9-AM

A9

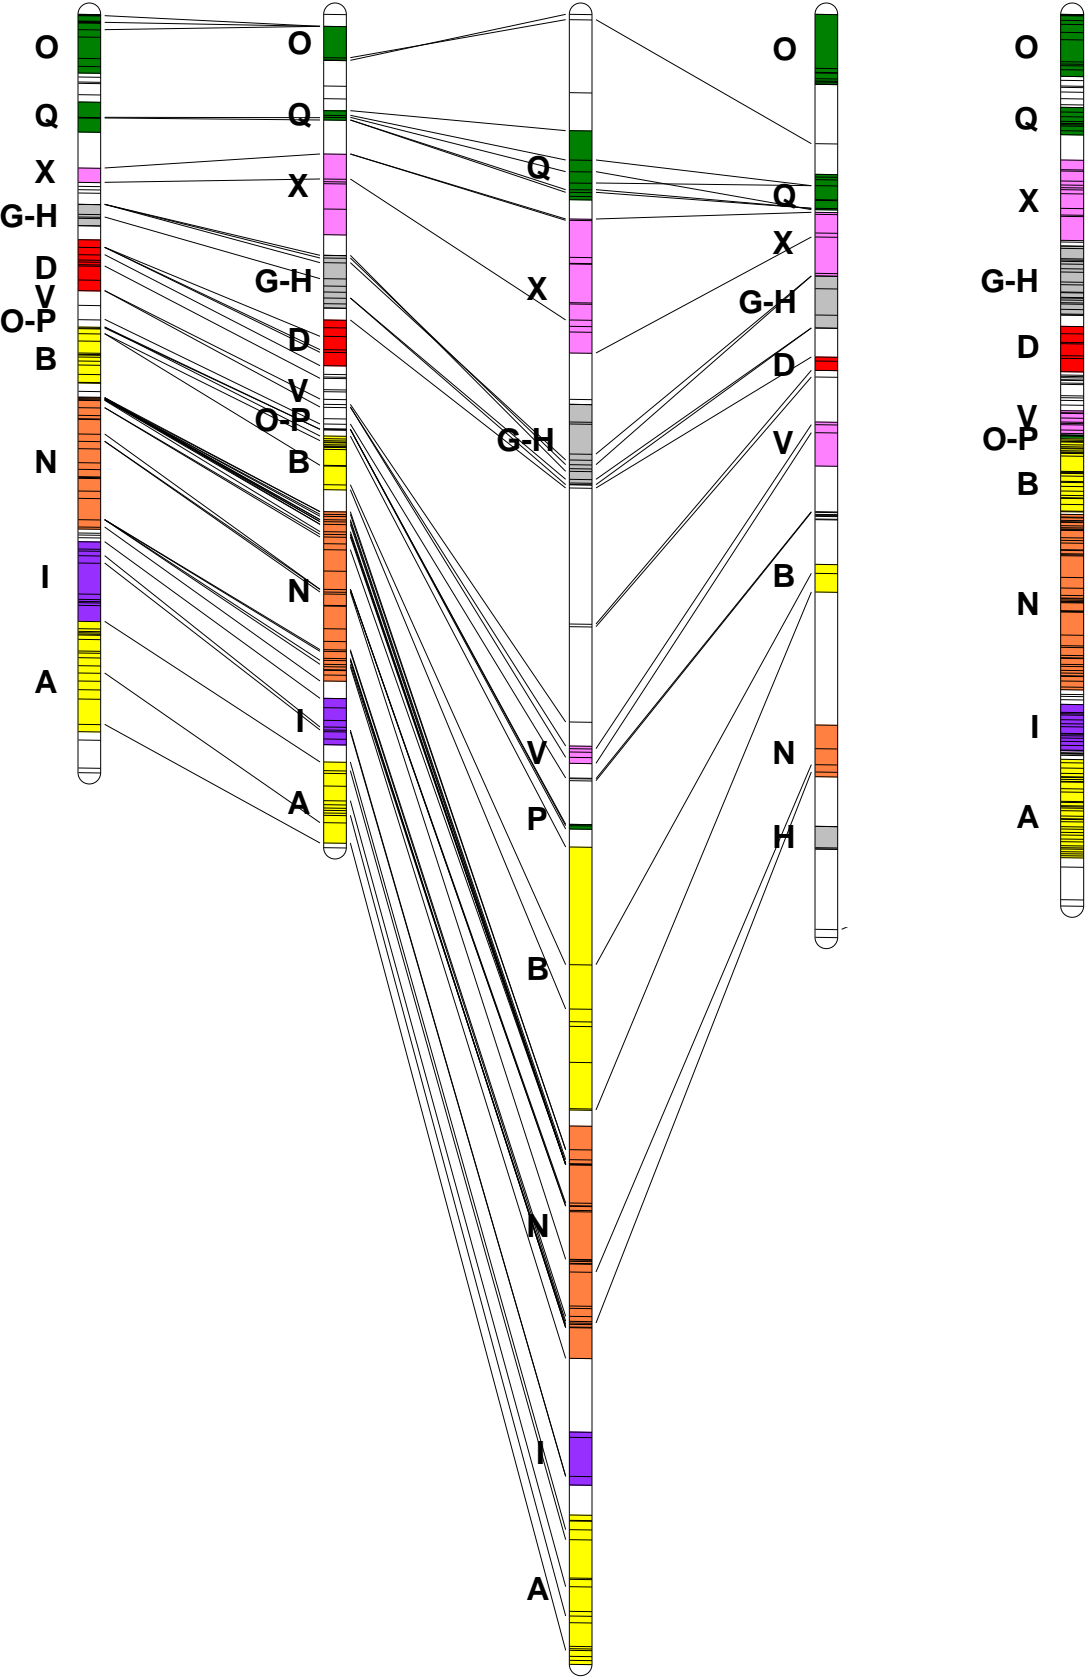

A10-TN

A10-DY

A10-AA

A10-AM

A10

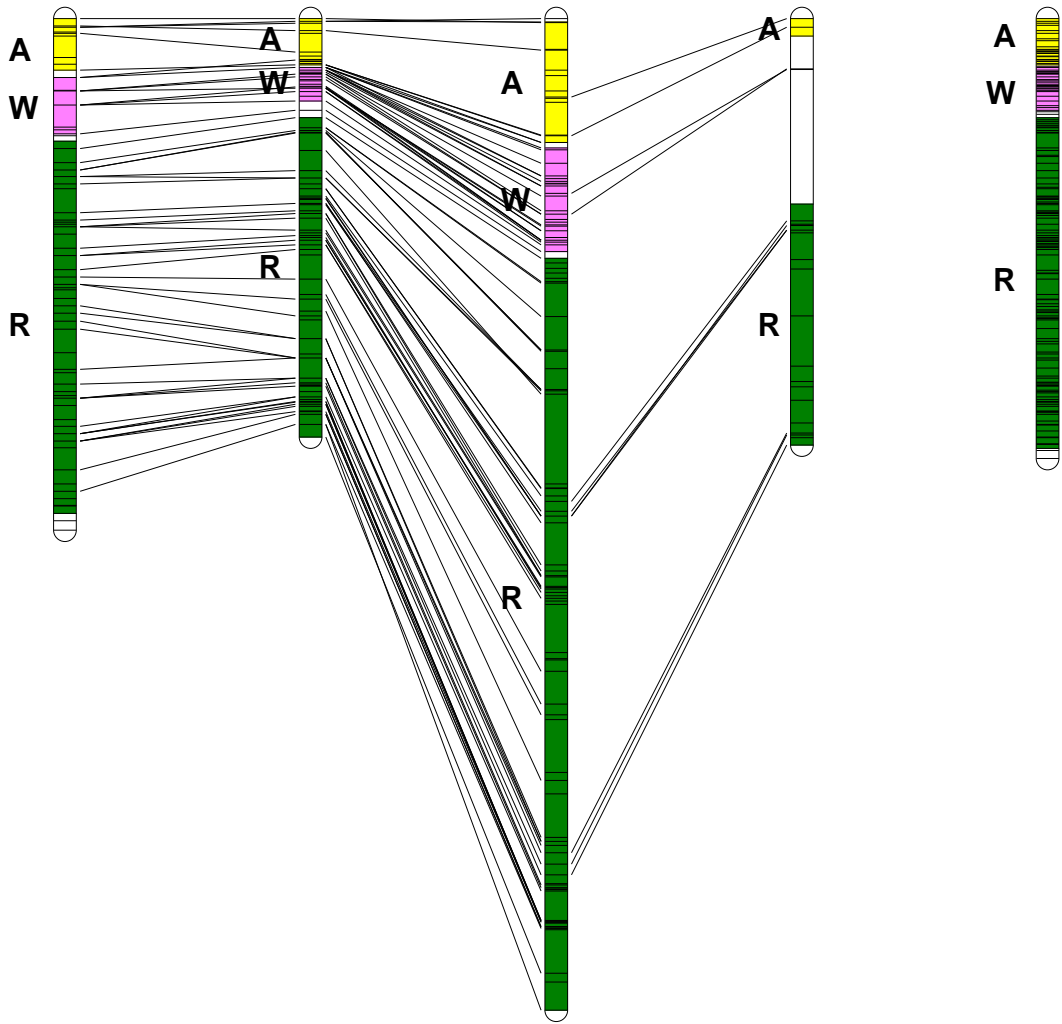

C1-TN

C1-DY

C1-AA

C1-AM

C1

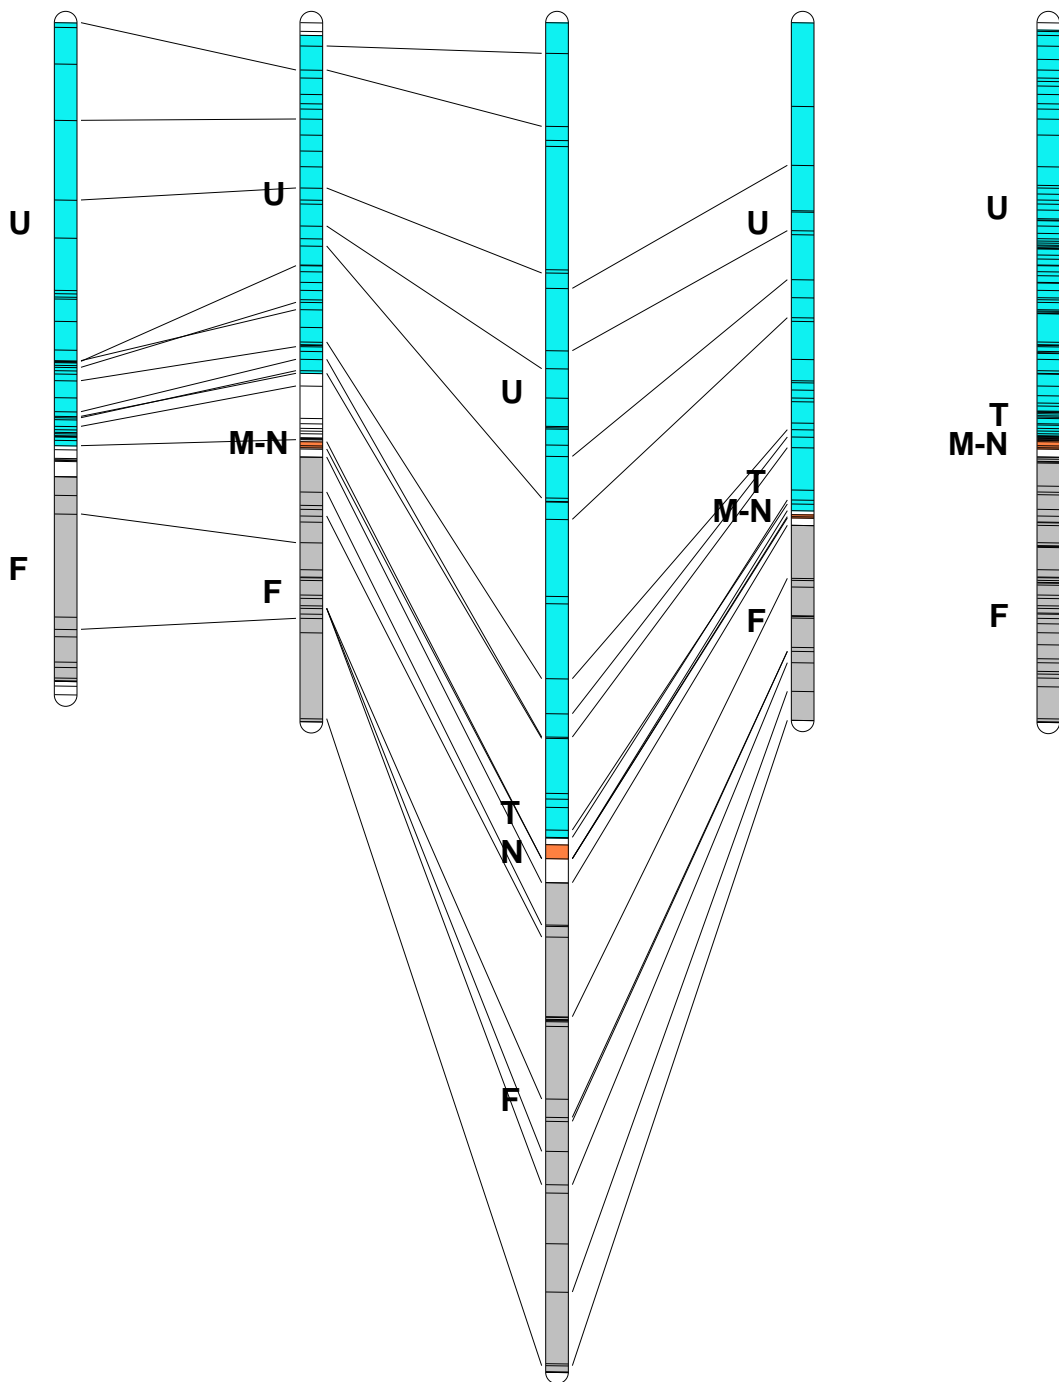

C2-TN

C2-DY

C2-AA

C2-AM

C2

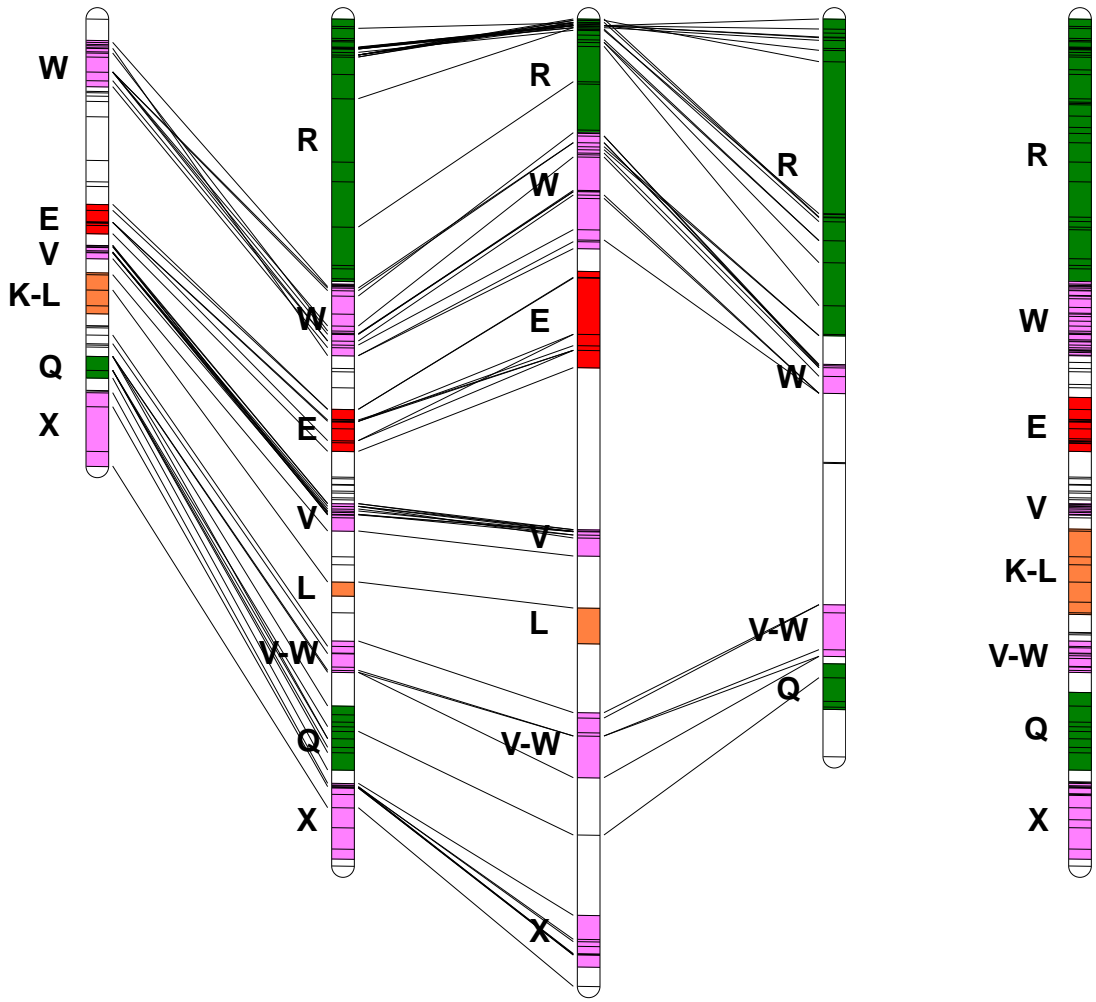

C3-TN

C3-DY

C3-AA

C3-AM

C3

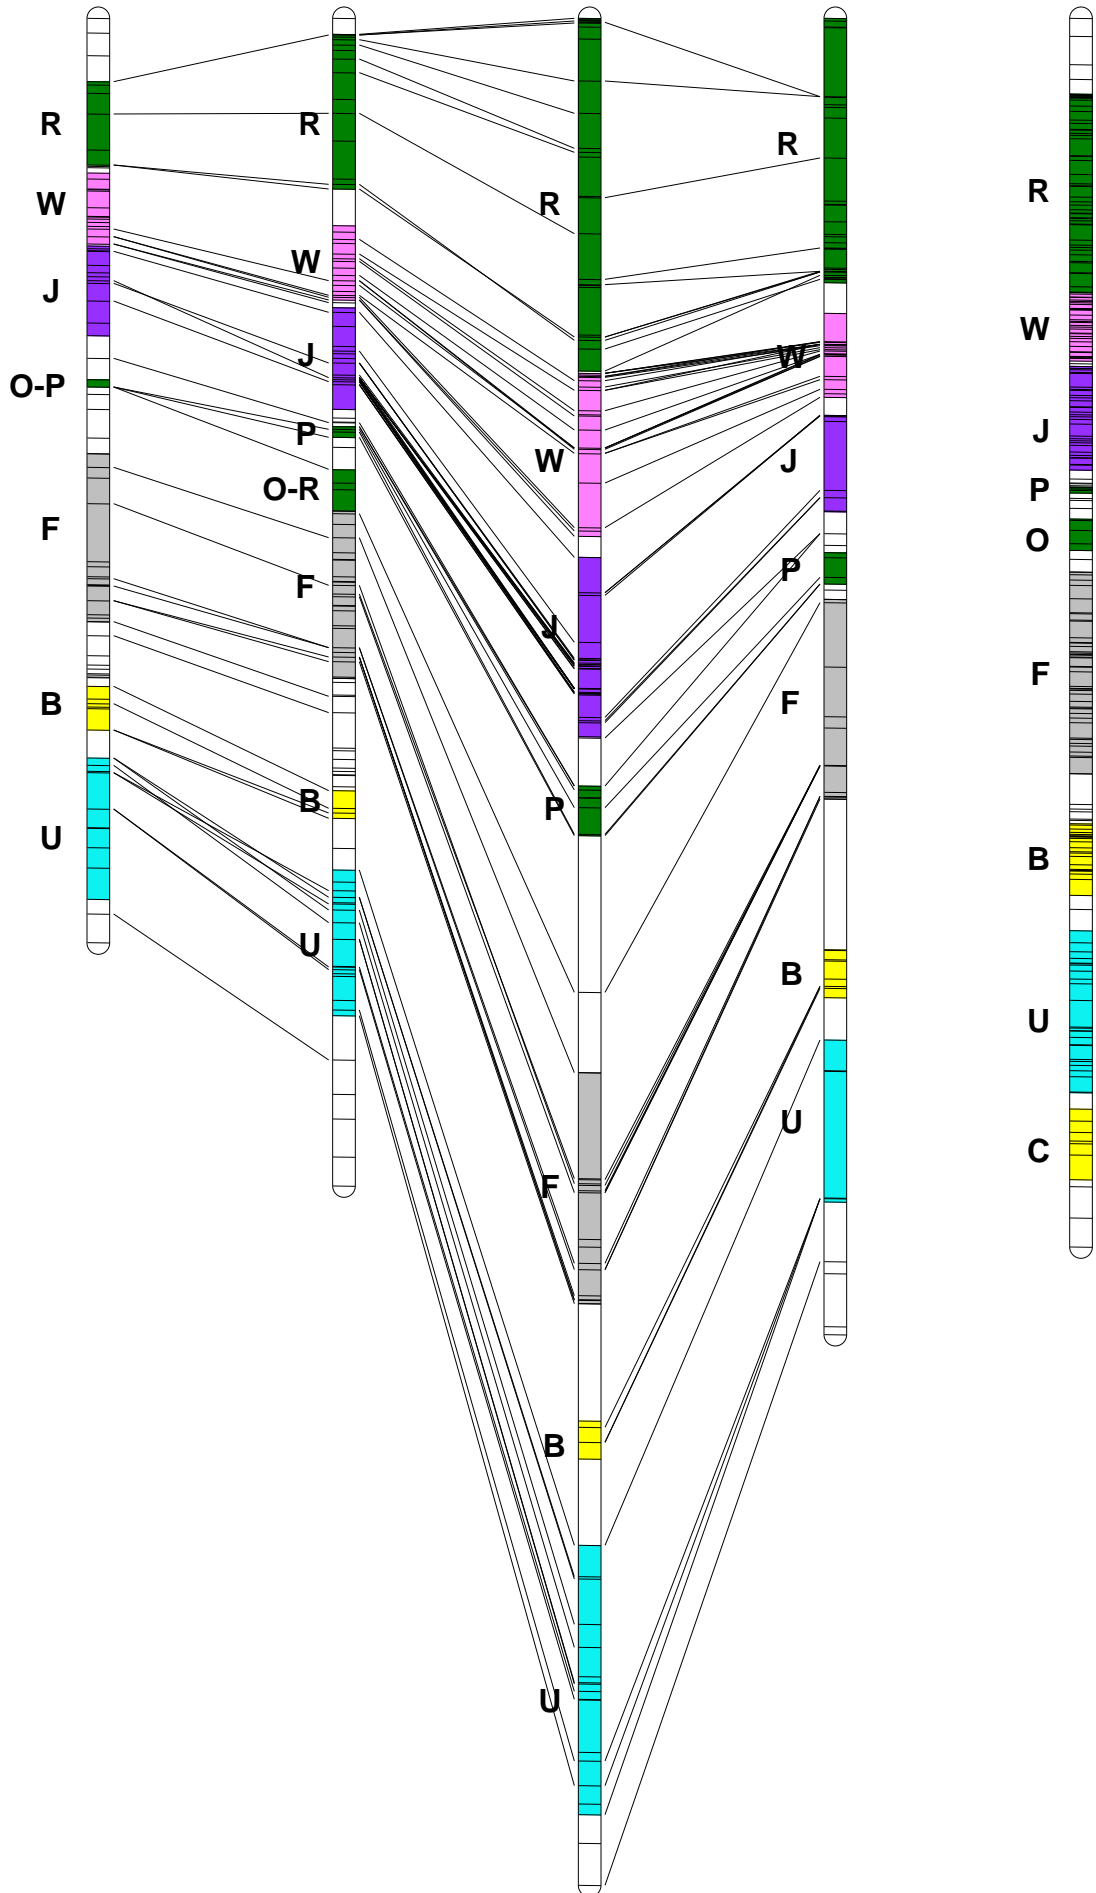

C4-TN

C4-DY

C4-AA

C4-AM

C4

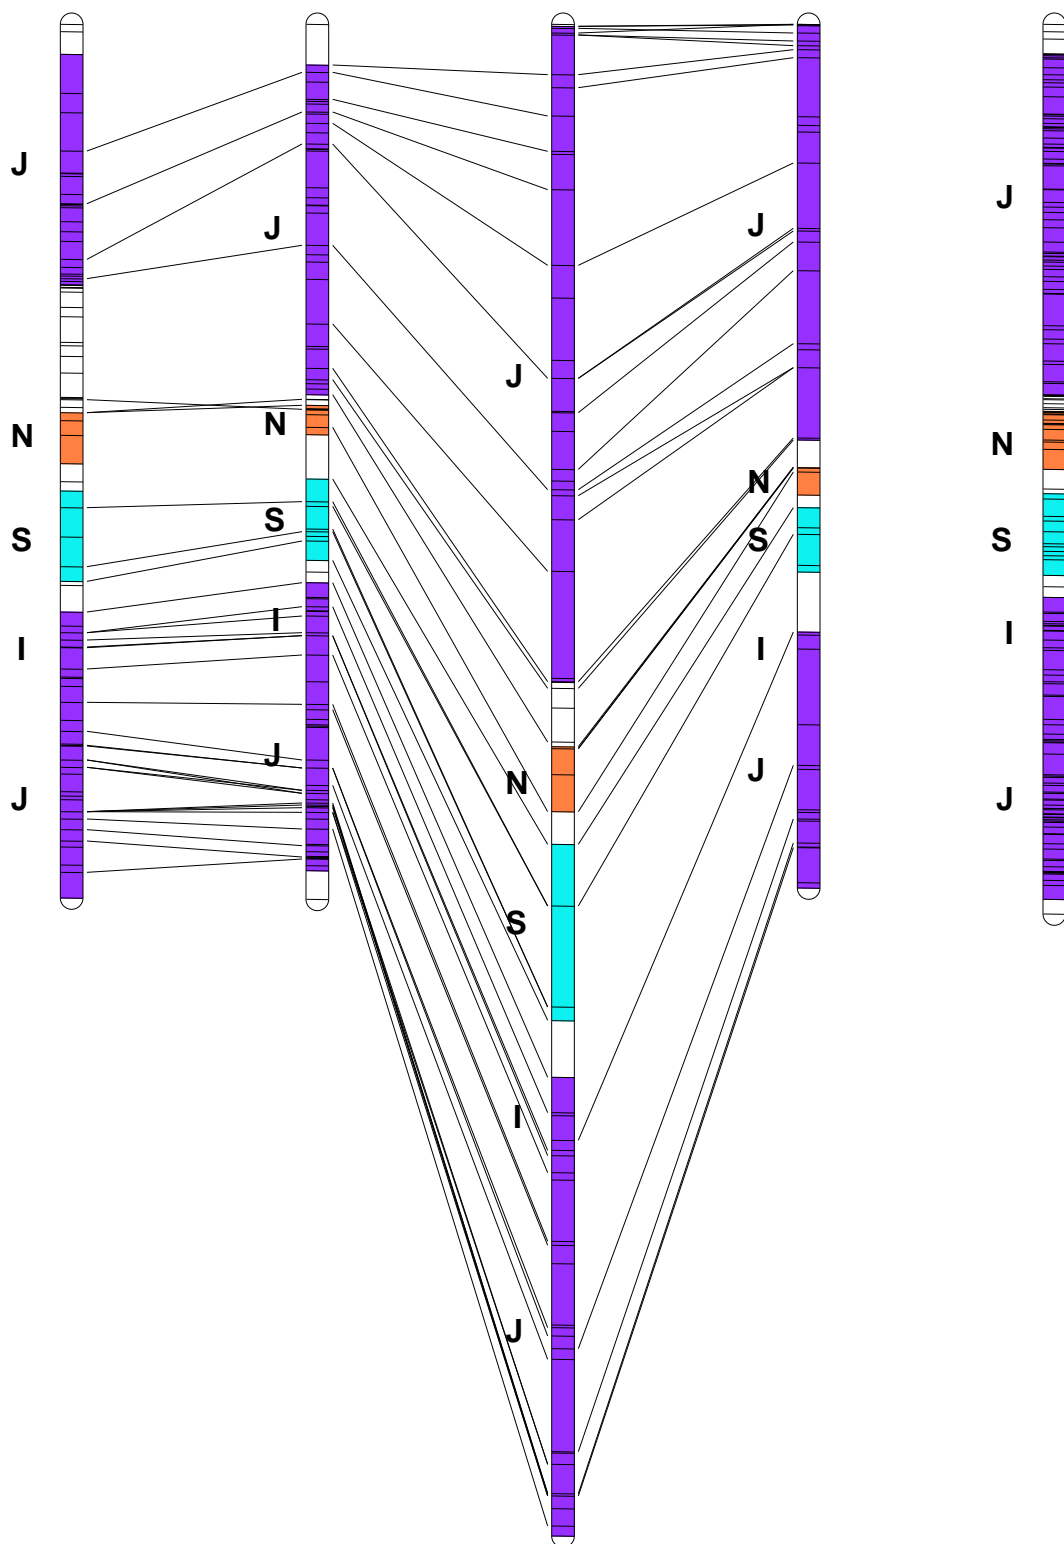

C5-TN

C5-DY

C5-AA

C5-AM

C5

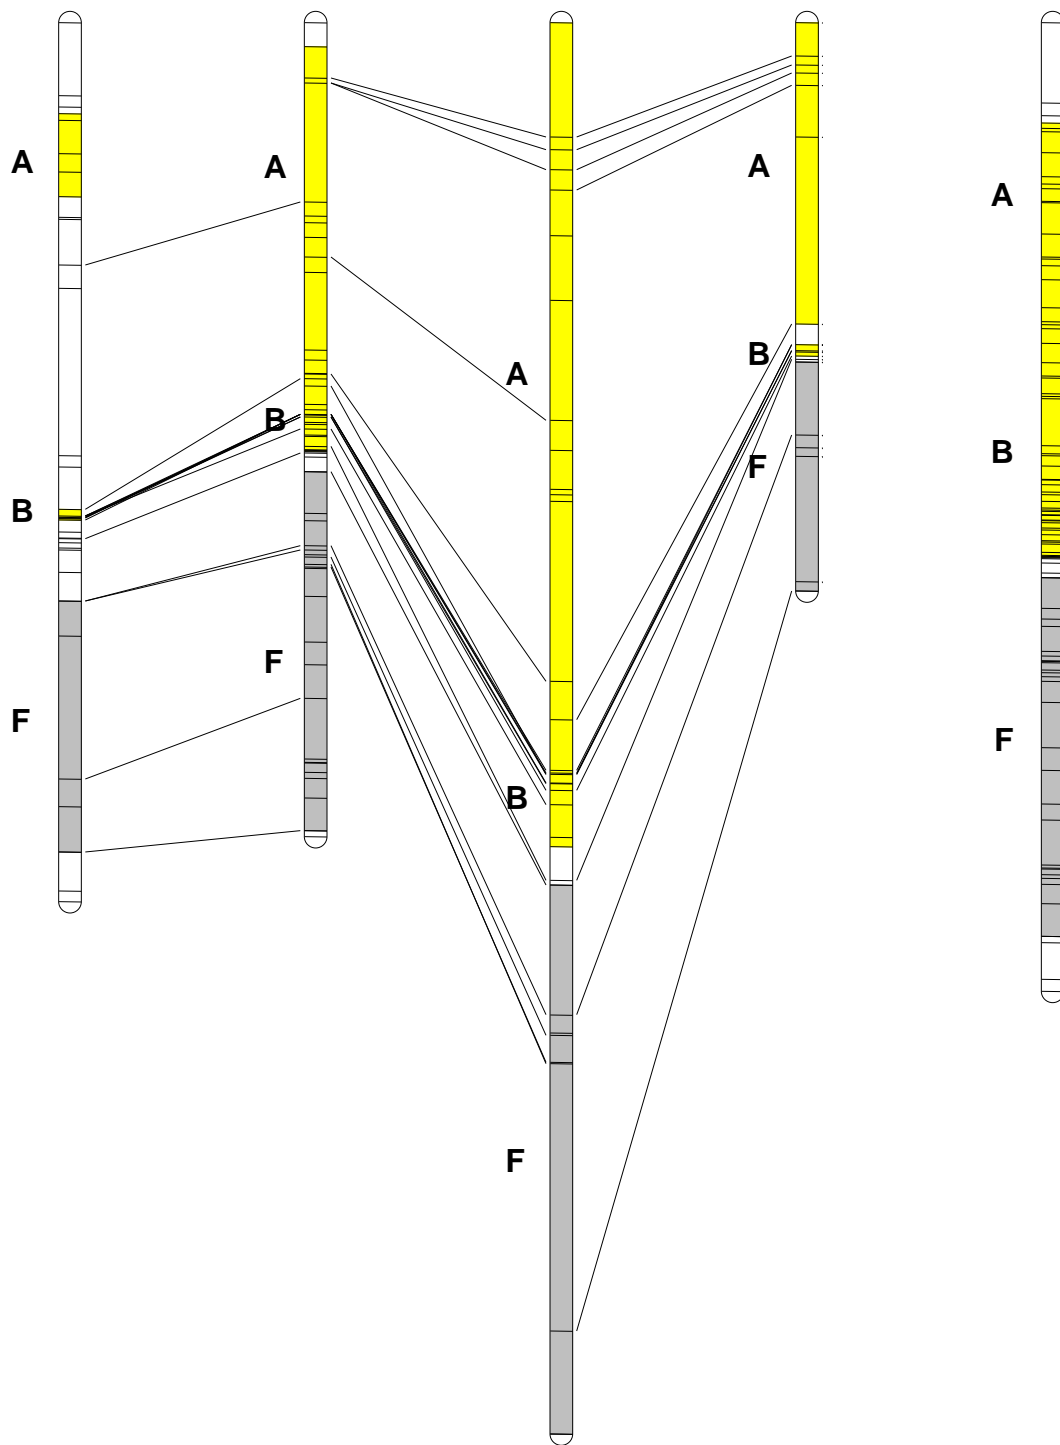

C6-TN

C6-DY

C6-AA

C6-AM

C6

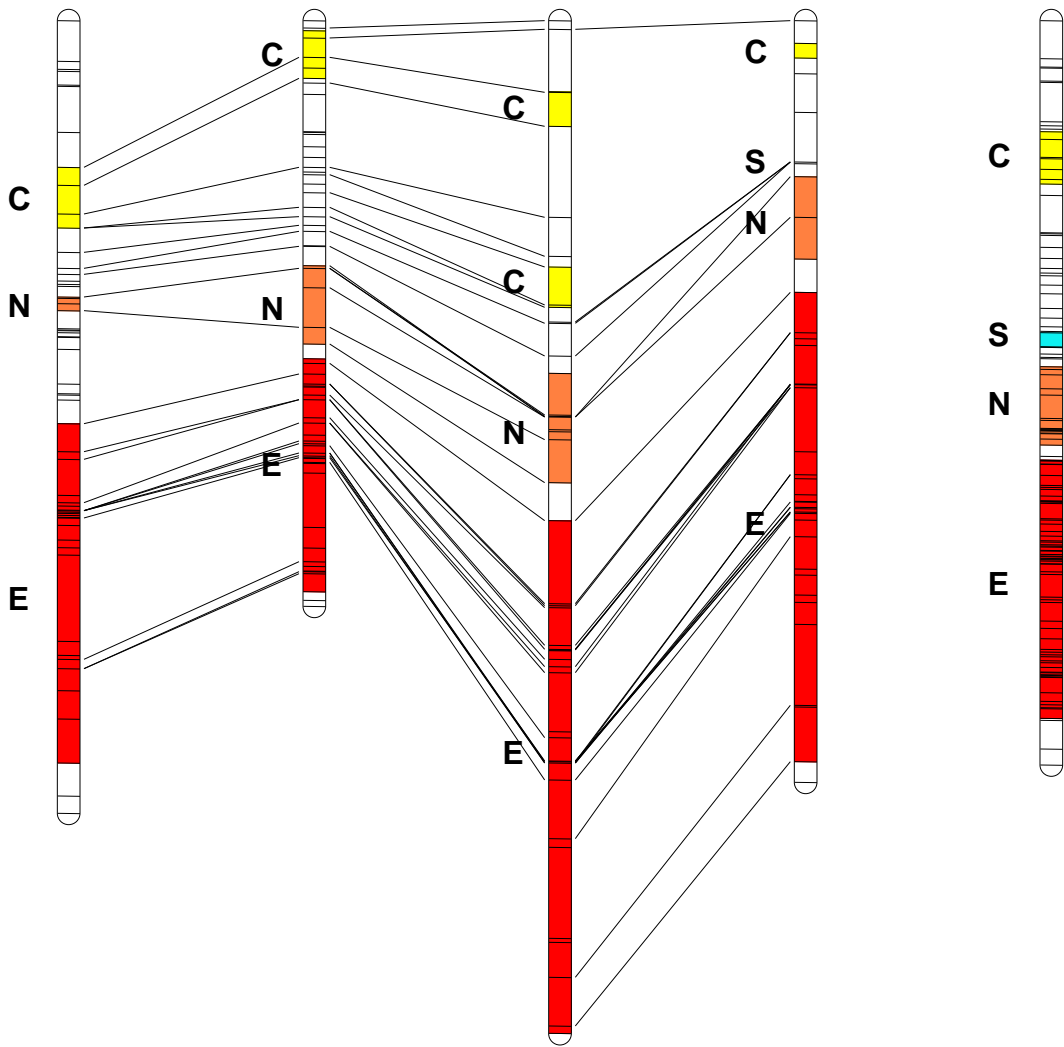



C7-TN

C7-DY

C7-AA

C7-AM

C7

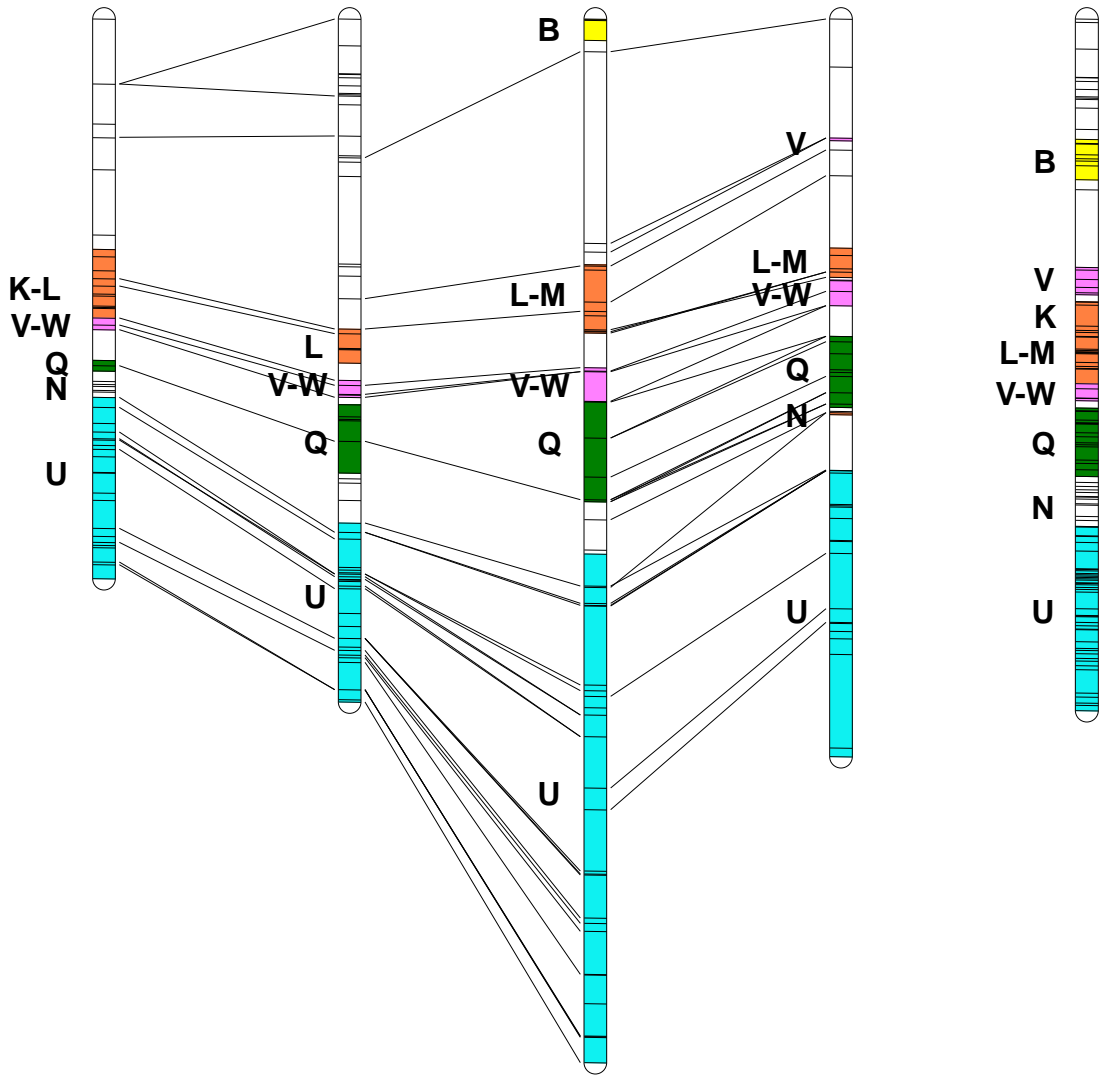

C8-TN

C8-DY

C8-AA

C8-AM

C8

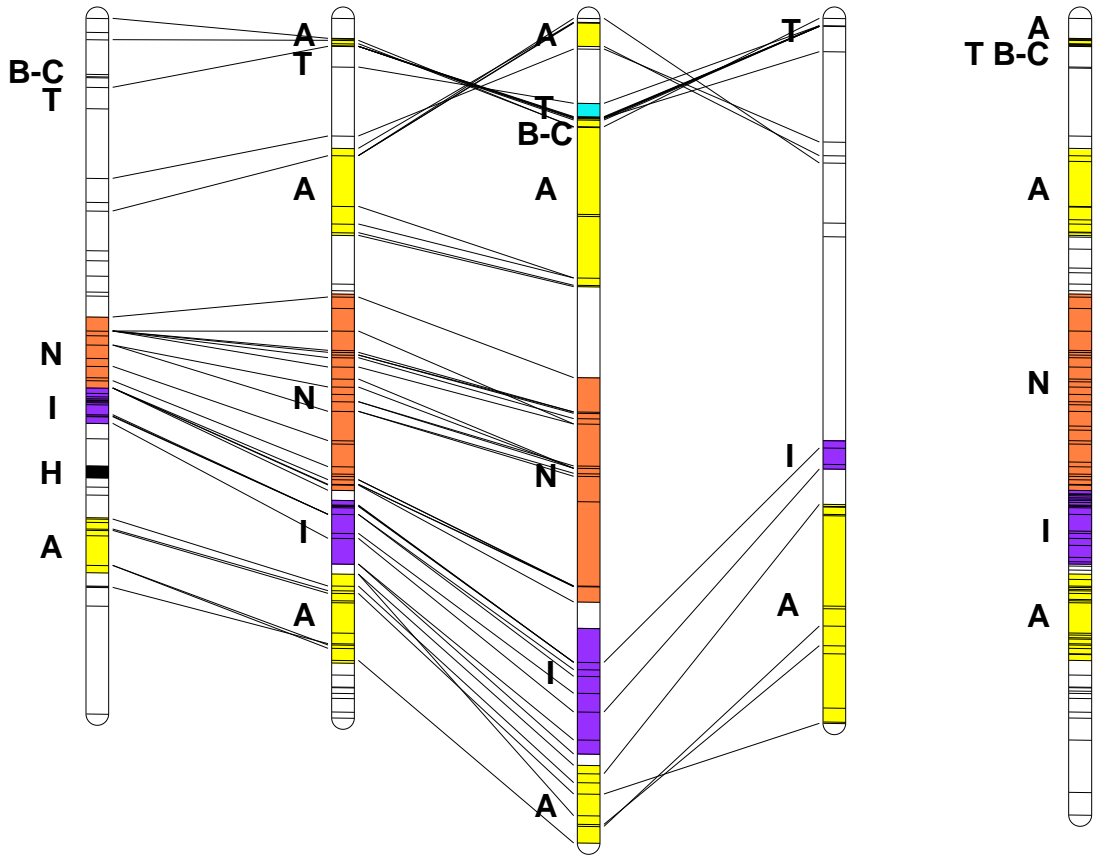

C9-TN

C9-DY

C9-AA

C9-AM

C9

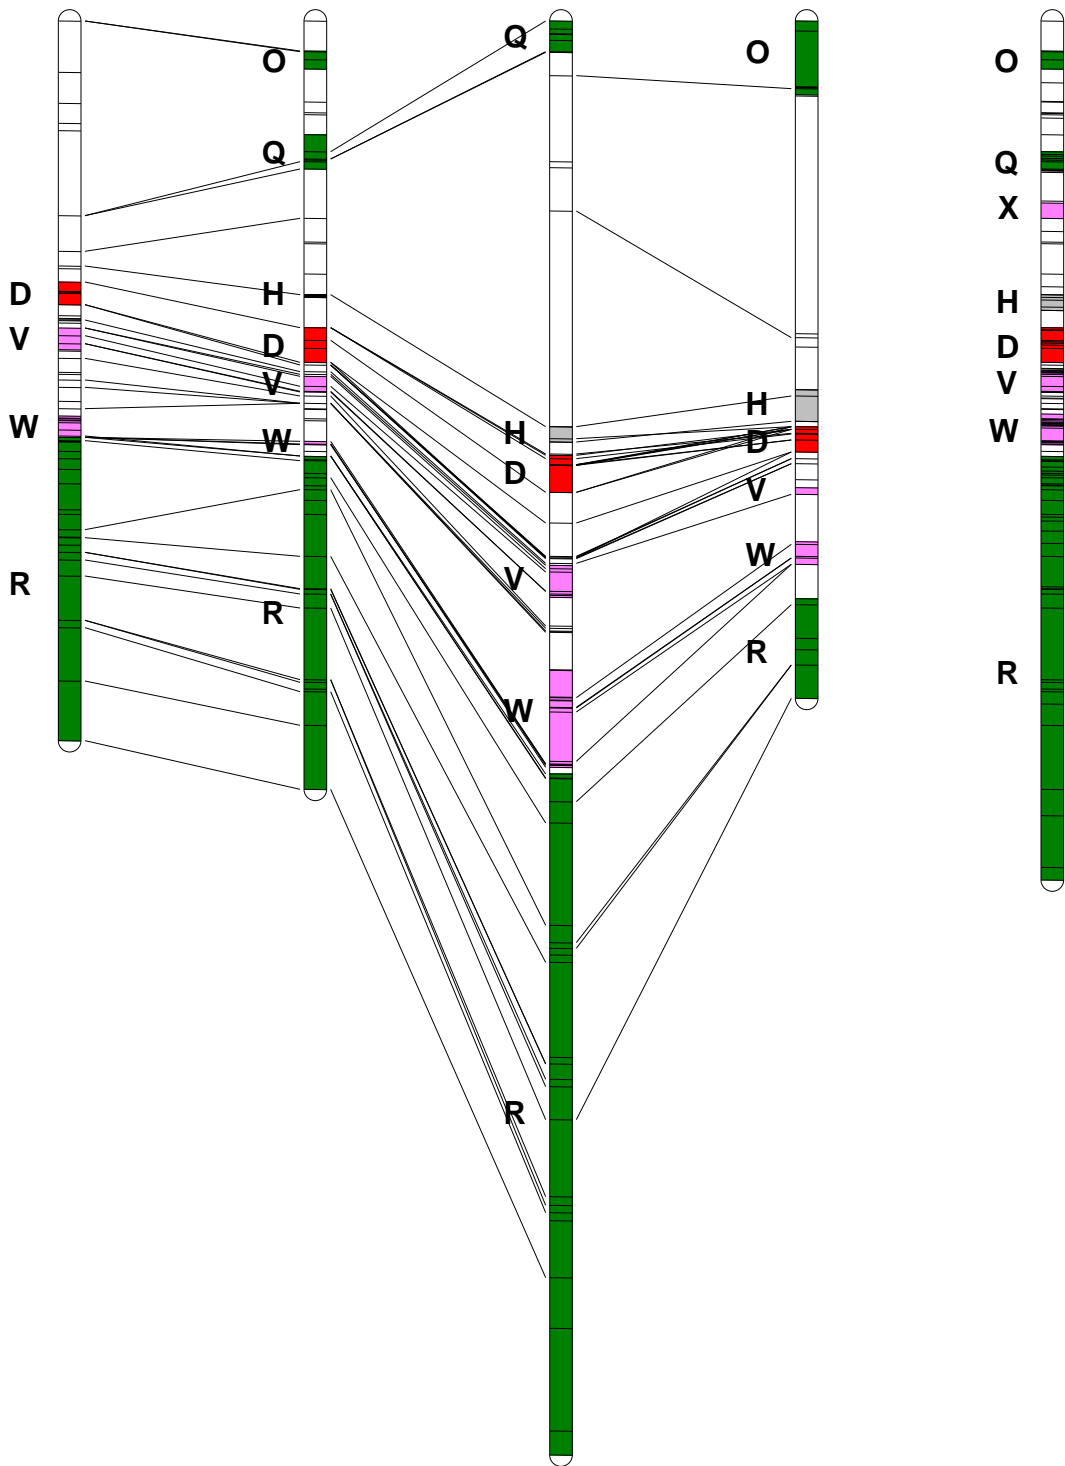

Supplement: 1471-2164-14-120-S3.pdf [file 1471-2164-14-120-S3.pdf]
