# Supplementary material for: High-density SNP-based genetic map development and linkage disequilibrium assessment in Brassica napus L
Source: PubMed Central journal article supplement (PMC3600037; doi:10.1186/1471-2164-14-120), 2013-02-22

**Supplementary figure 2:** Dot-plots obtained for each linkage group between the integrated map and all four individual TNDH, DYDH, AADH and AMDH maps. The marker order on the vertical axis is from the four individual maps and the marker order on the horizontal axis is from the integrated map. Cumulative genetic distance in cM is indicated on each axis.

A1

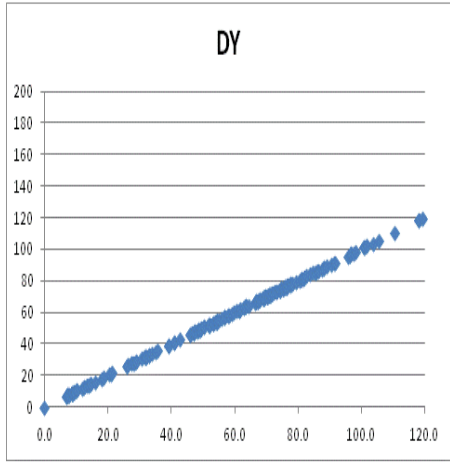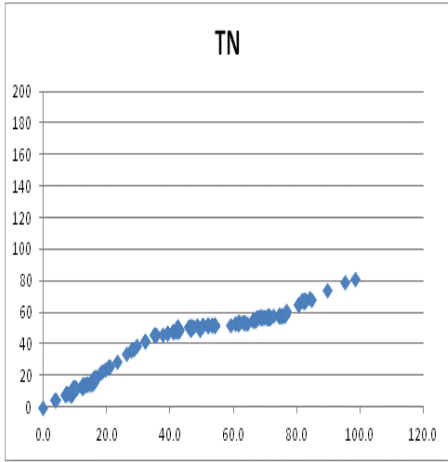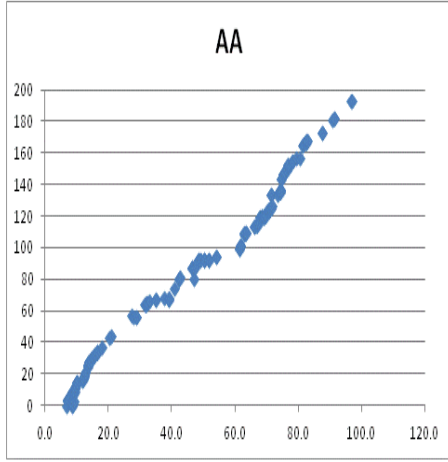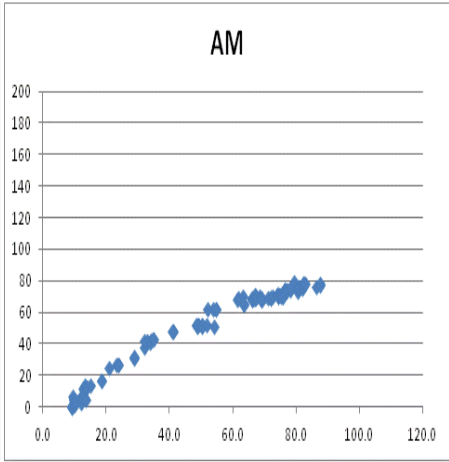

A2

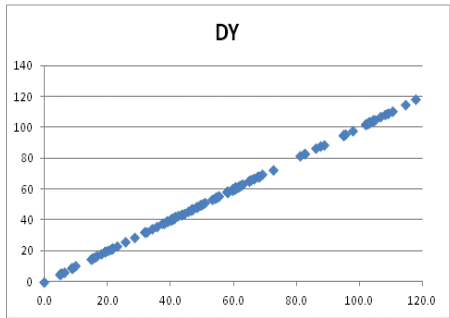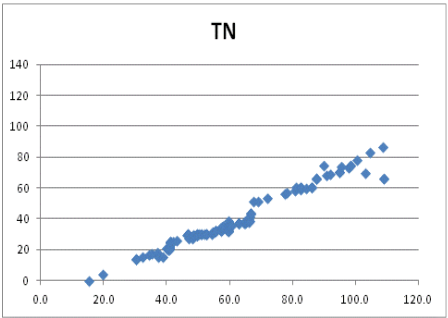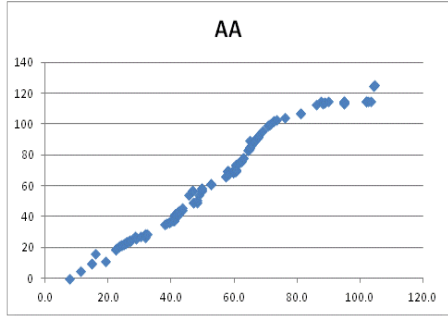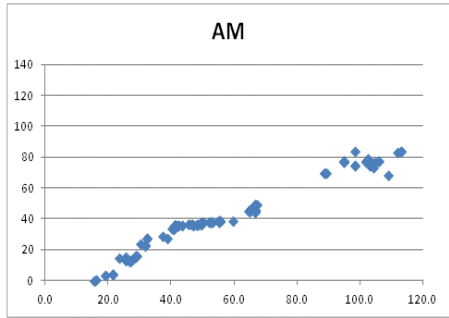

A3

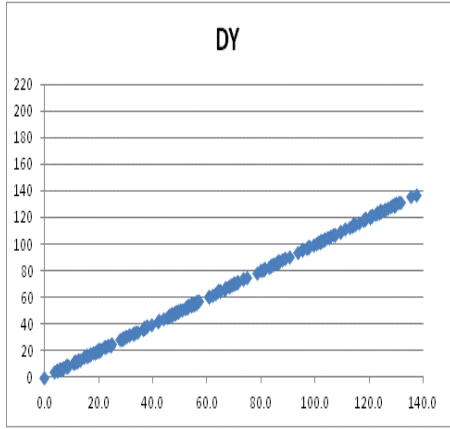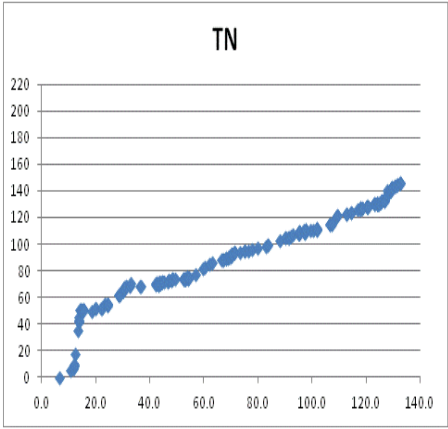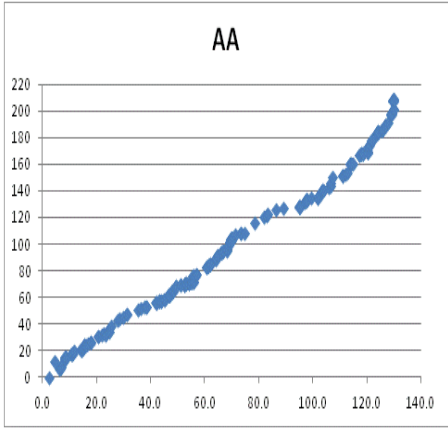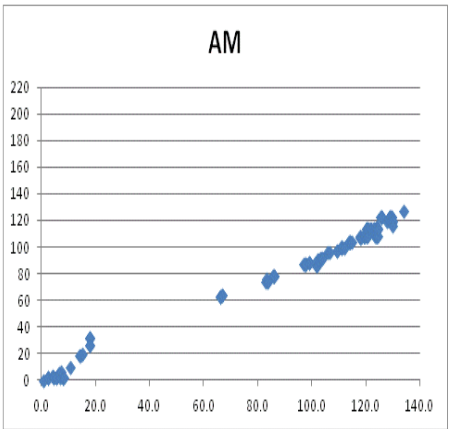

A4

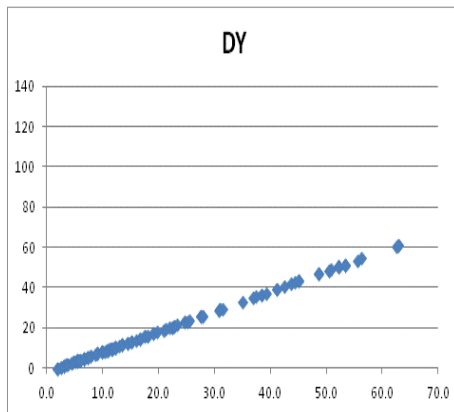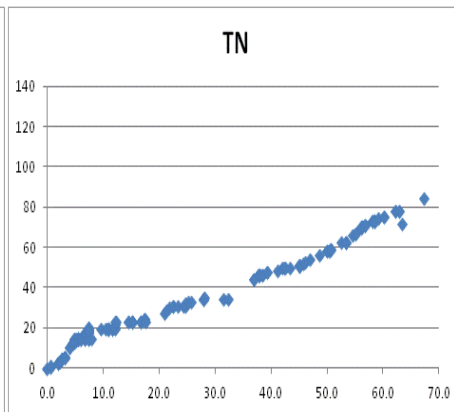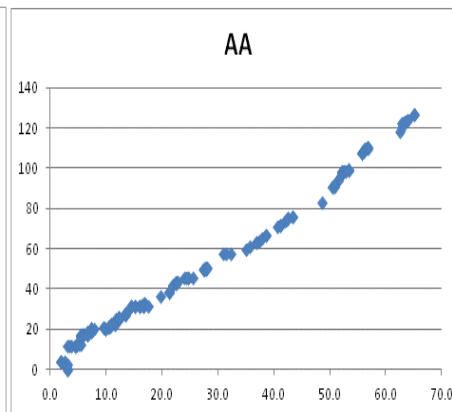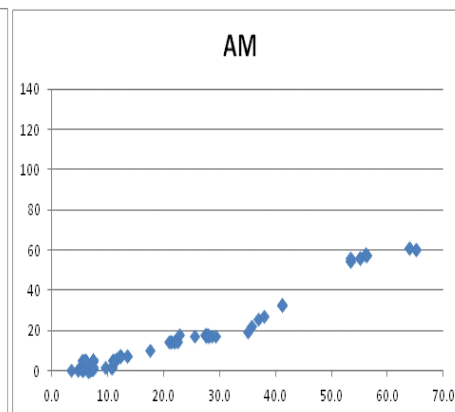

A5

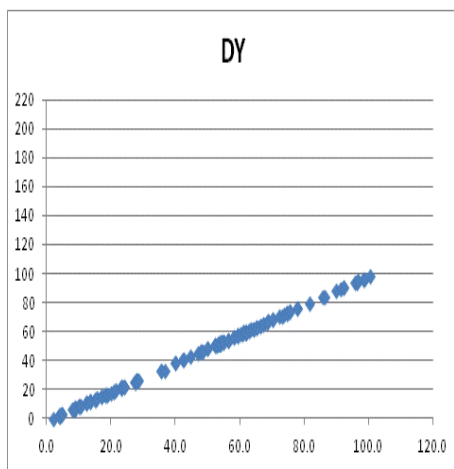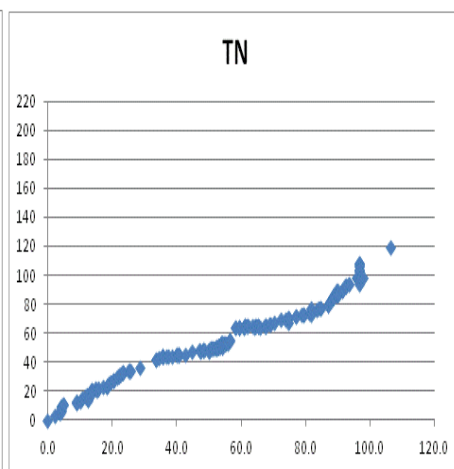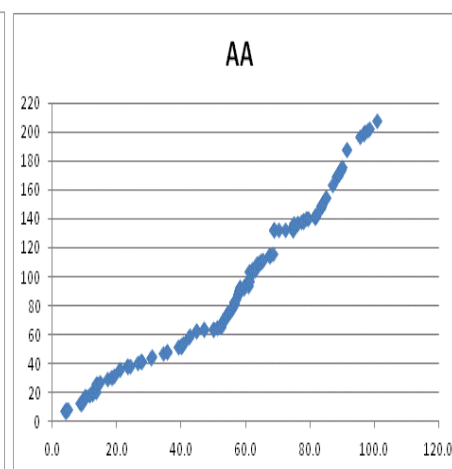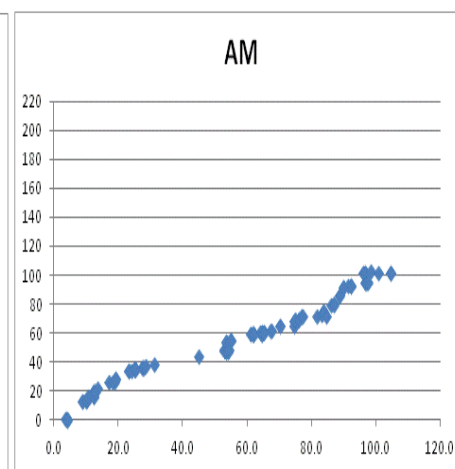

A6

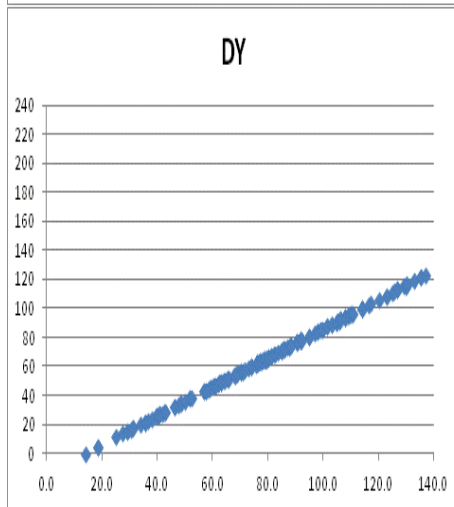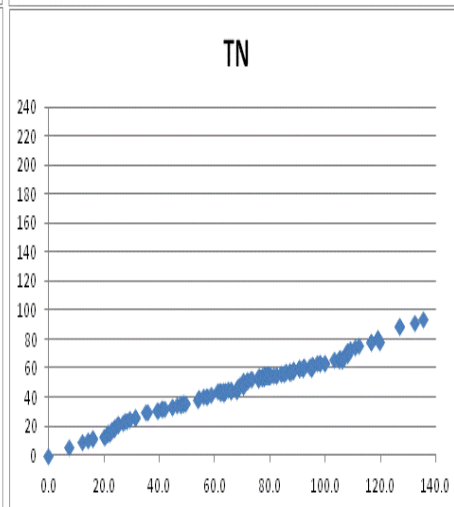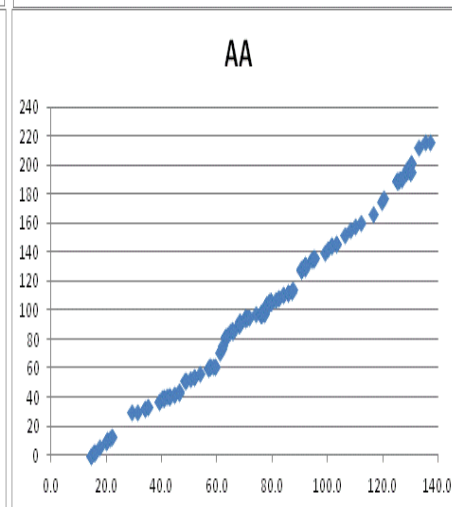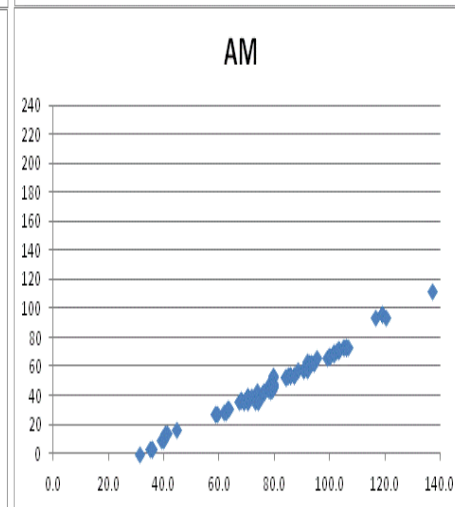

A7

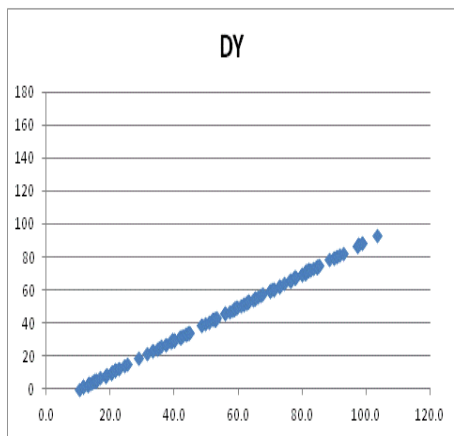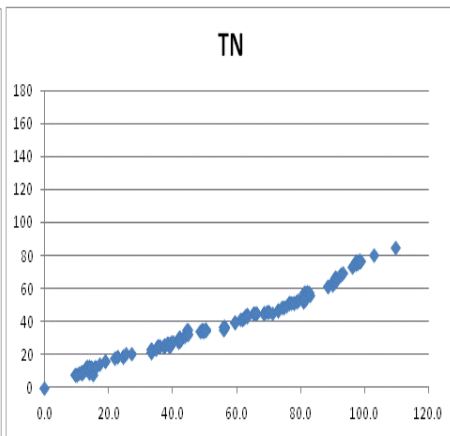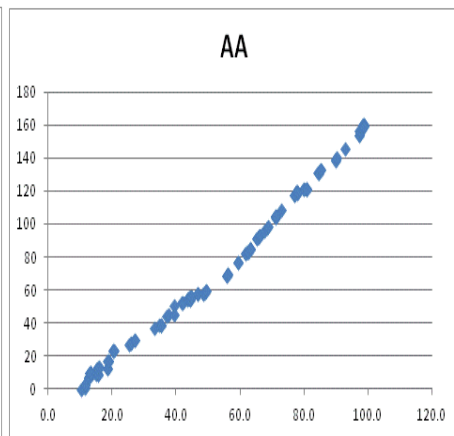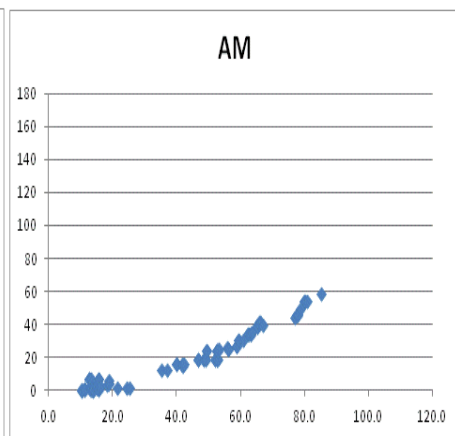

A8

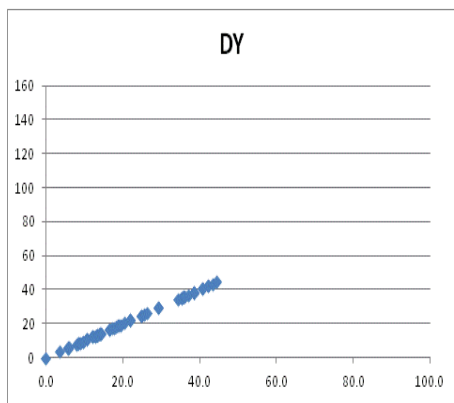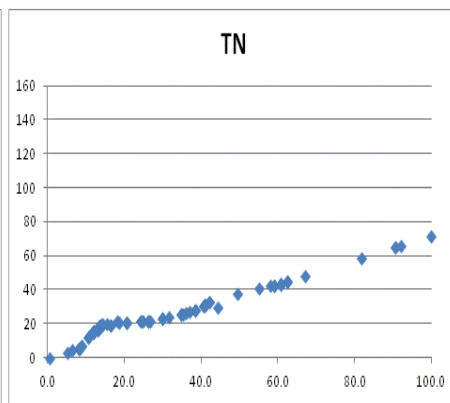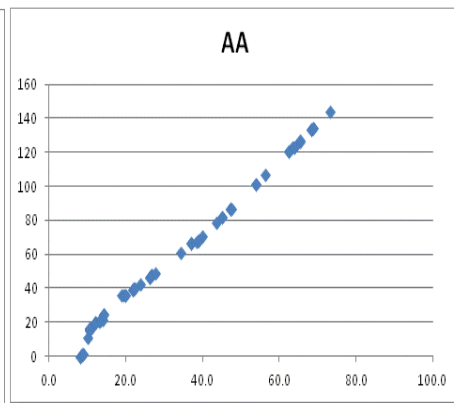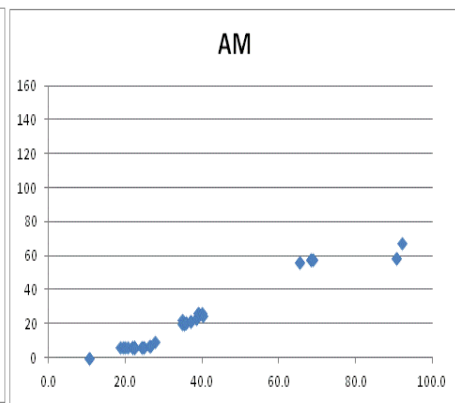

A9

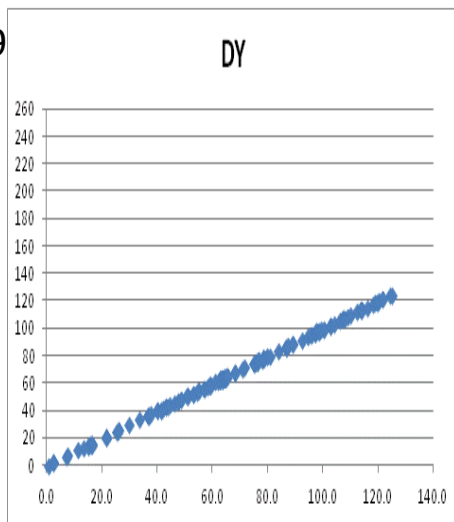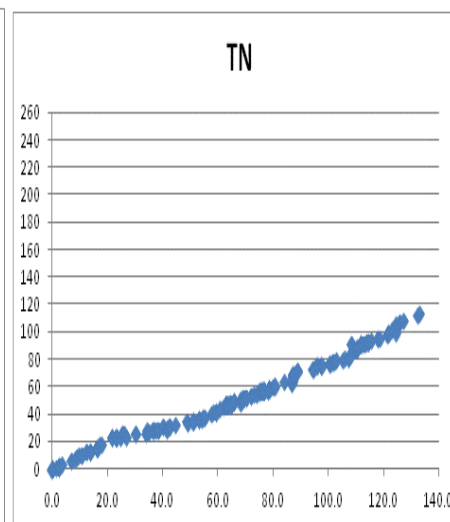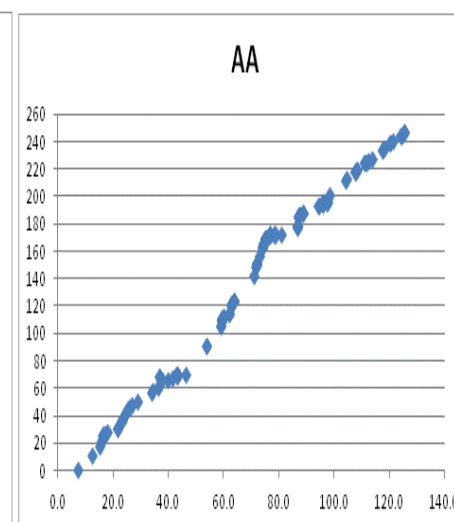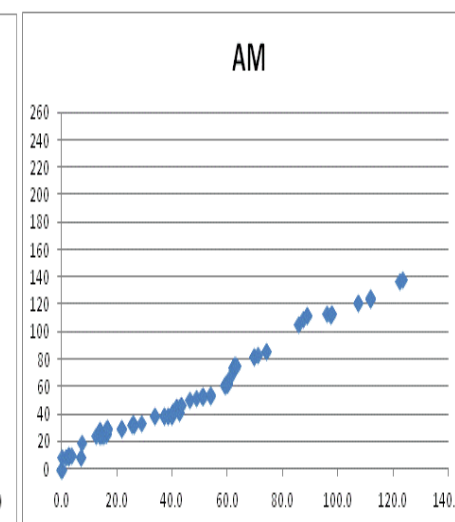

A10

DY

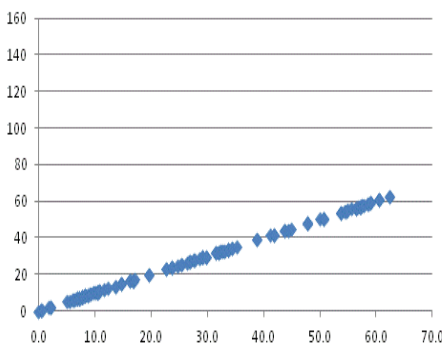

TN

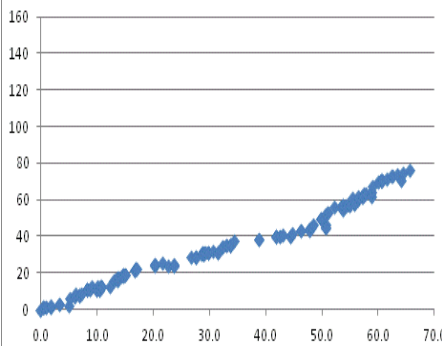

AA

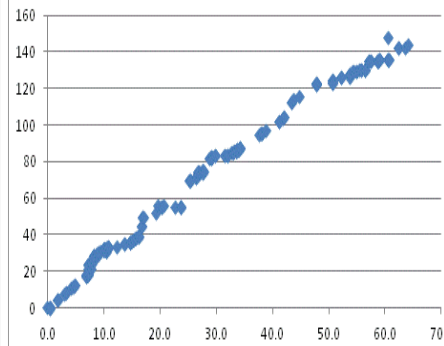

AM

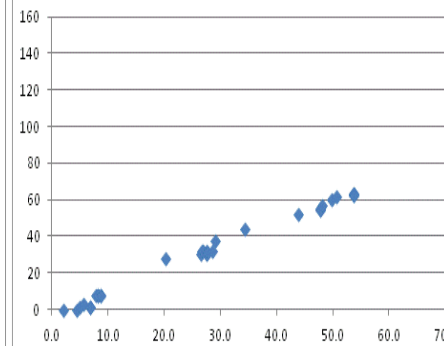

C1

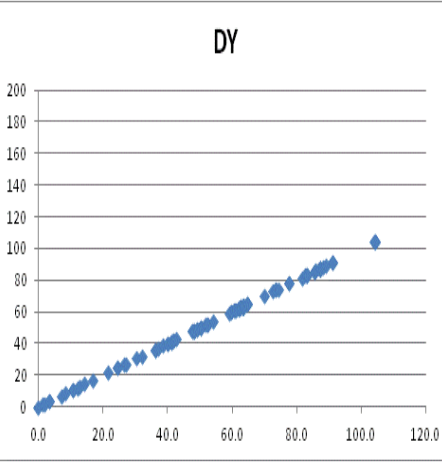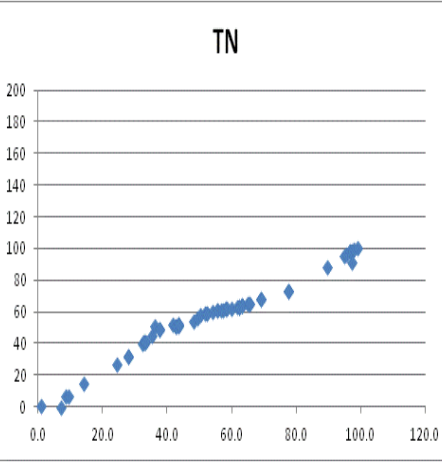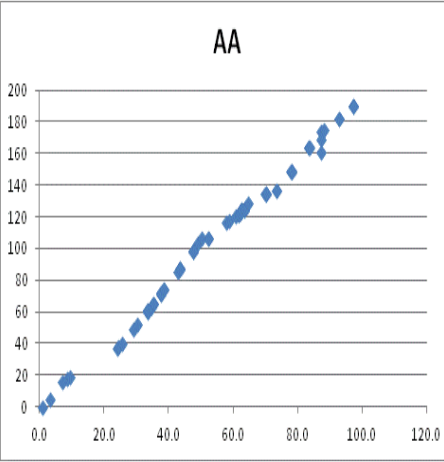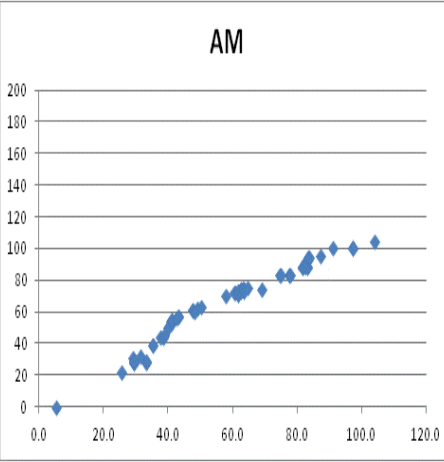

C2

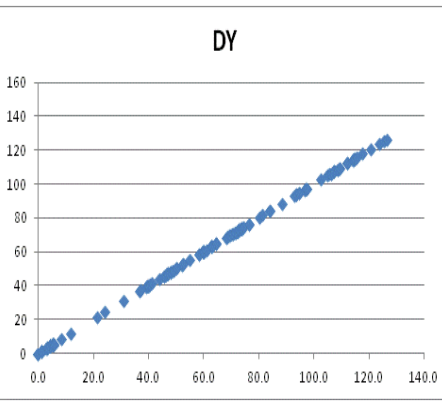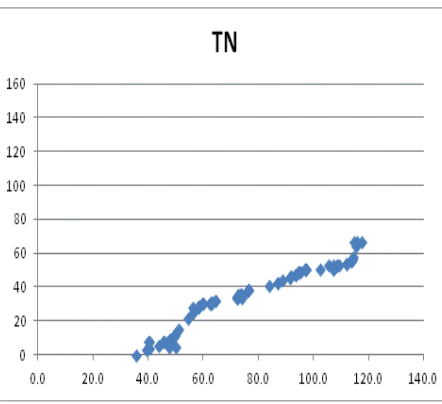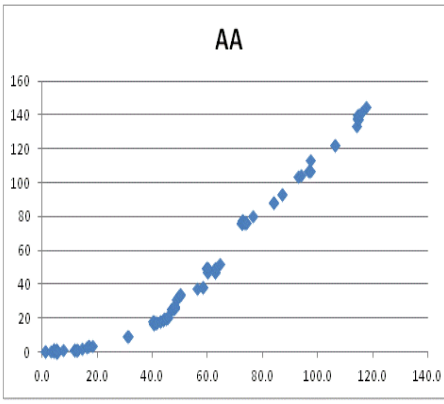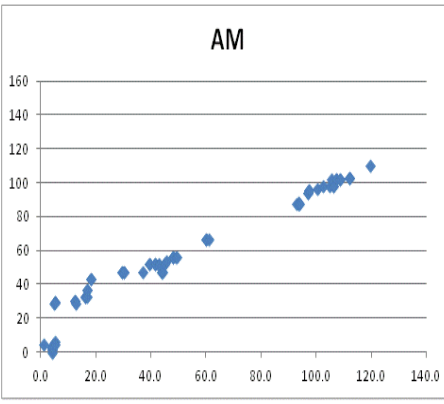

C3

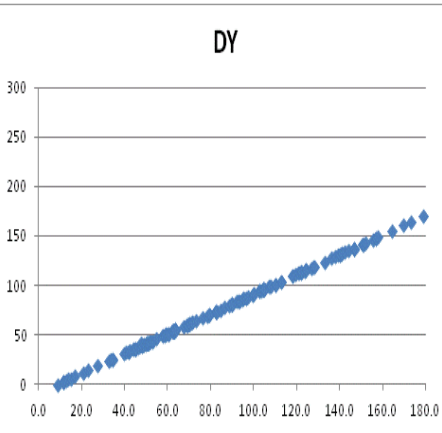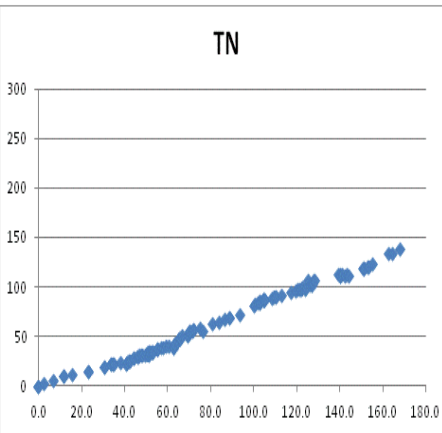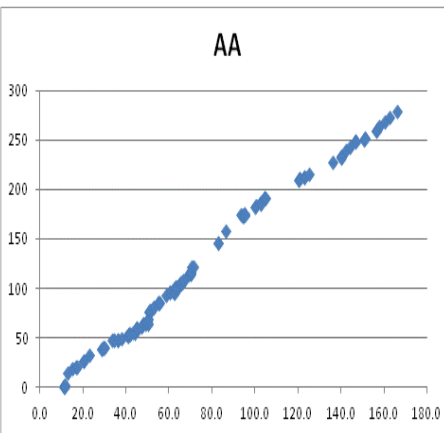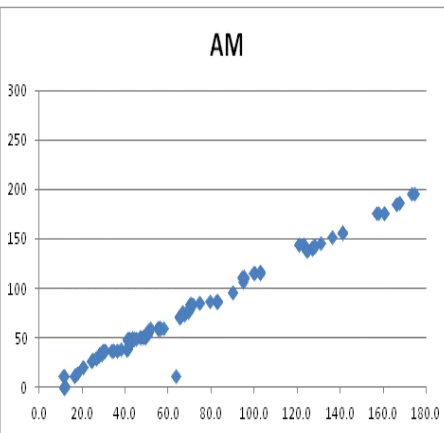

C4

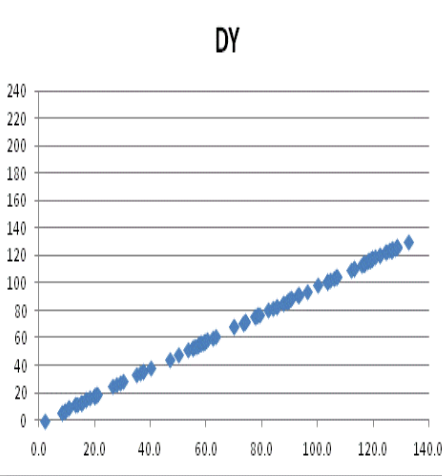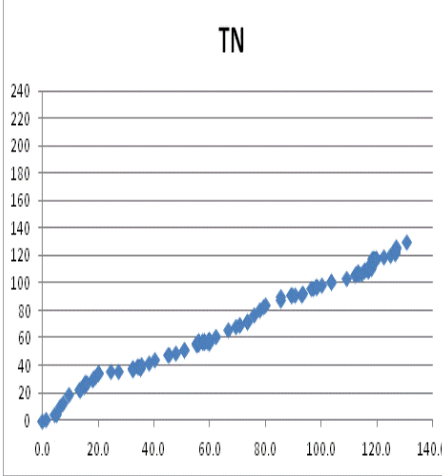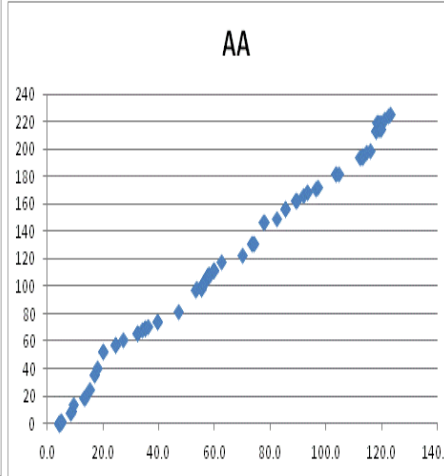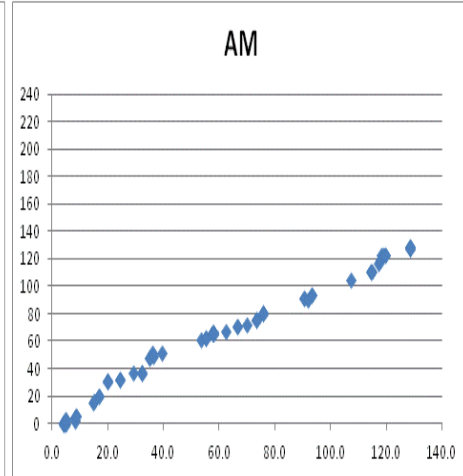

C5

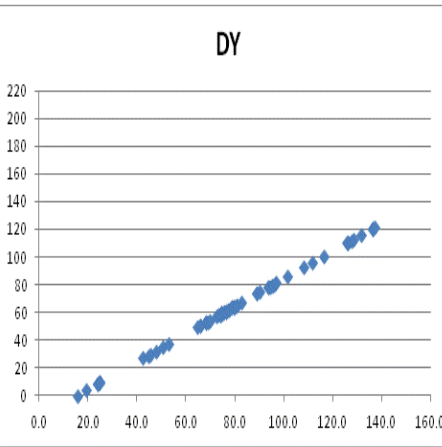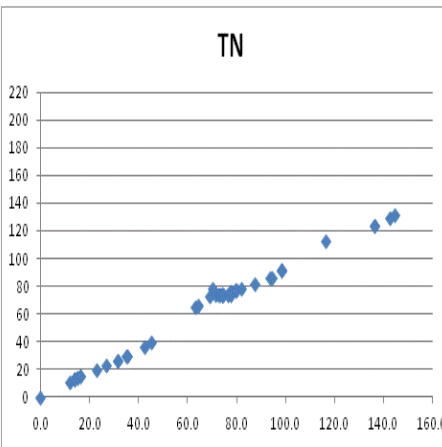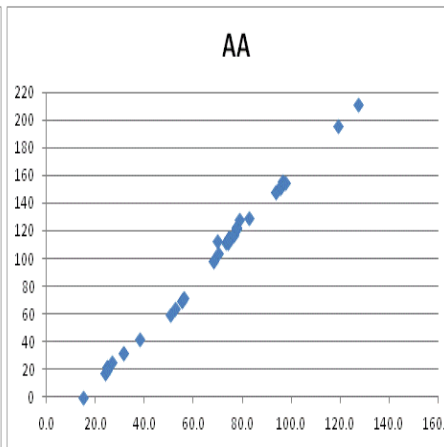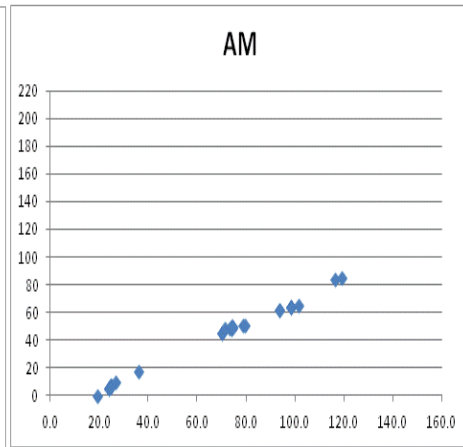

C6

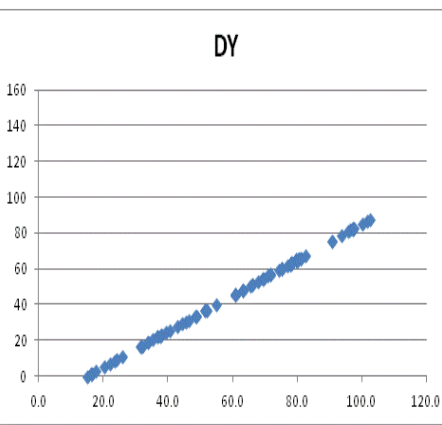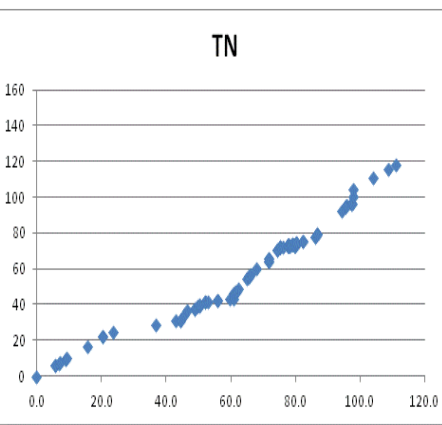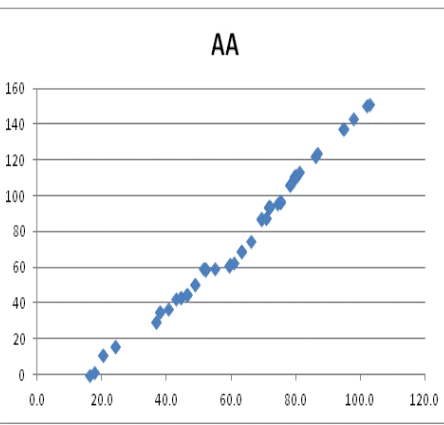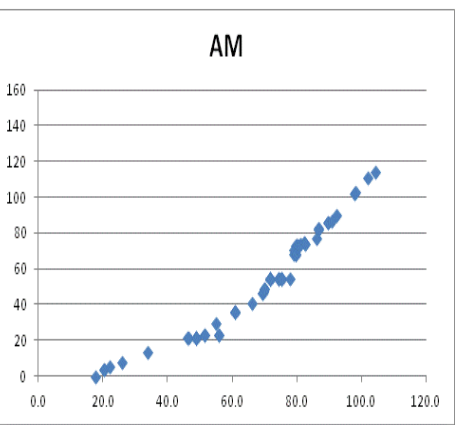

C7

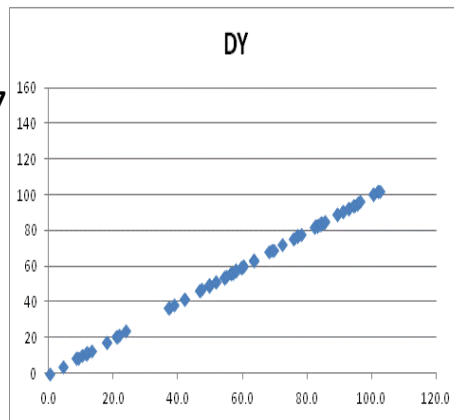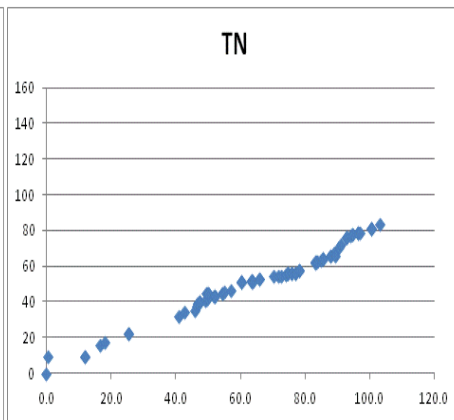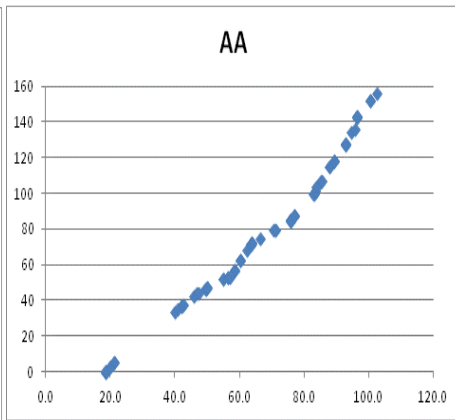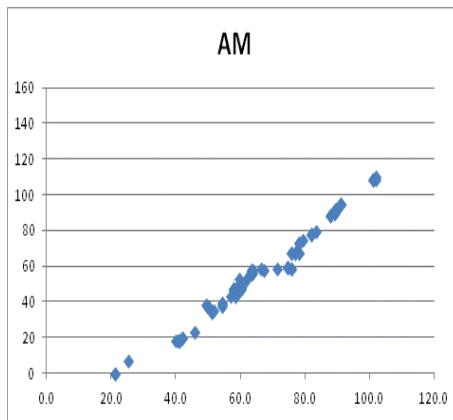

C8

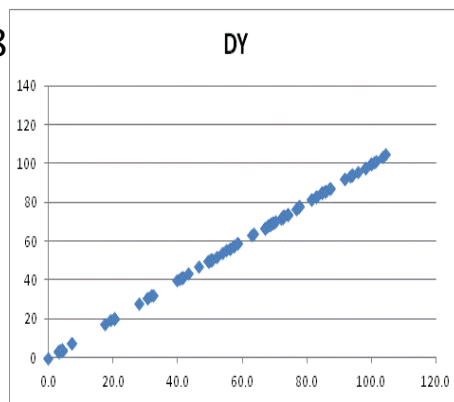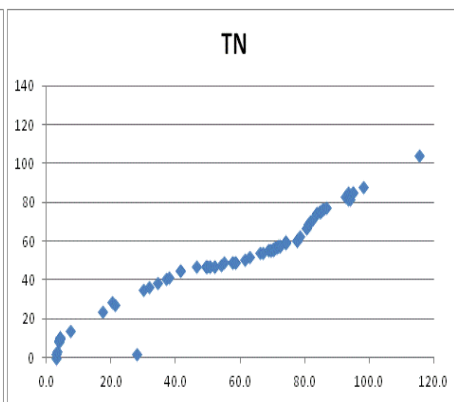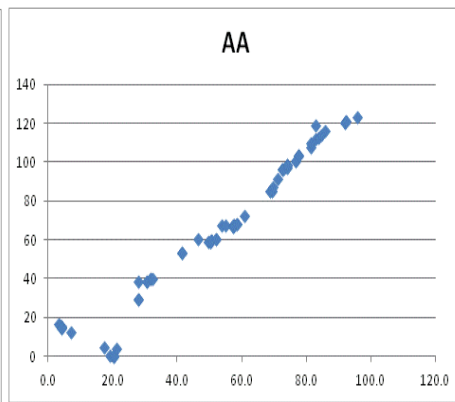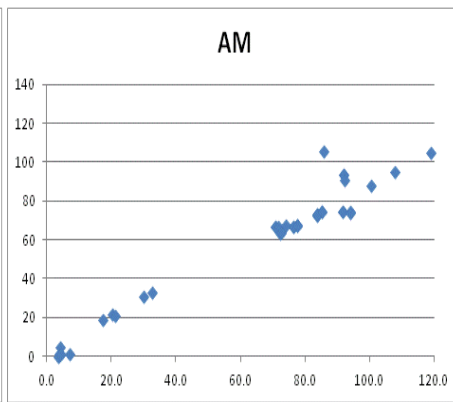

C9

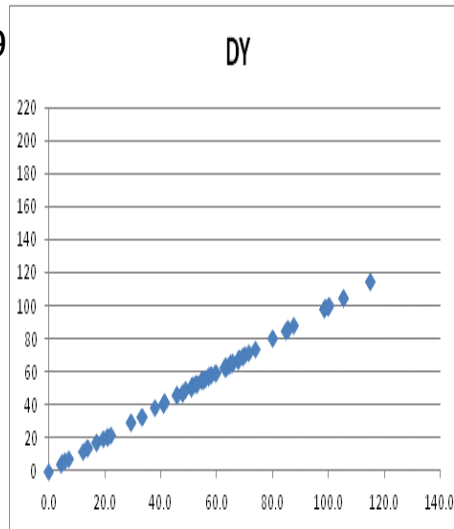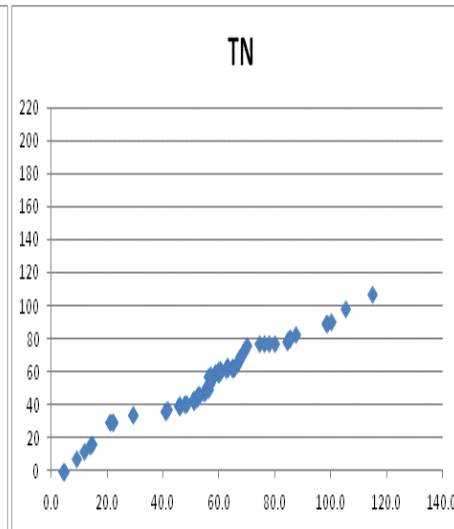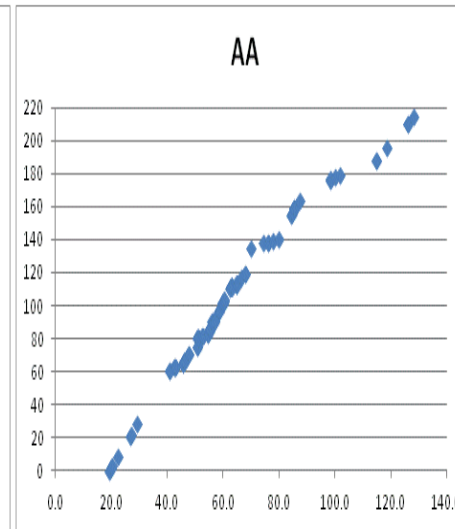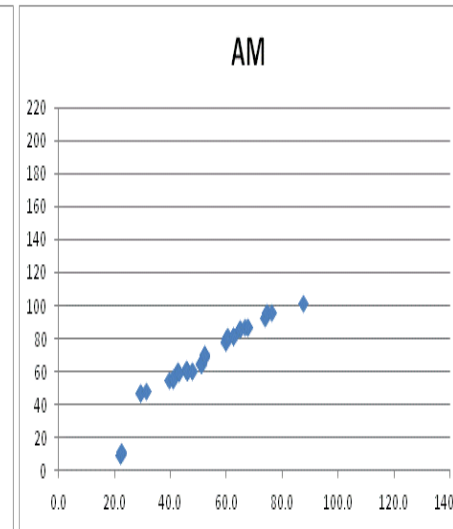

Supplement: 1471-2164-14-120-S4.pdf [file 1471-2164-14-120-S4.pdf]
