# Supplementary material for: High-density SNP-based genetic map development and linkage disequilibrium assessment in Brassica napus L
Source: PubMed Central journal article supplement (PMC3600037; doi:10.1186/1471-2164-14-120), 2013-02-22

**Supplementary figure 3:** Distribution of PIC values along the linkage groups in the fodder rape (FO), spring (SOSR) and winter (WOSR) oilseed rape and the different seed quality subgroups (++, 0+, 00) within WOSR. PIC was averaged across a sliding window of 10 cM with a step of one cM.

A1

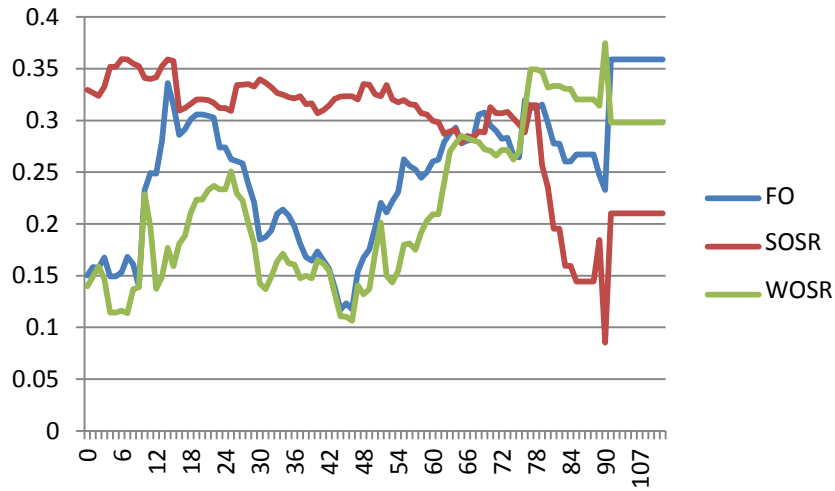

A2

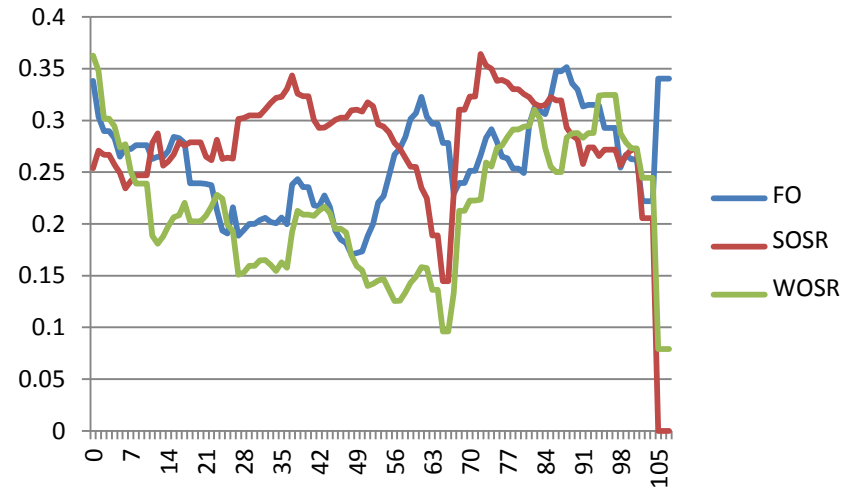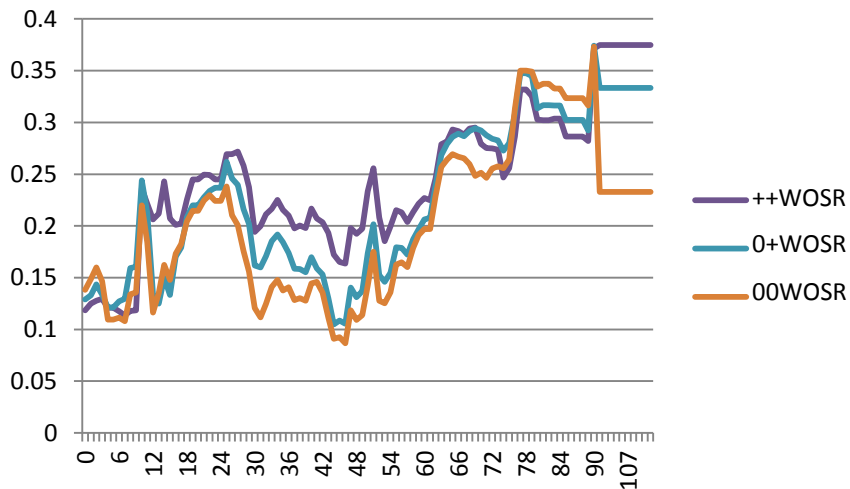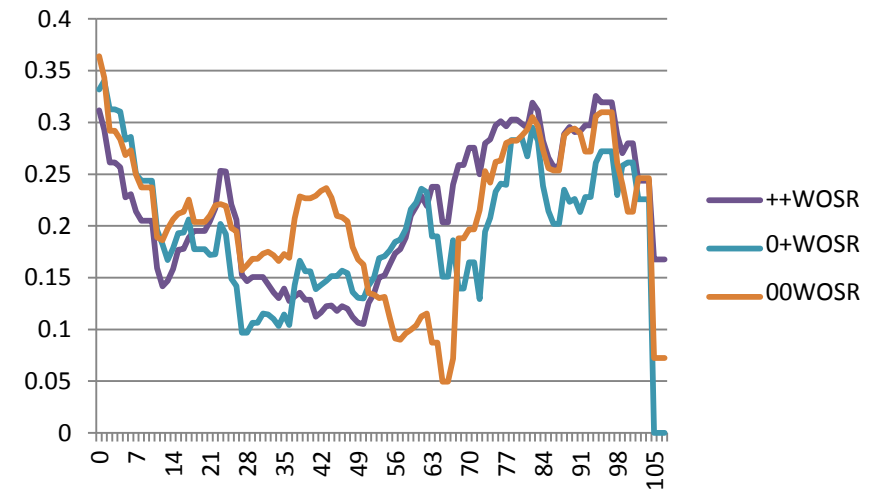

### A3

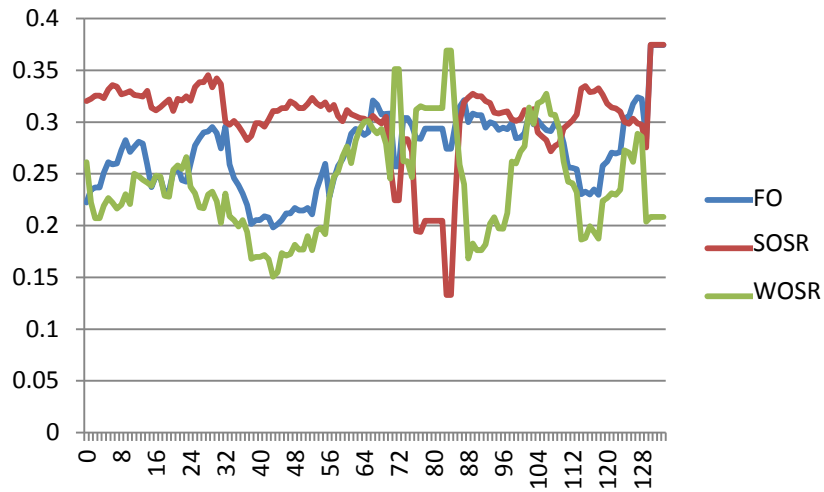

### A4

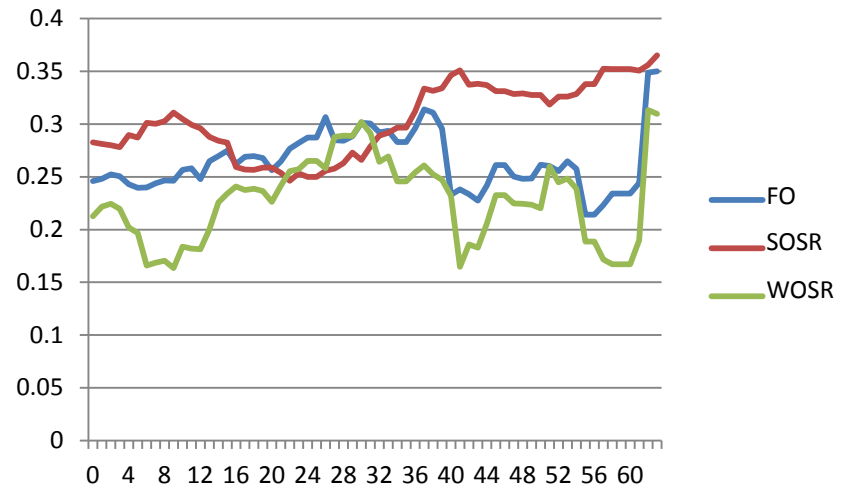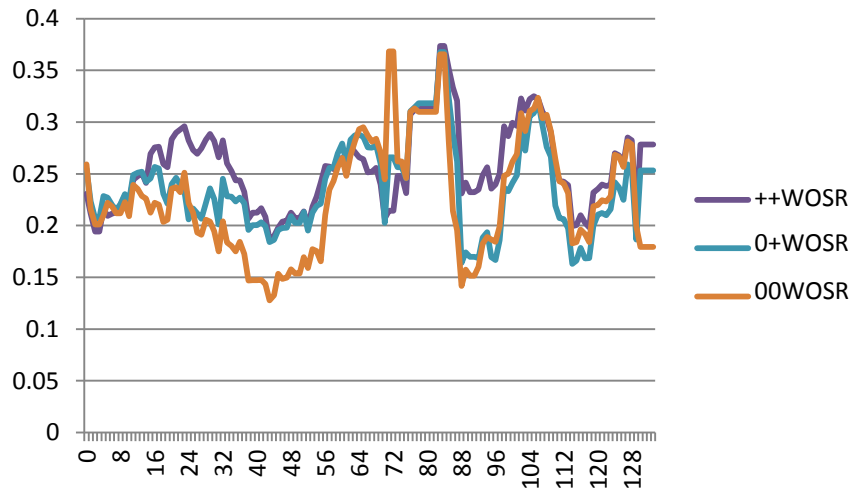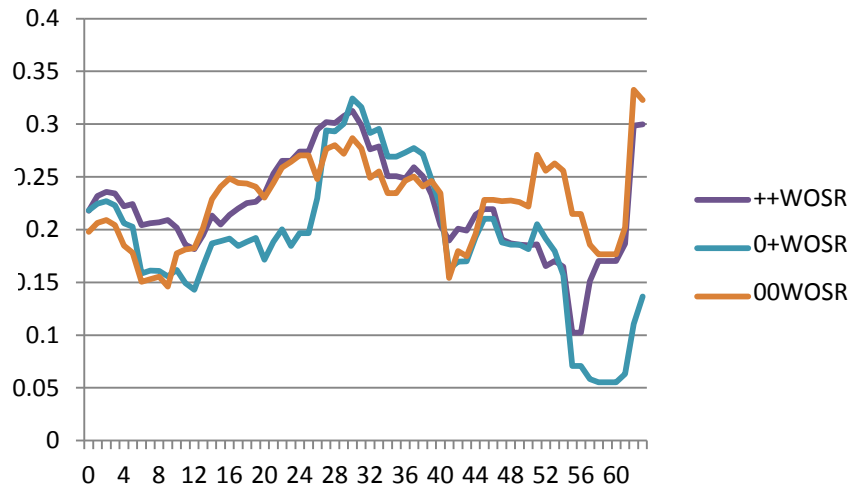

A5

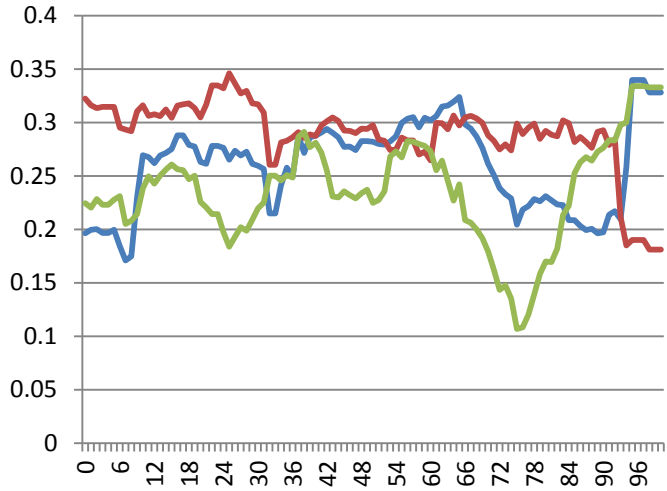

FO  
SOSR  
WOSR

A6

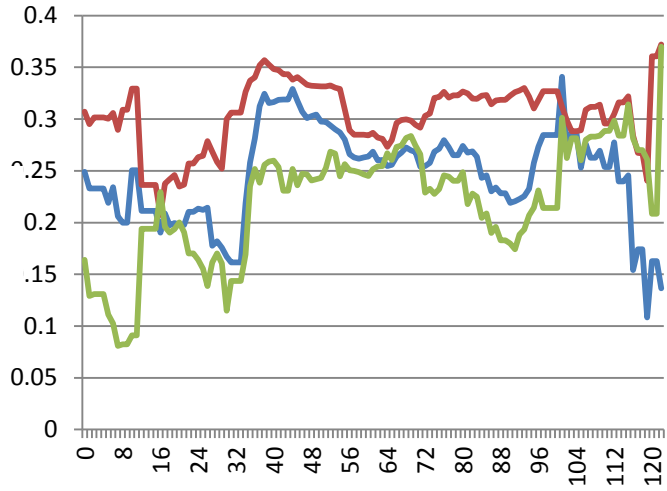

FO  
SOSR  
WOSR

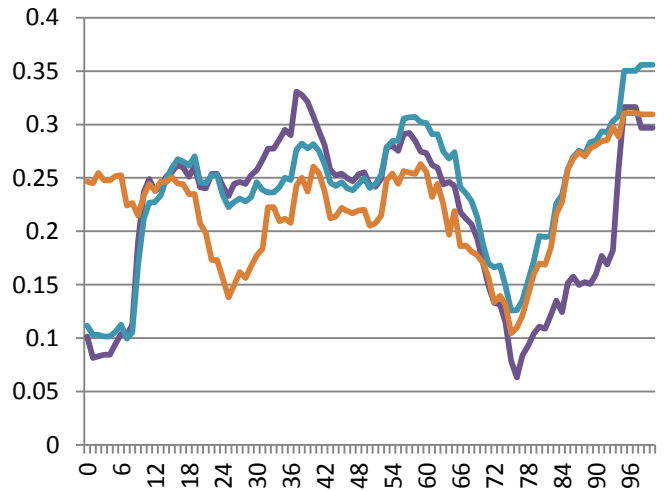

++WOSR  
0+WOSR  
00WOSR

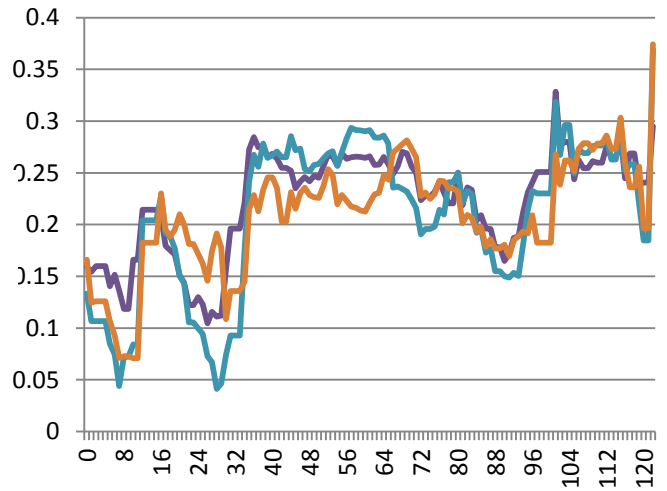

++WOSR  
0+WOSR  
00WOSR

A7

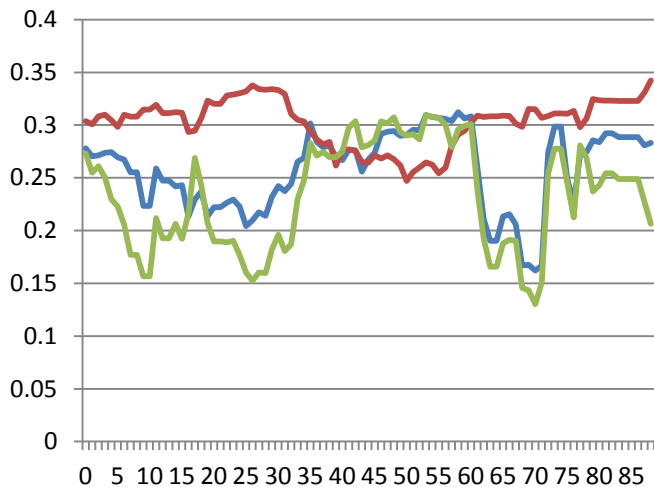

A8

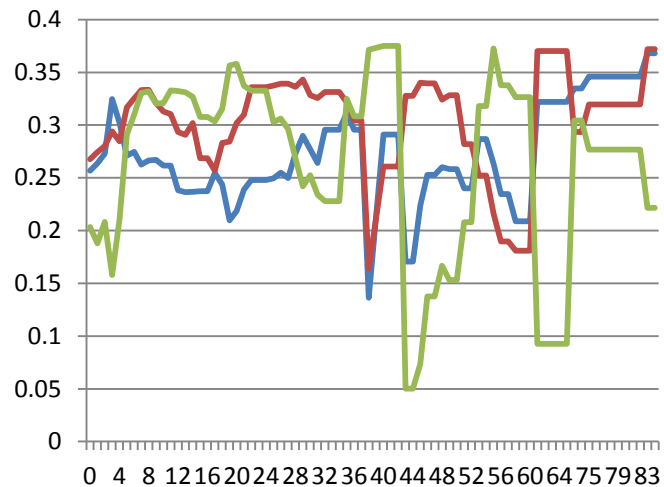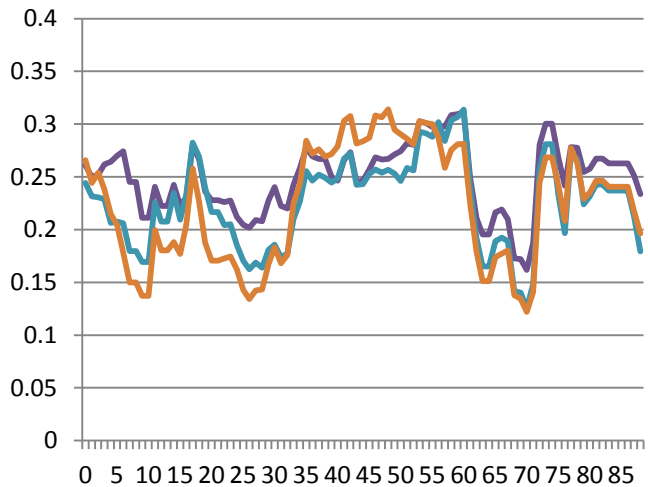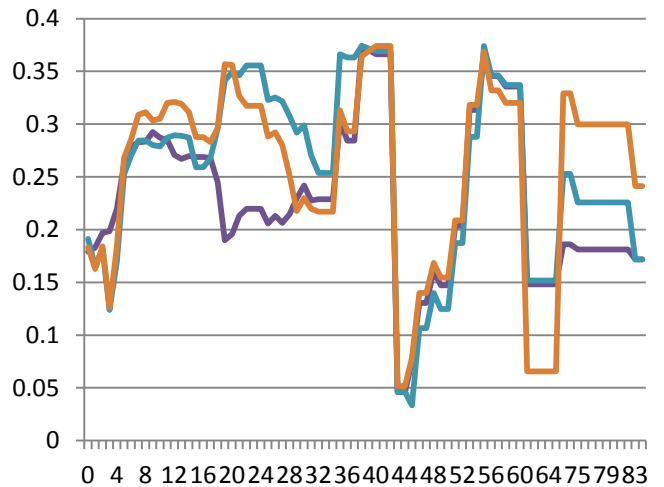

A9

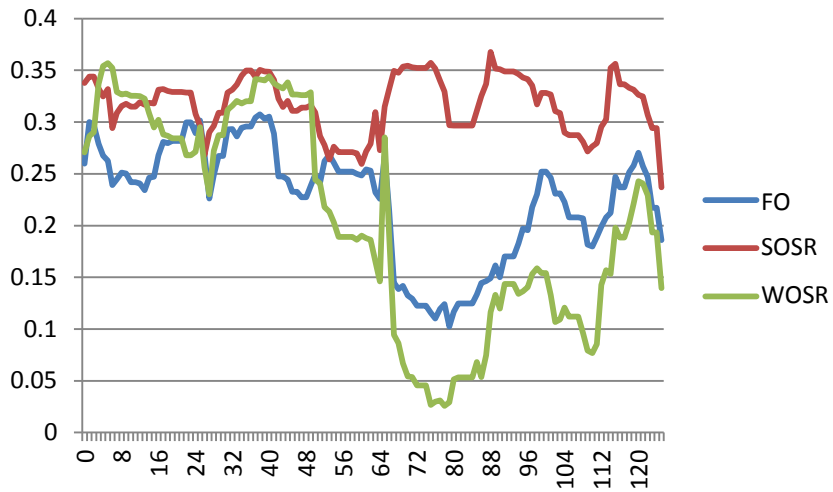

A10

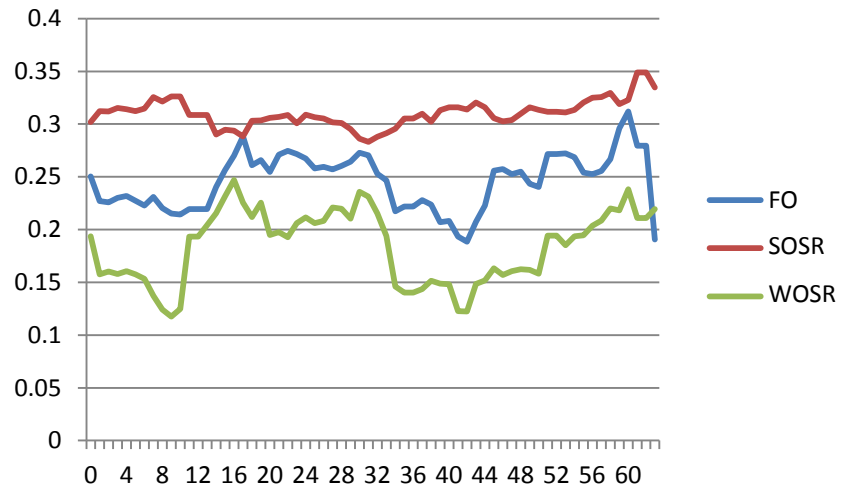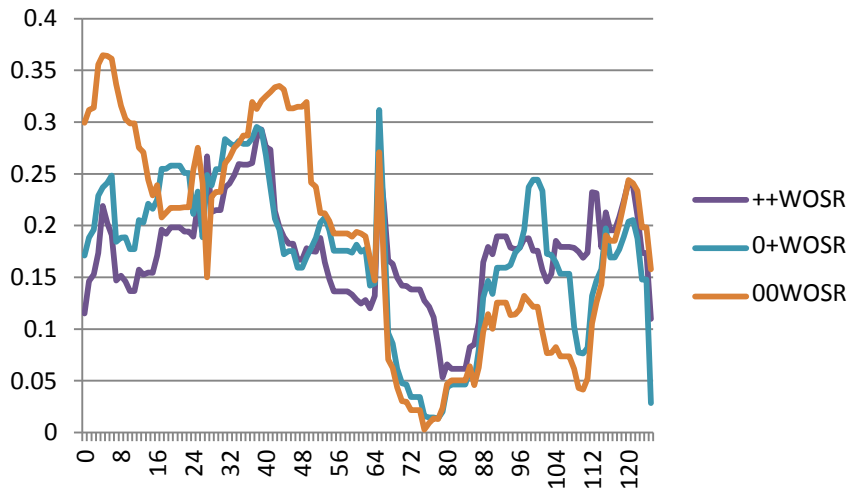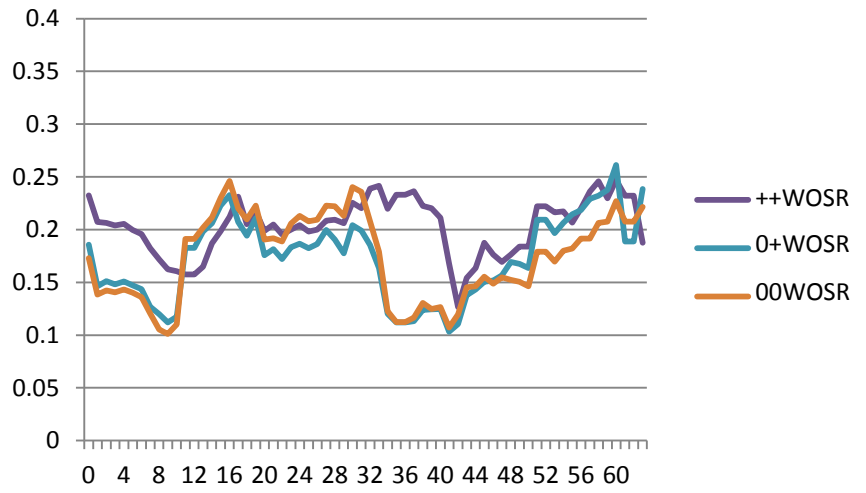

C1

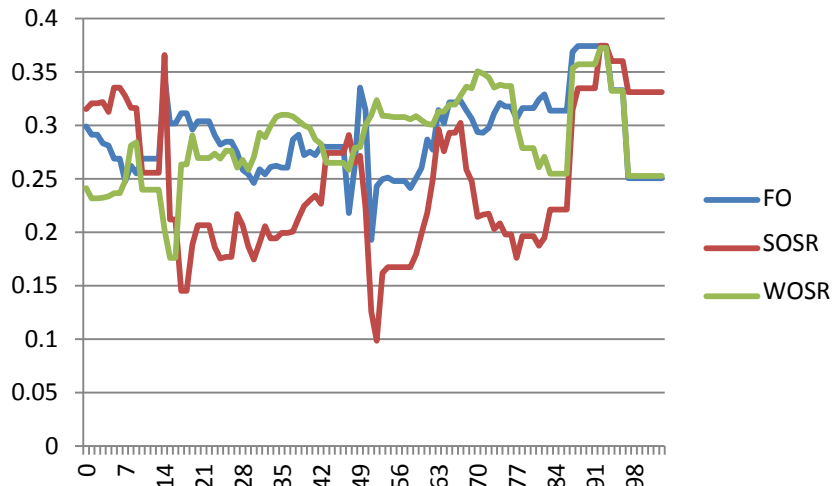

C2

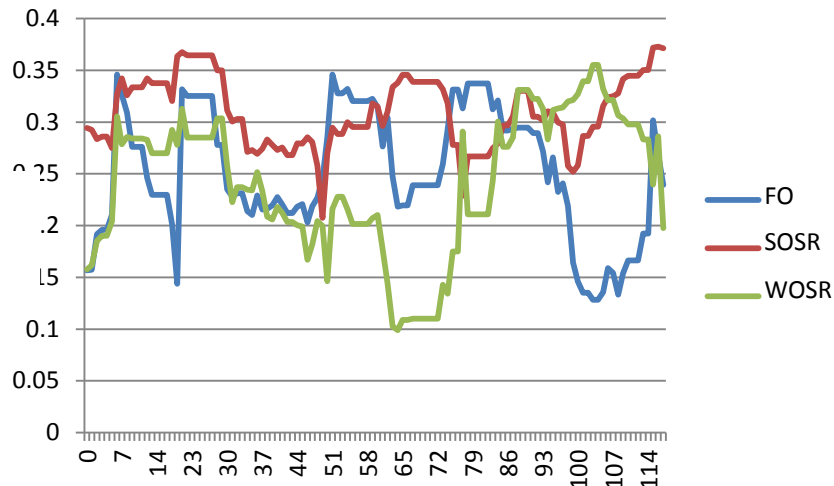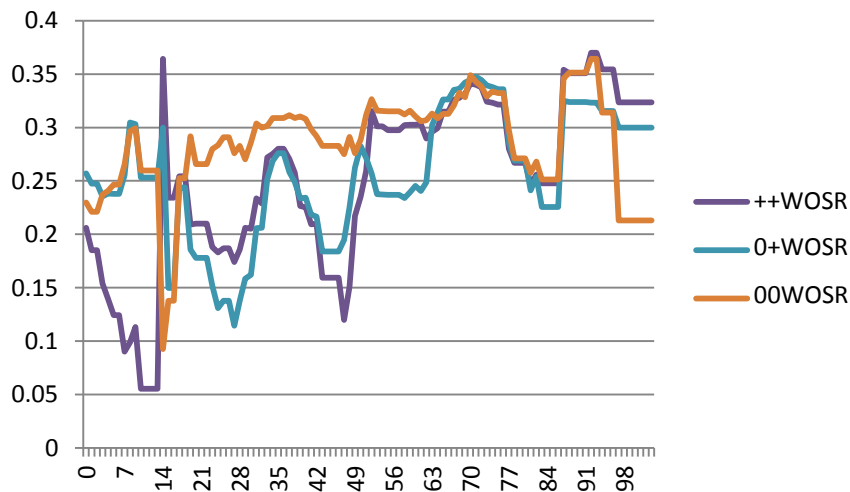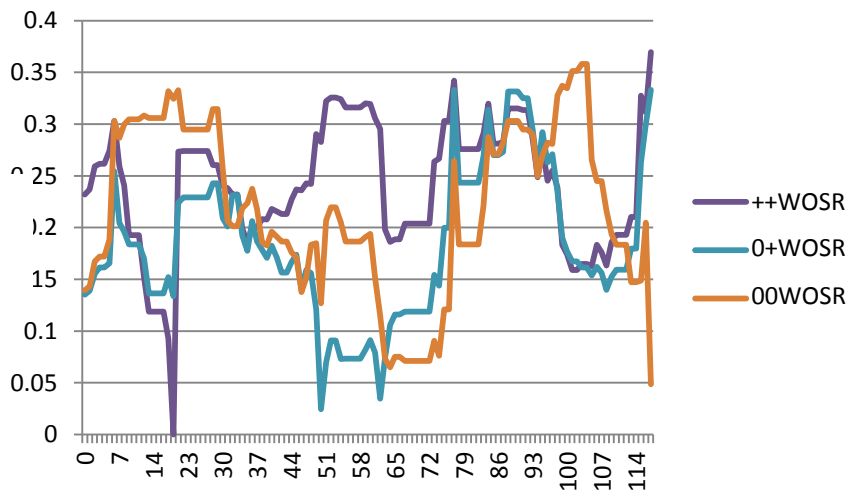

### C3

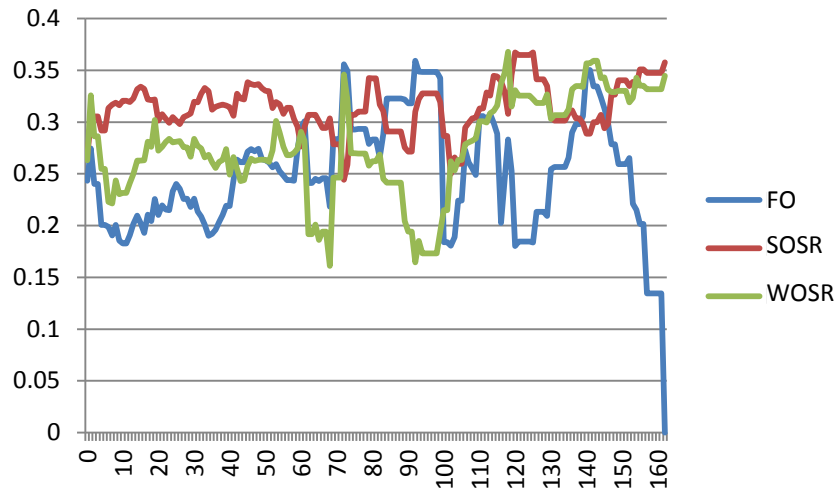

### C4

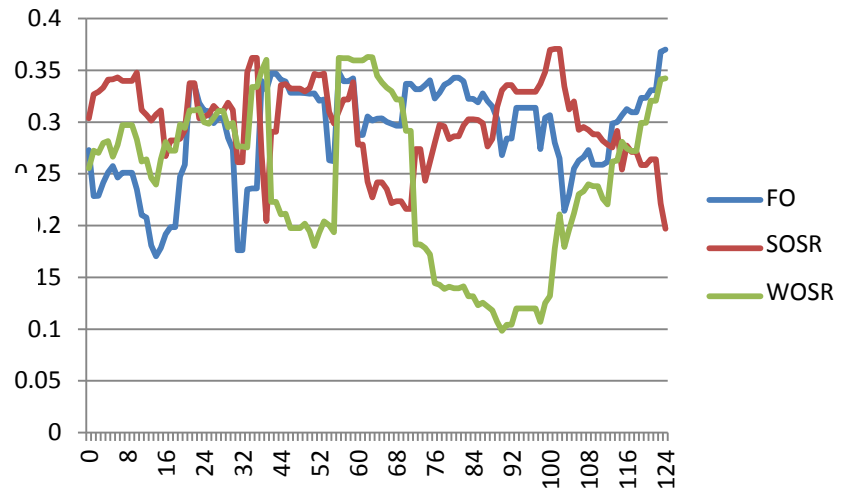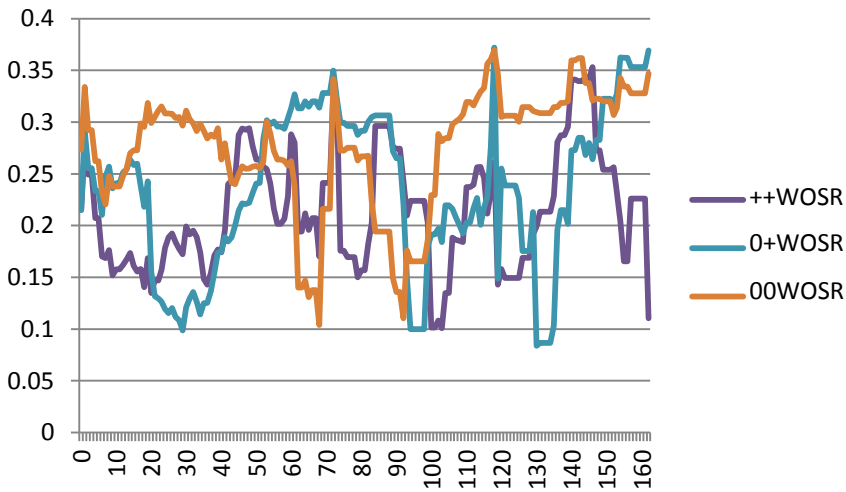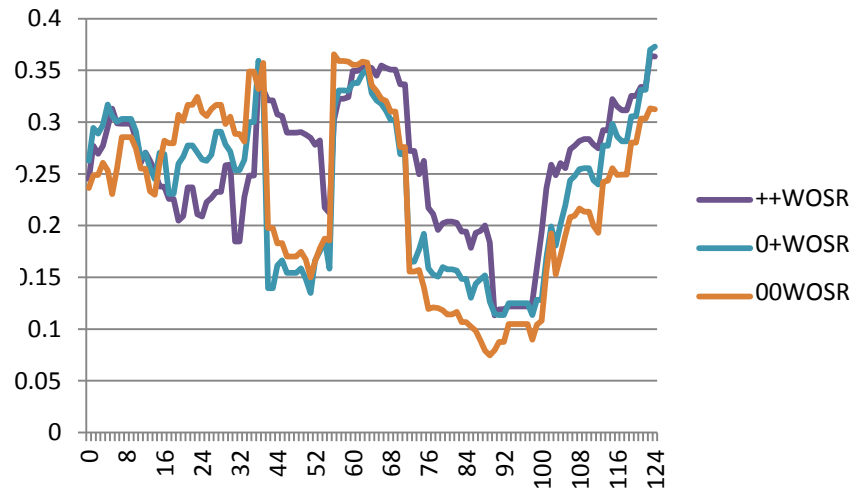

C5

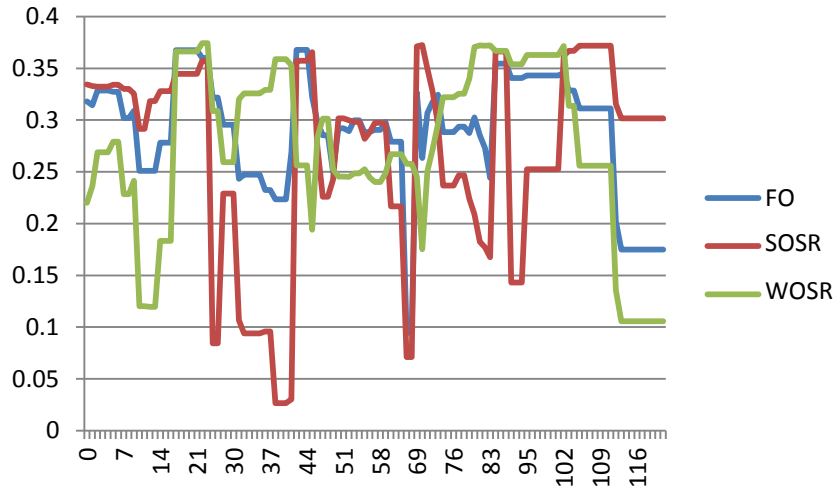

C6

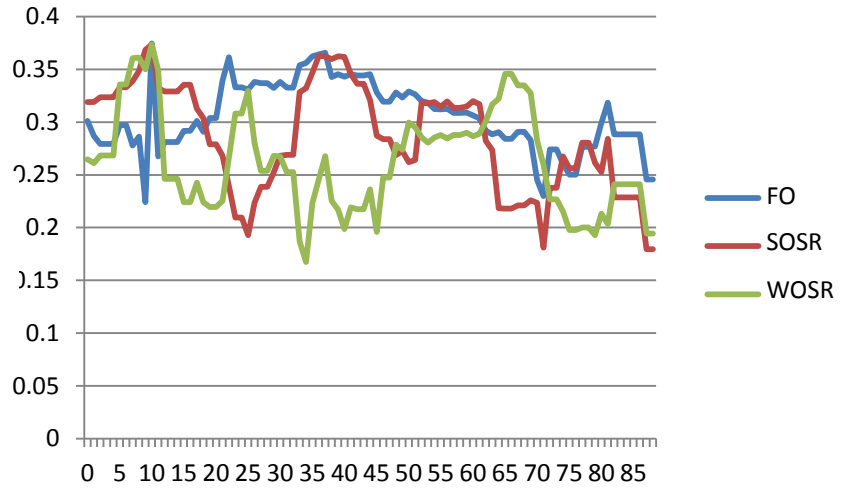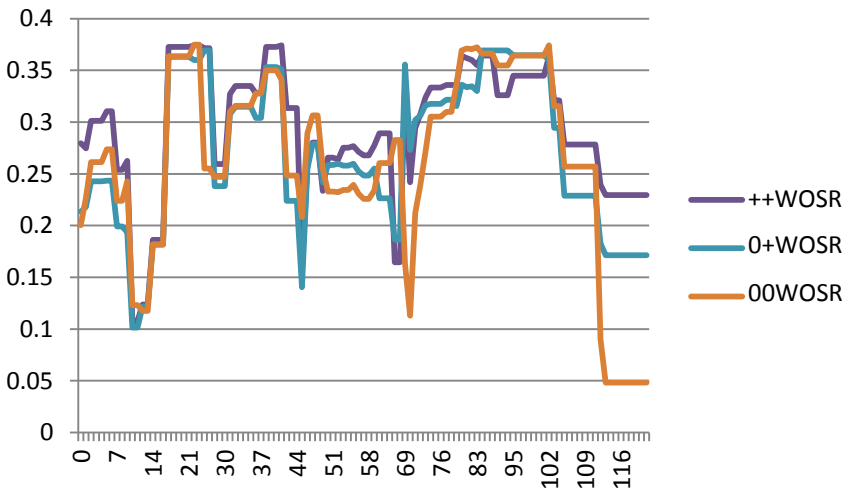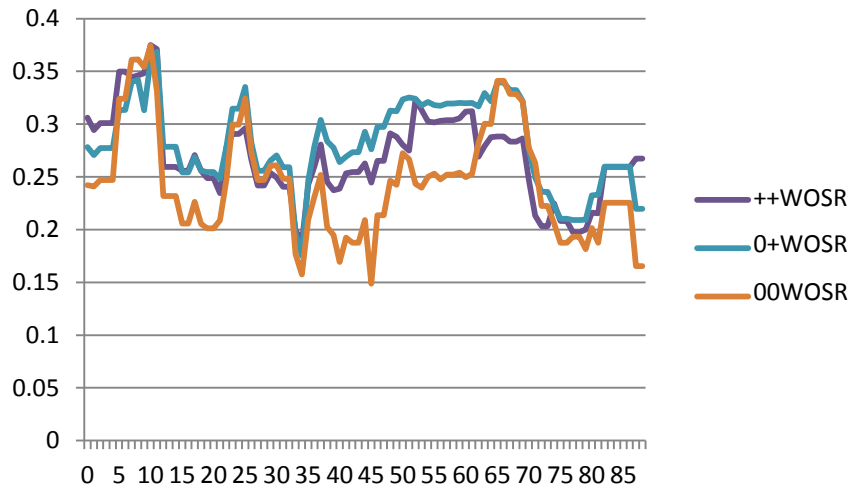



C7

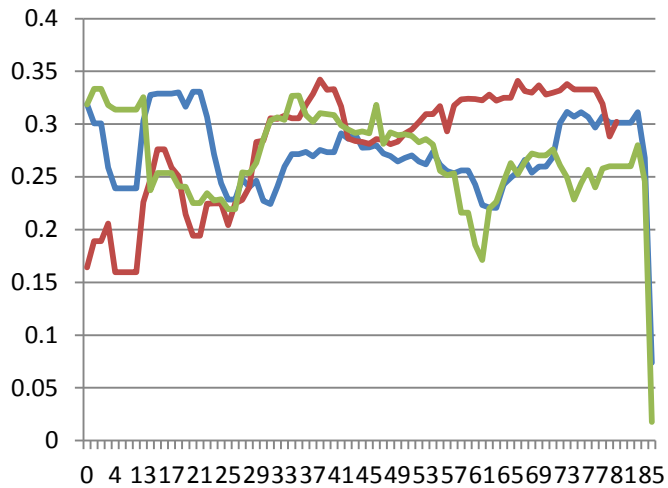

C8

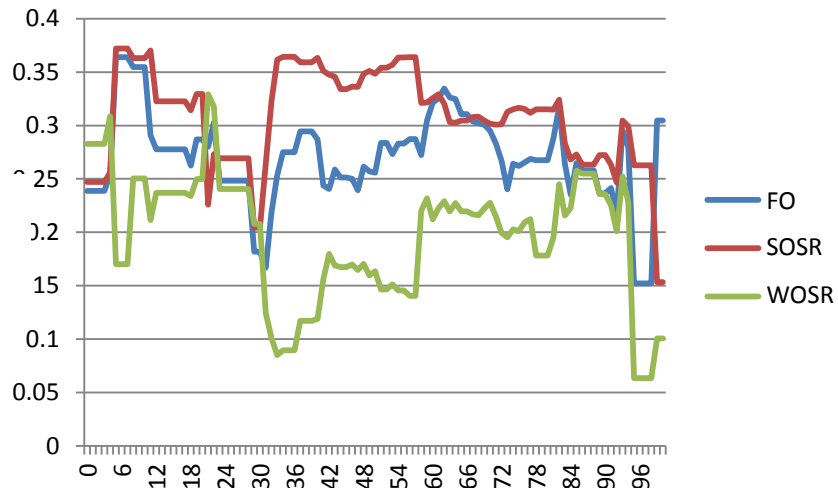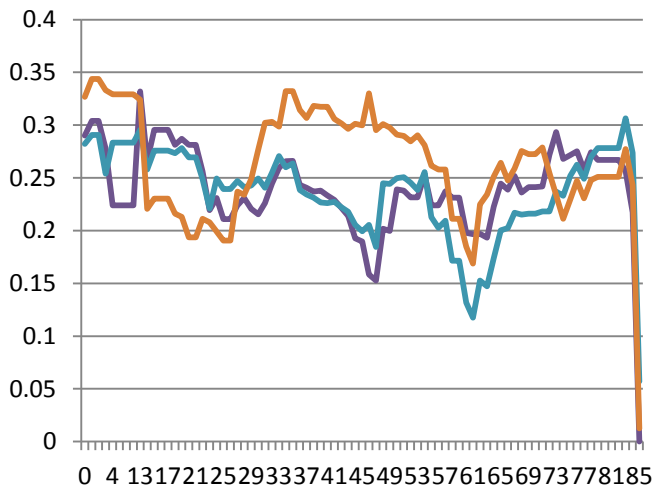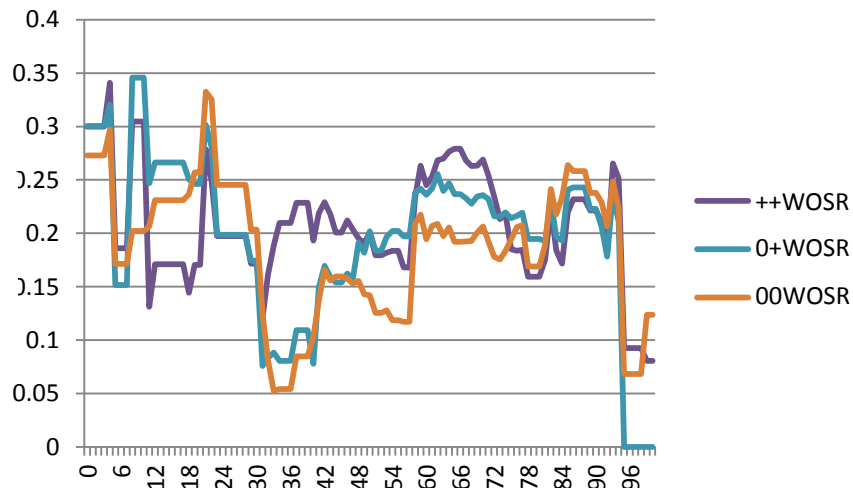

C9

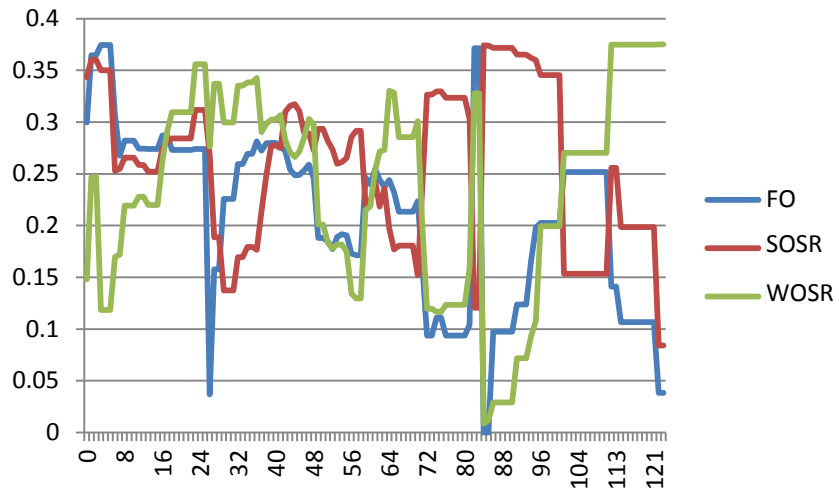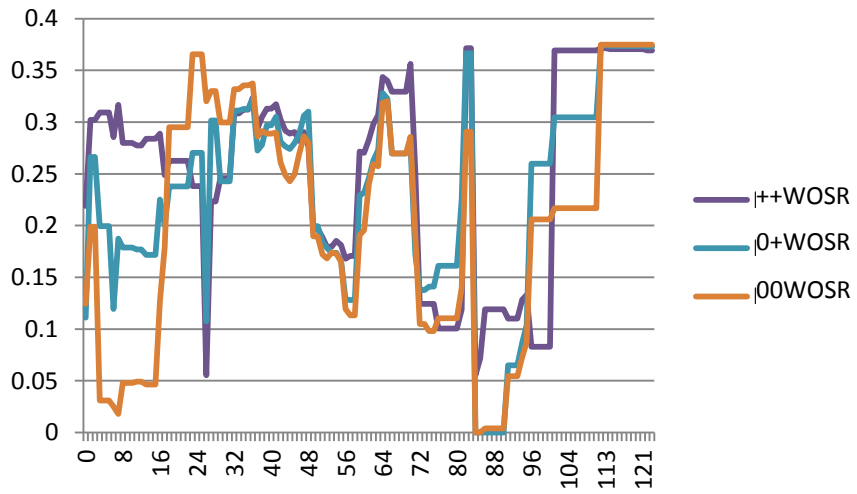

Supplement: 1471-2164-14-120-S7.pdf [file 1471-2164-14-120-S7.pdf]
