# Supplementary material for: High-density SNP-based genetic map development and linkage disequilibrium assessment in Brassica napus L
Source: PubMed Central journal article supplement (PMC3600037; doi:10.1186/1471-2164-14-120), 2013-02-22

**Supplementary figure 4:** Plots of  $r^2$  as a function of genetic distance (in cM) between pairs of SNPs on each linkage group in the whole, spring, winter and « 00 » winter oilseed rape collections. Red curves show the non-linear regressions trend line of  $r^2$  versus genetic distance

**A1 Whole collection**

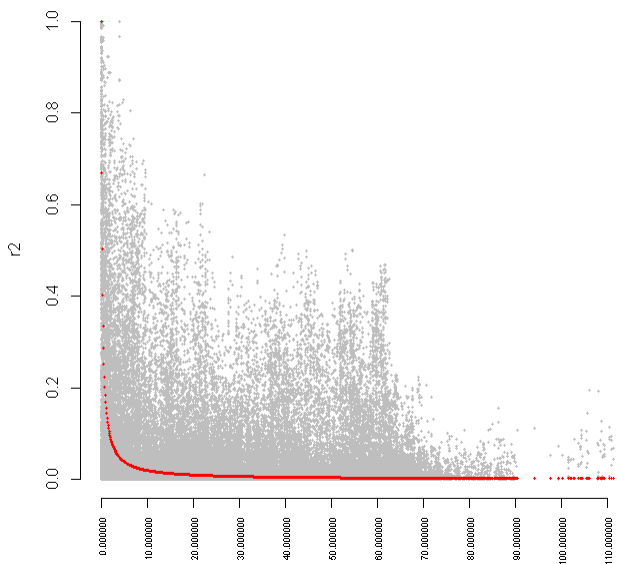

**A1 Spring collection**

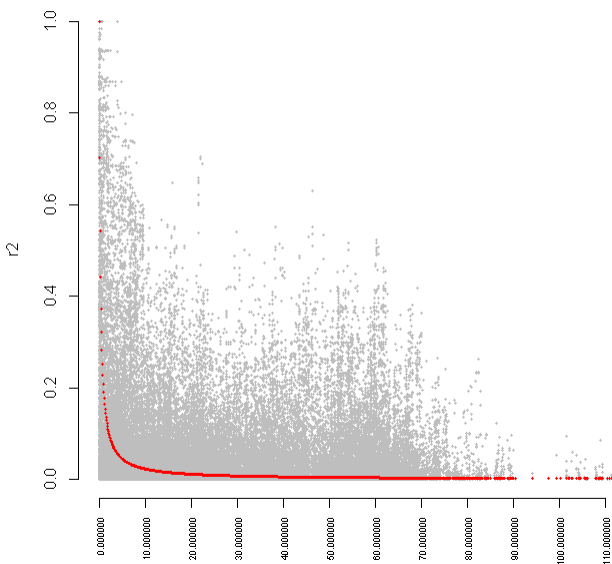

**A1 Winter collection**

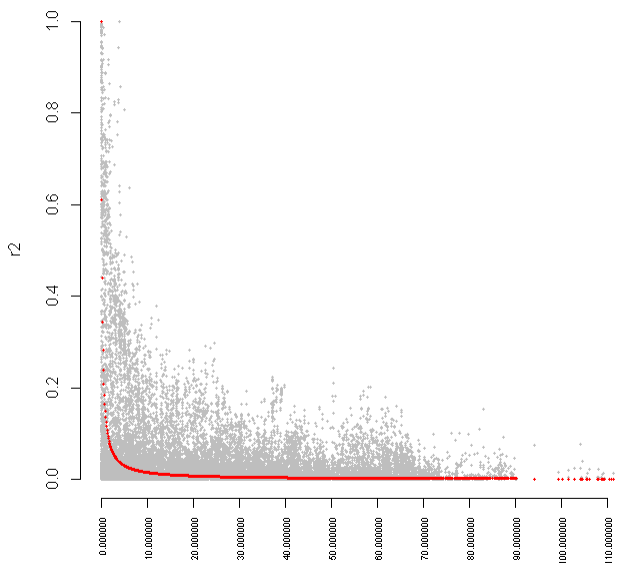

**A1 Winter 00 collection**

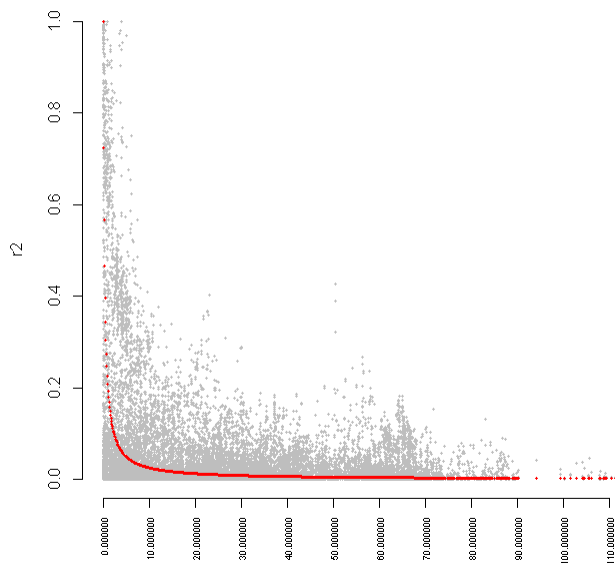

**A2 Whole collection**

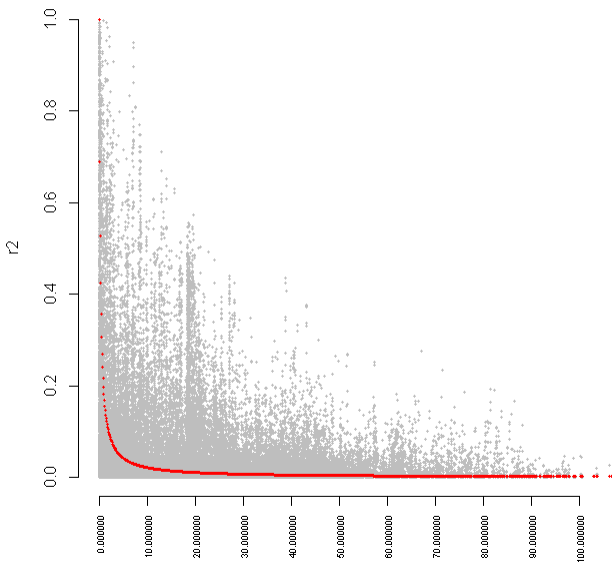

**A2 Spring collection**

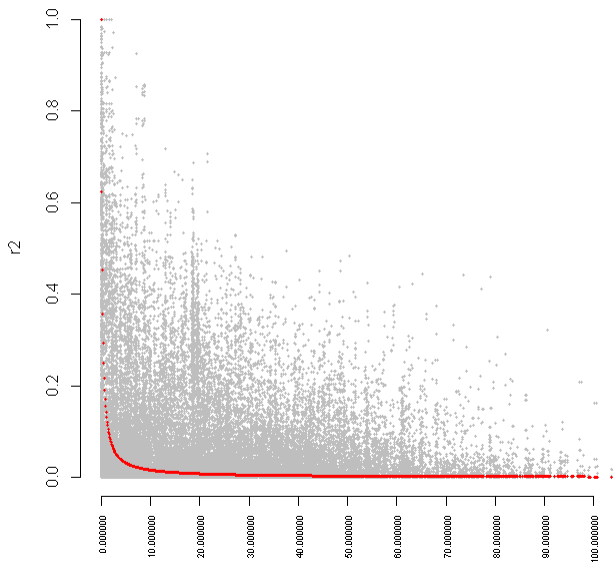

**A2 Winter collection**

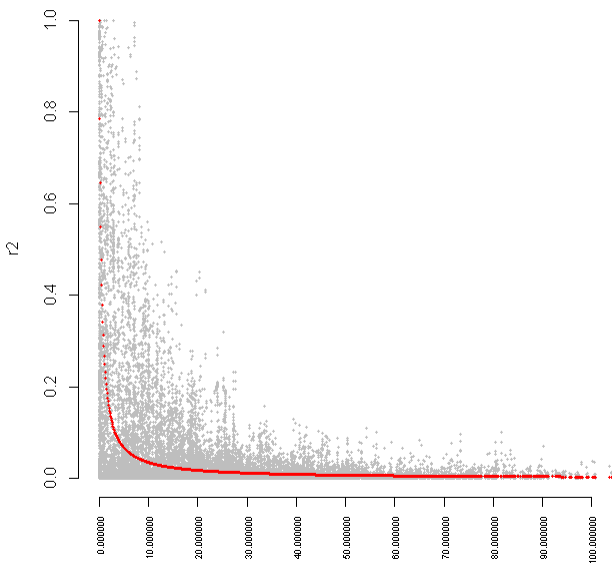

**A2 Winter 00 collection**

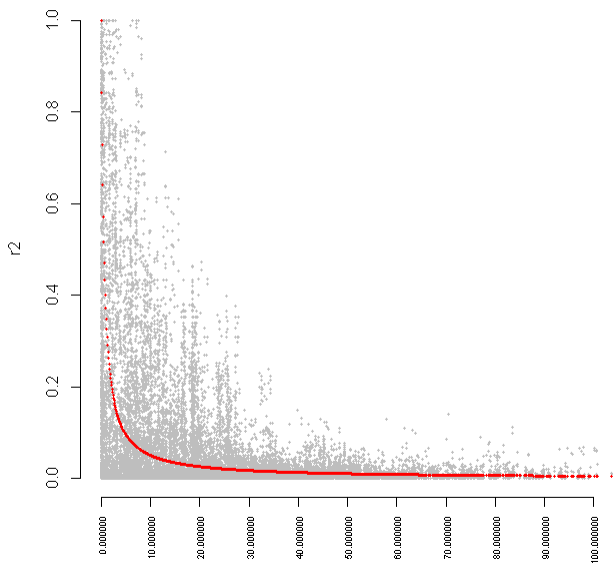

**A3 Whole collection**

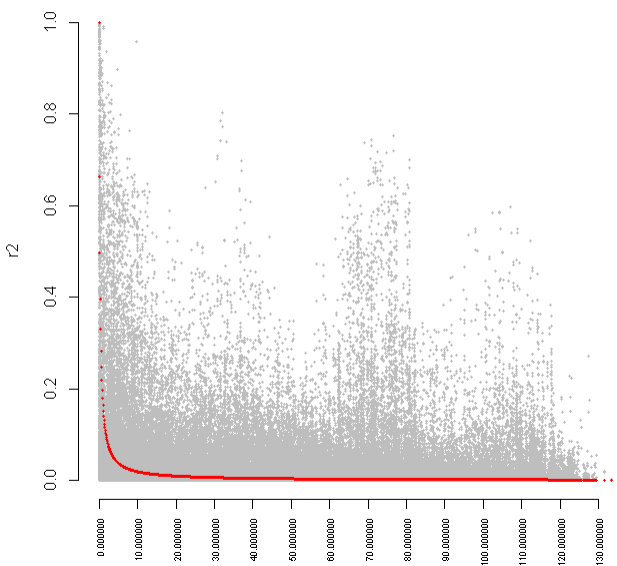

**A3 Spring collection**

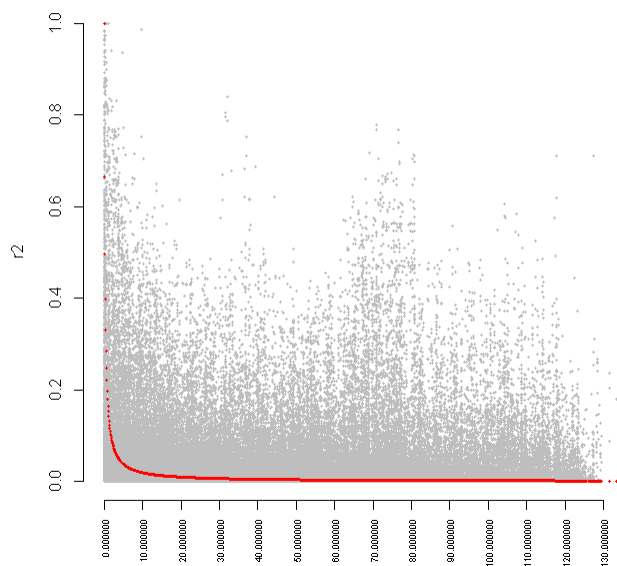

**A3 Winter collection**

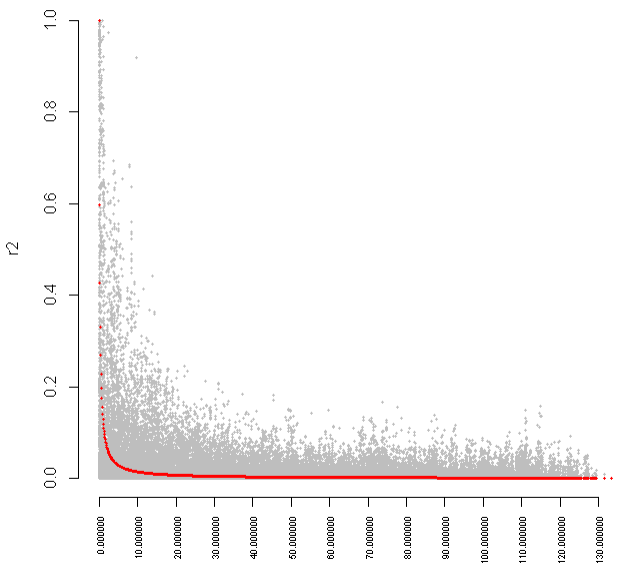

**A3 Winter 00 collection**

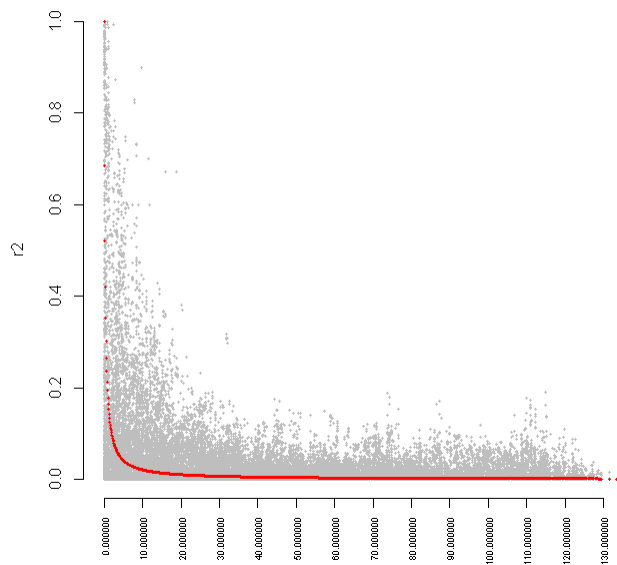

**A4 Whole collection**

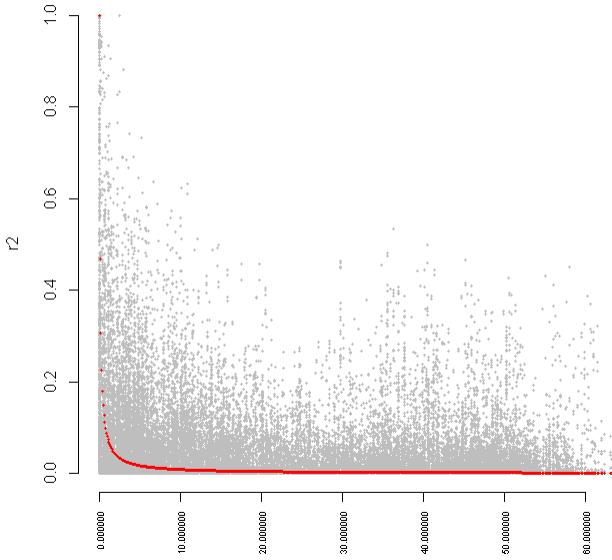

**A4 Spring collection**

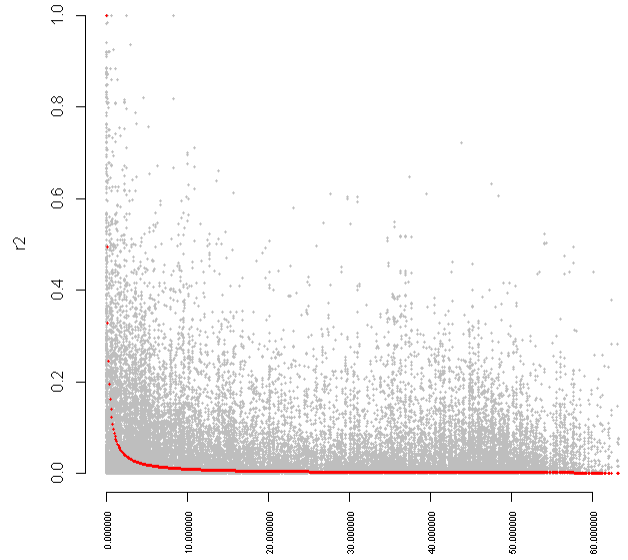

**A4 Winter collection**

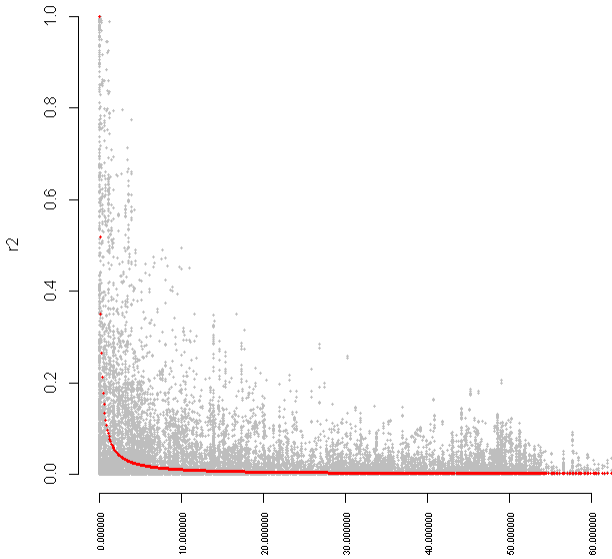

**A4 Winter 00 collection**

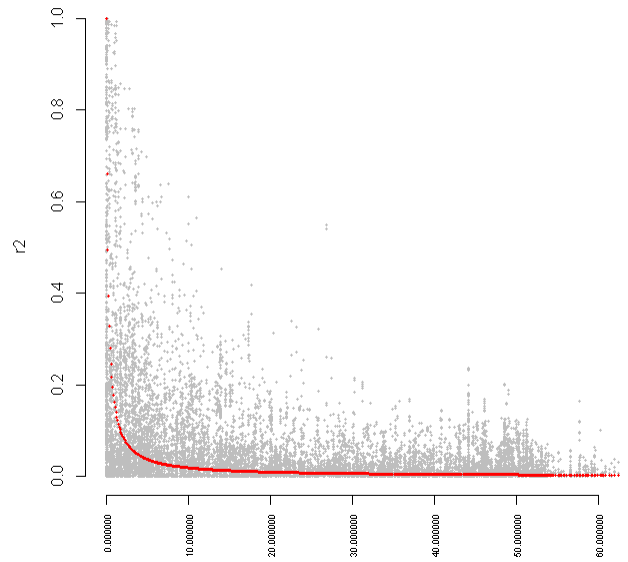

**A5 Whole collection**

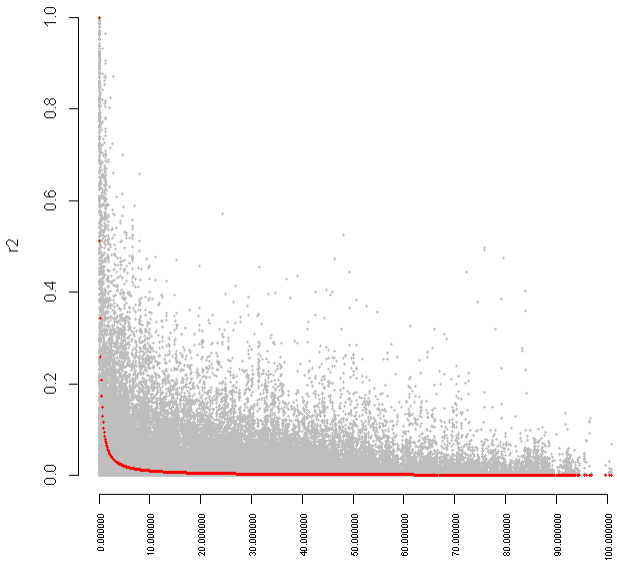

**A5 Spring collection**

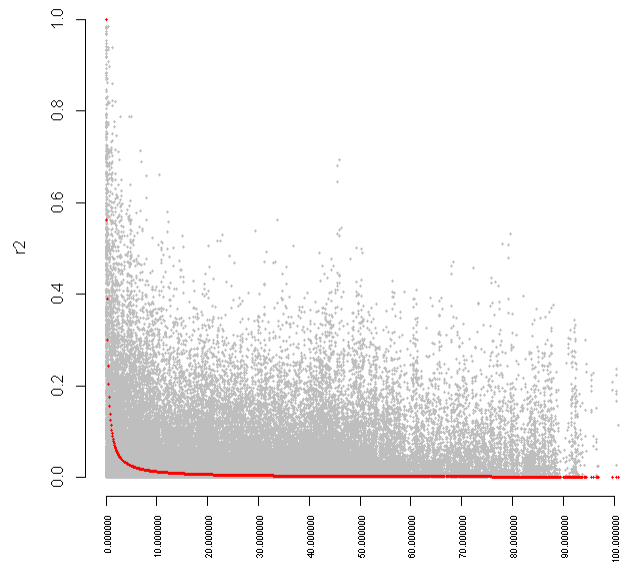

**A5 Winter collection**

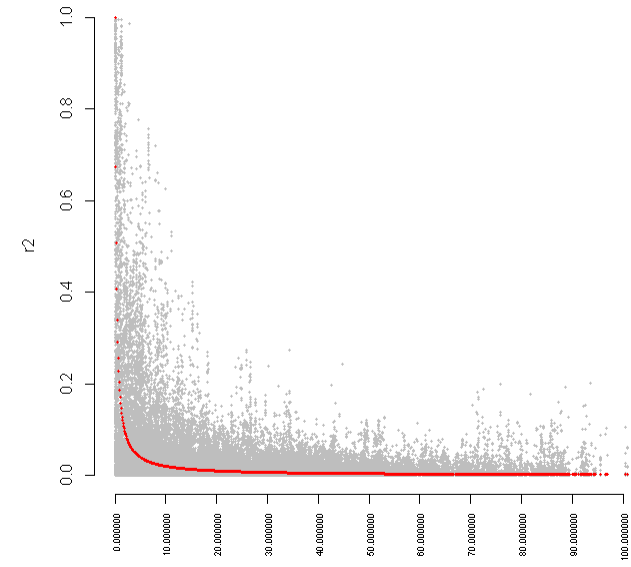

**A5 Winter 00 collection**

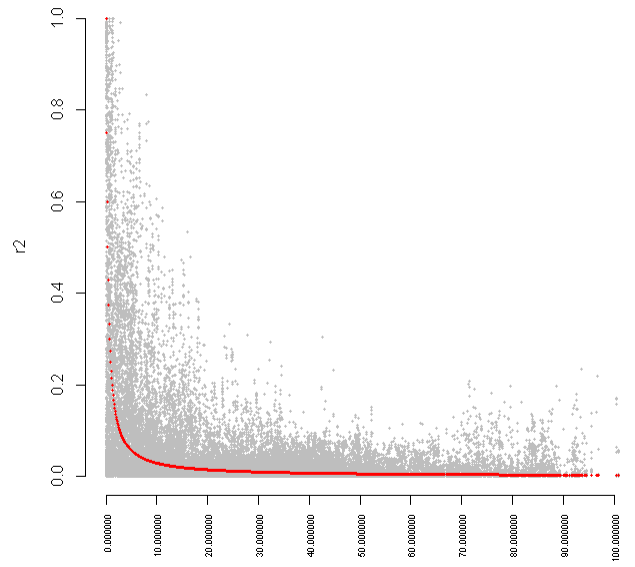

**A6 Whole collection**

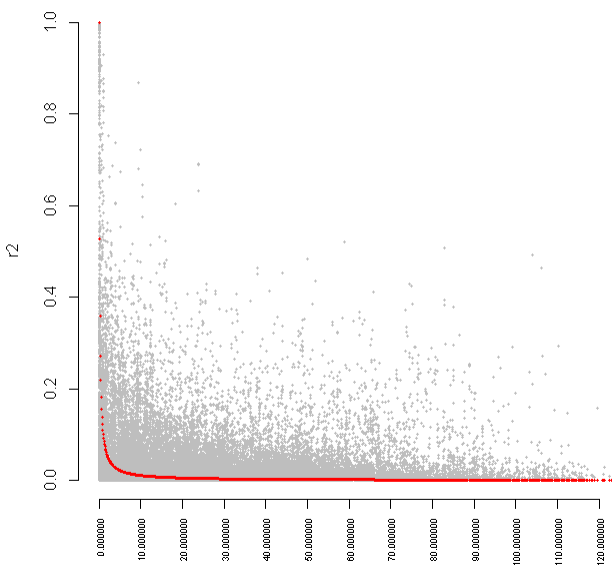

**A6 Spring collection**

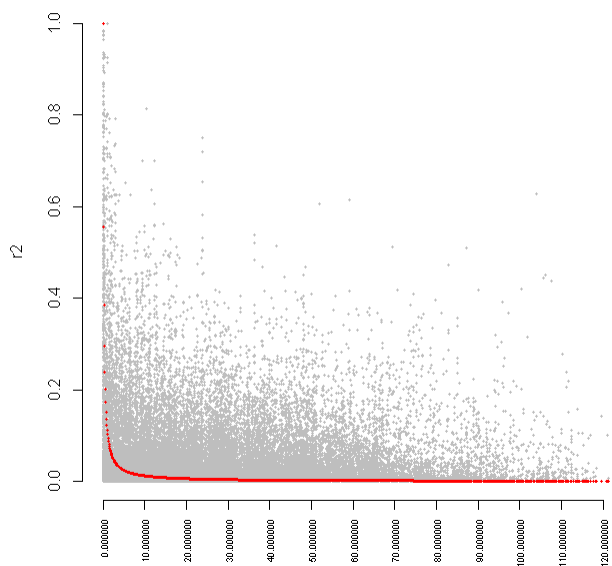

**A6 Winter collection**

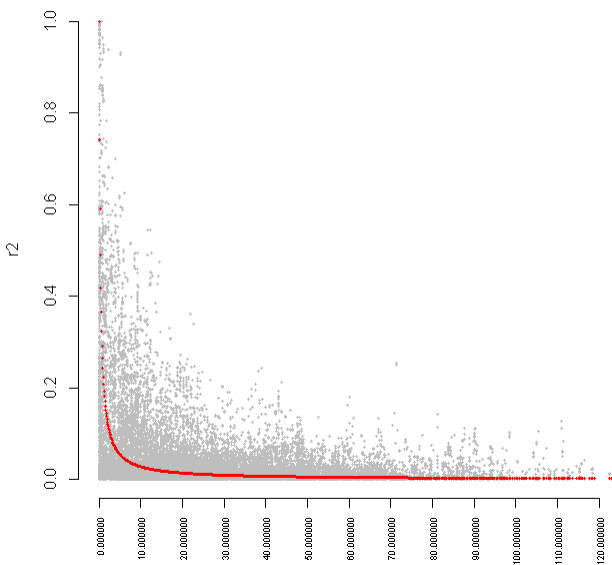

**A6 Winter 00 collection**

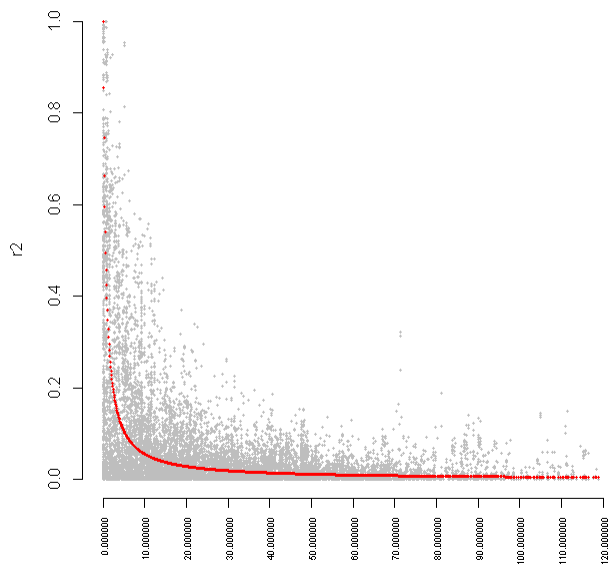

**A7 Whole collection**

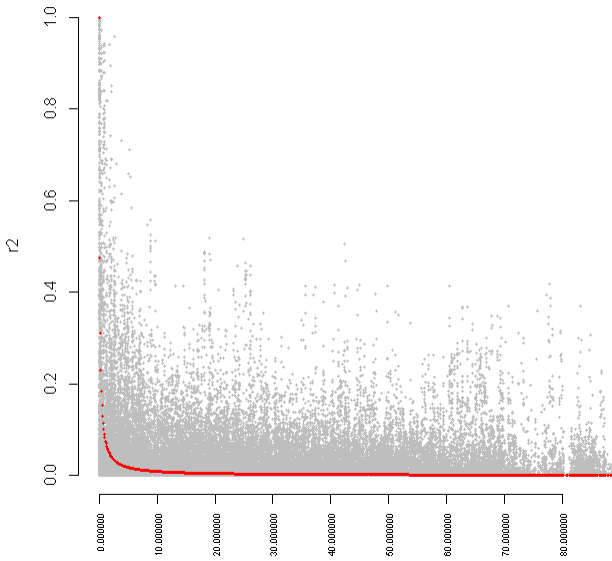

**A7 Spring collection**

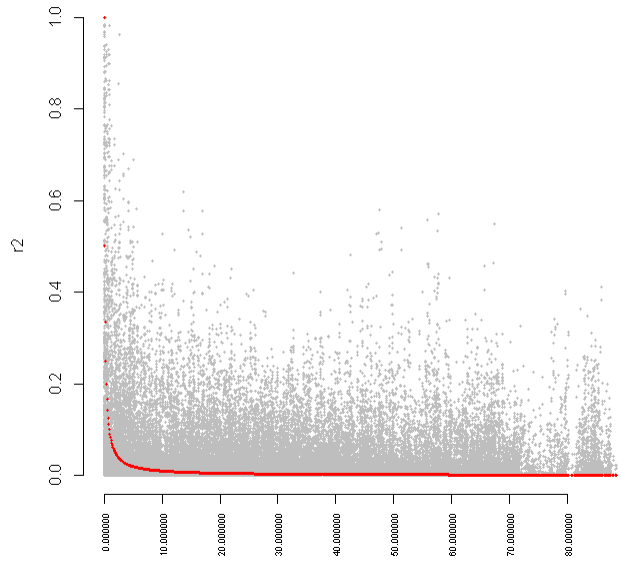

**A7 Winter collection**

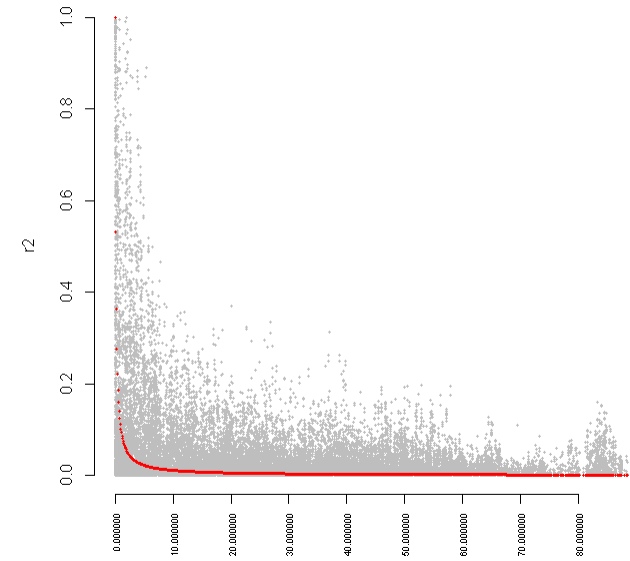

**A7 Winter 00 collection**

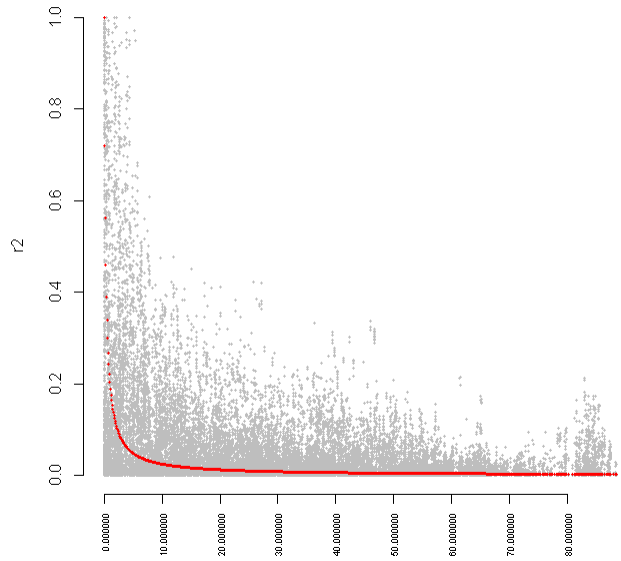

**A8 Whole collection**

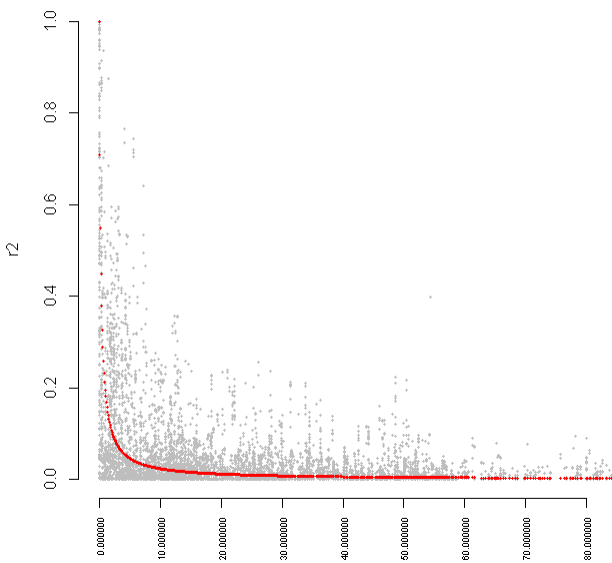

**A8 Spring collection**

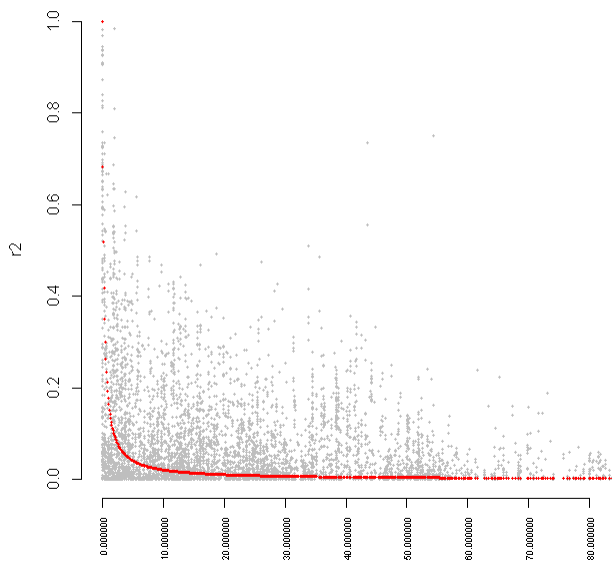

**A8 Winter collection**

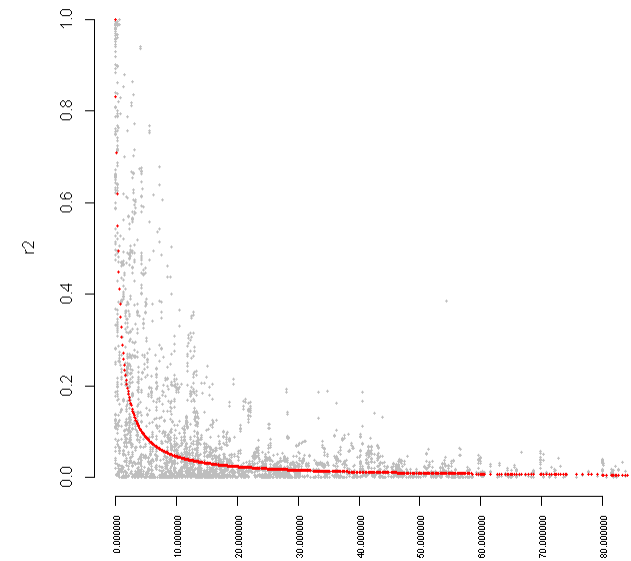

**A8 Winter 00 collection**

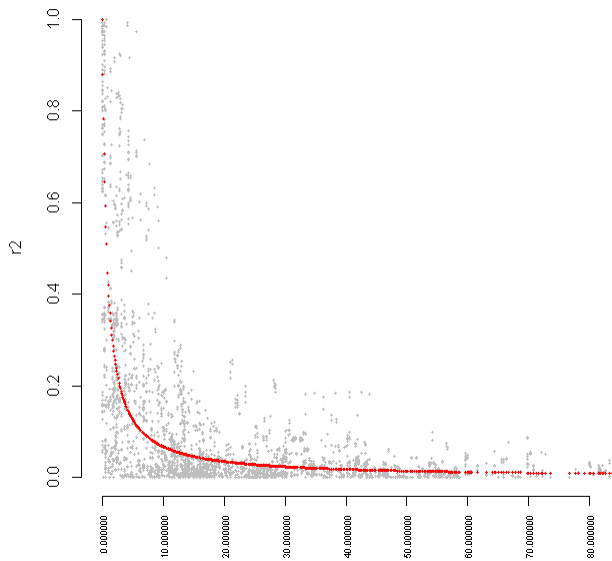



**A9 Whole collection**

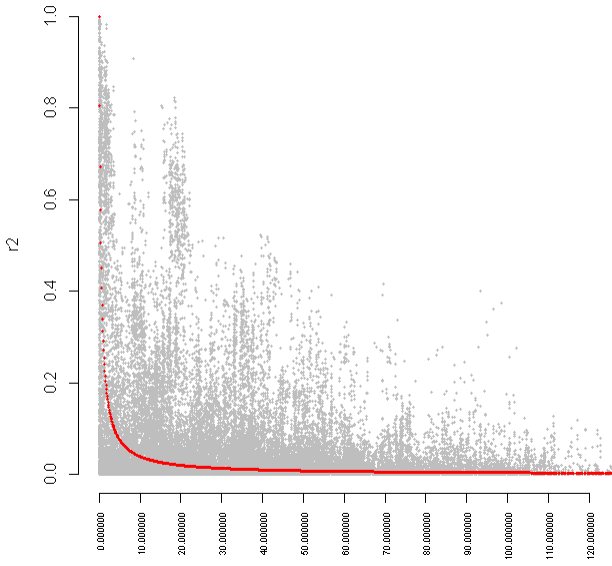

**A9 Spring collection**

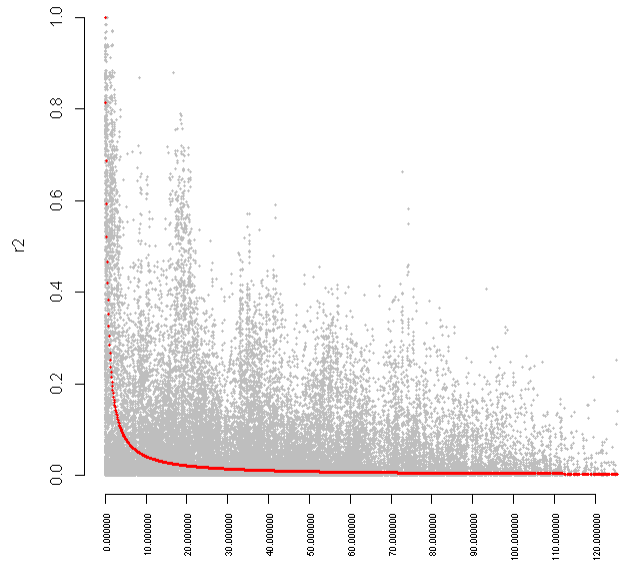

**A9 Winter collection**

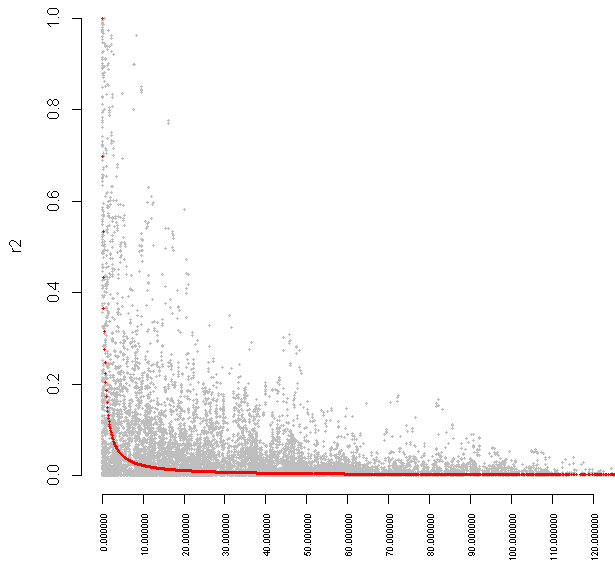

**A9 Winter 00 collection**

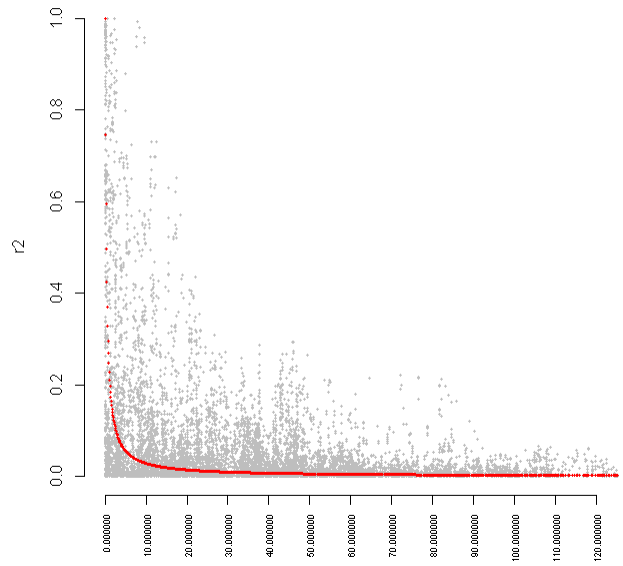

**A10 Whole collection**

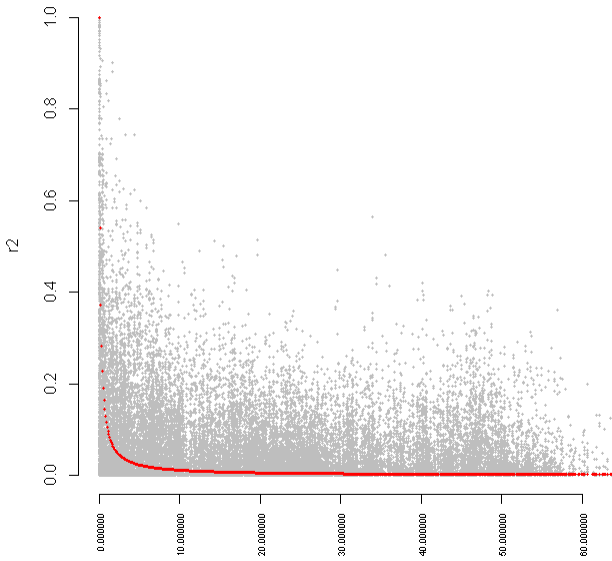

**A10 Spring collection**

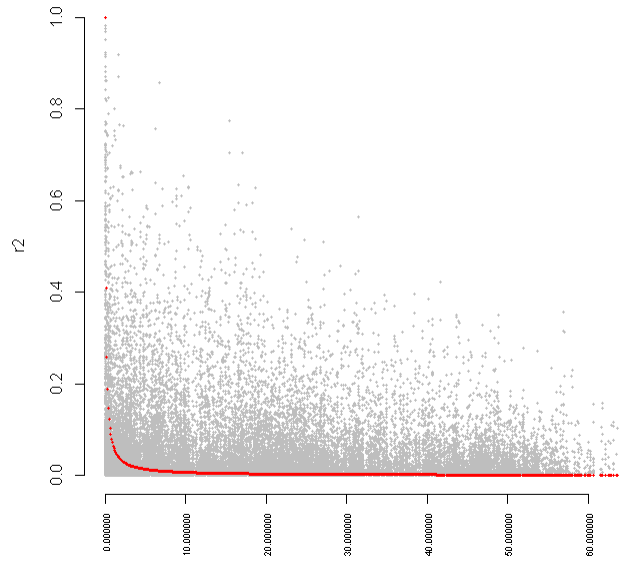

**A10 Winter collection**

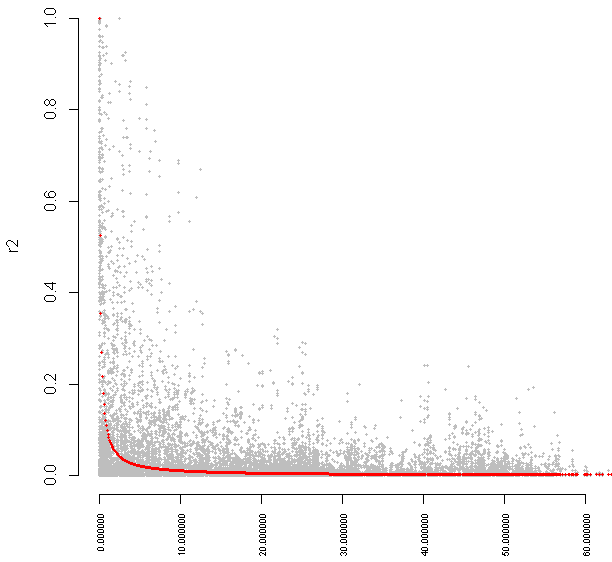

**A10 Winter 00 collection**

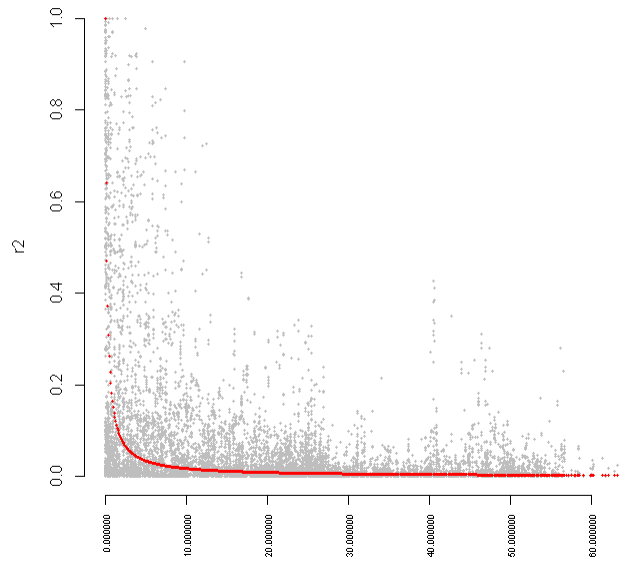

**C1 Whole collection**

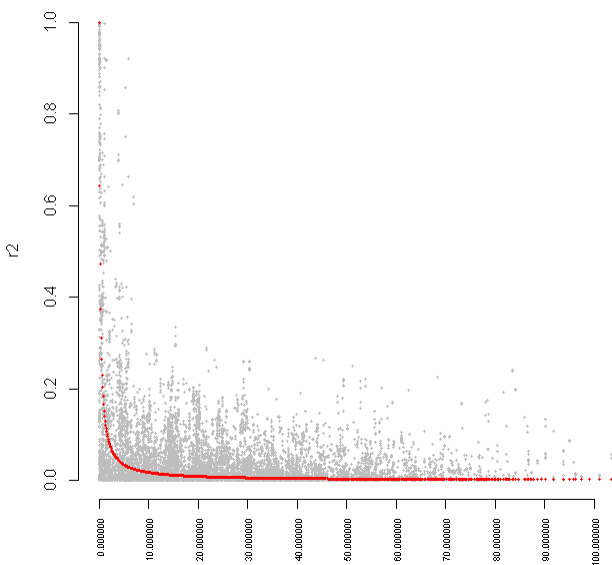

**C1 Spring collection**

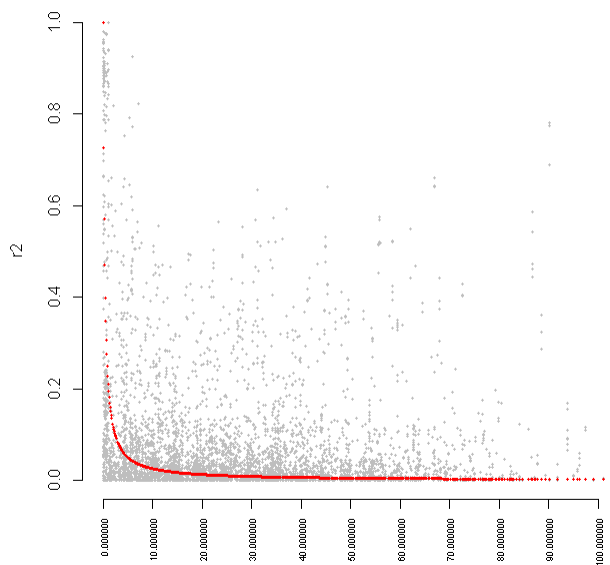

**C1 Winter collection**

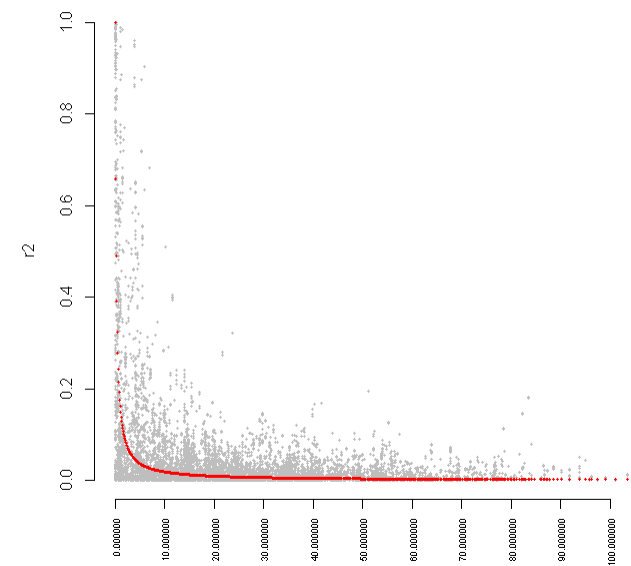

**C1 Winter 00 collection**

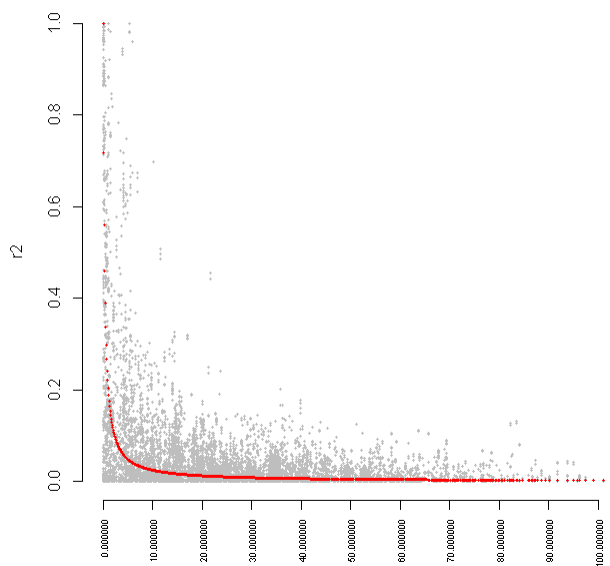

**C2 Whole collection**

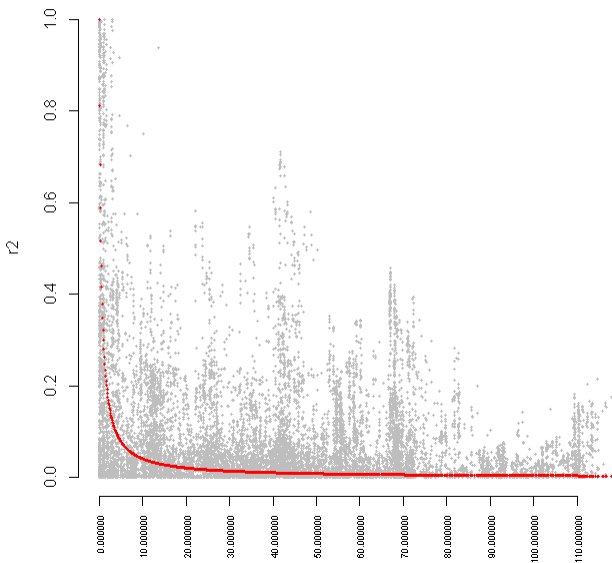

**C2 Spring collection**

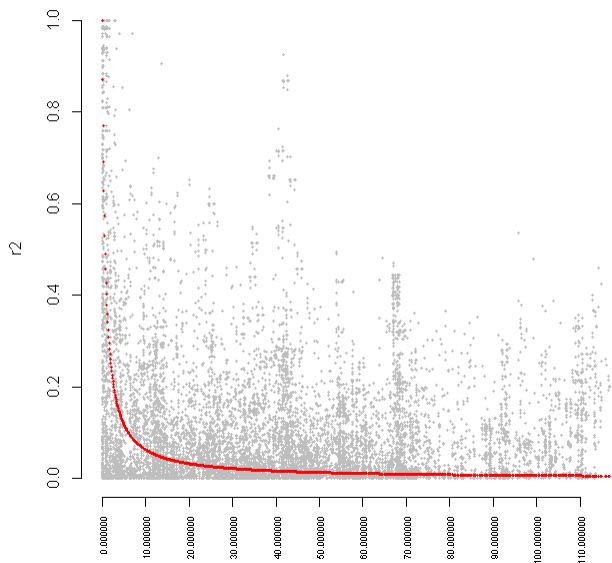

**C2 Winter collection**

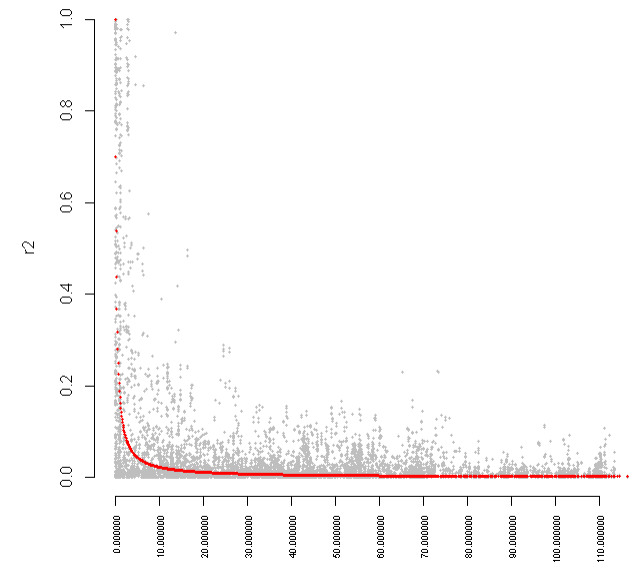

**C2 Winter 00 collection**

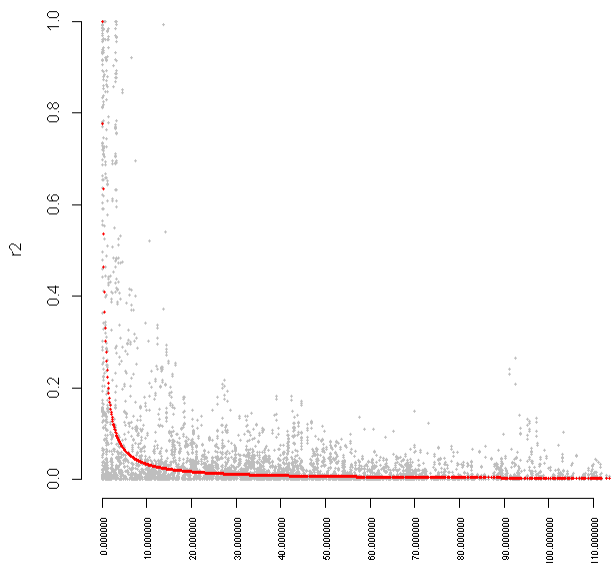

**C3 Whole collection**

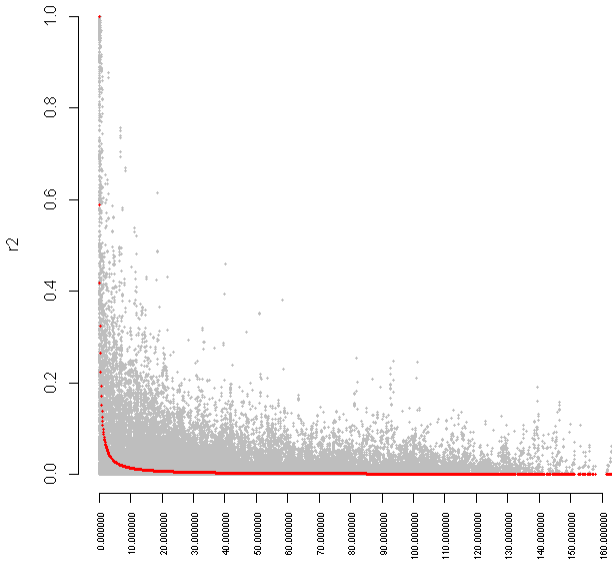

**C3 Spring collection**

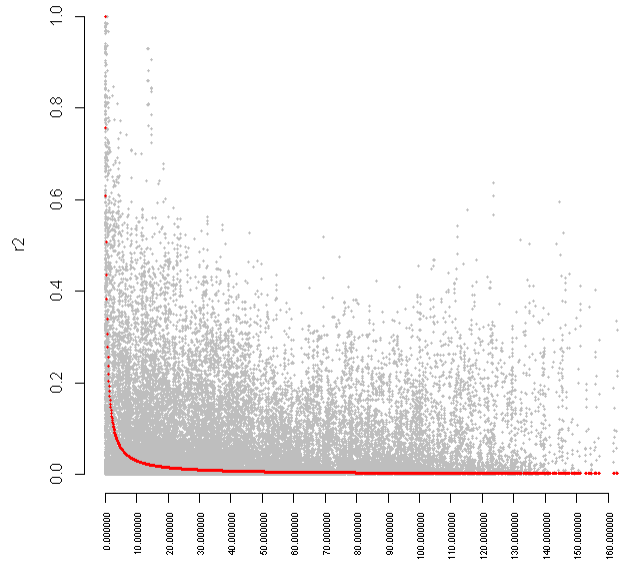

**C3 Winter collection**

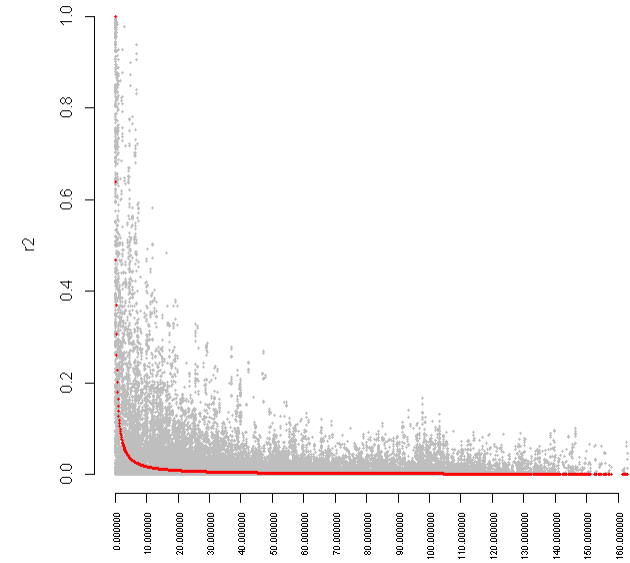

**C3 Winter 00 collection**

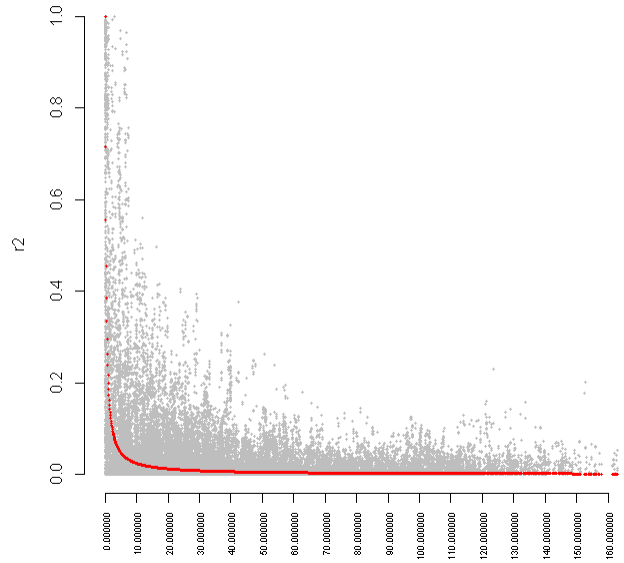

**C4 Whole collection**

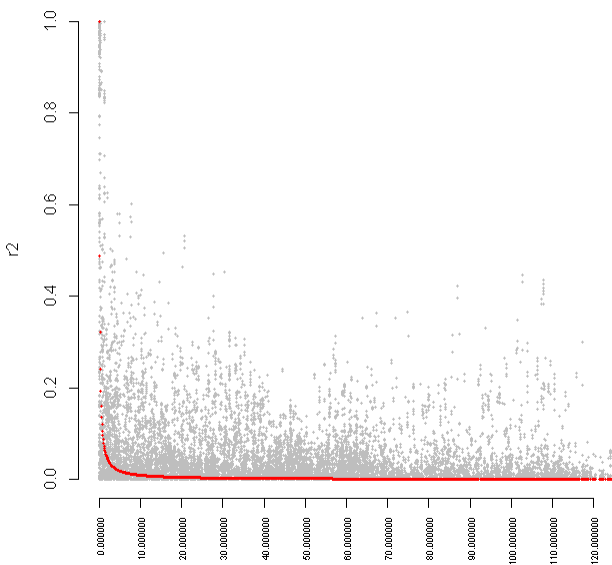

**C4 Spring collection**

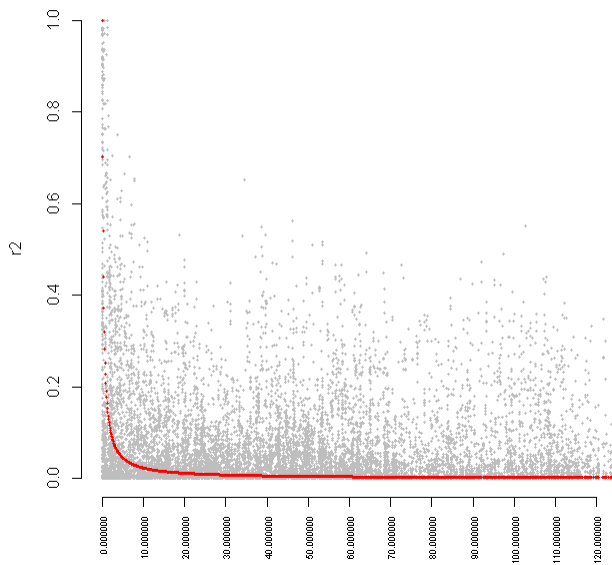

**C4 Winter collection**

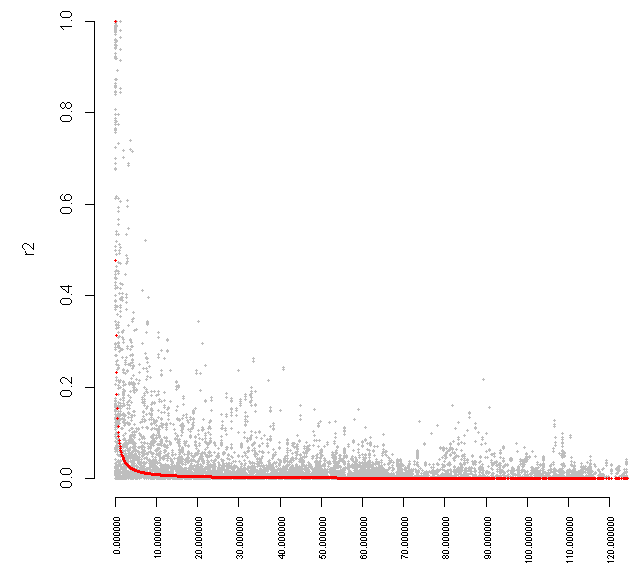

**C4 Winter 00 collection**

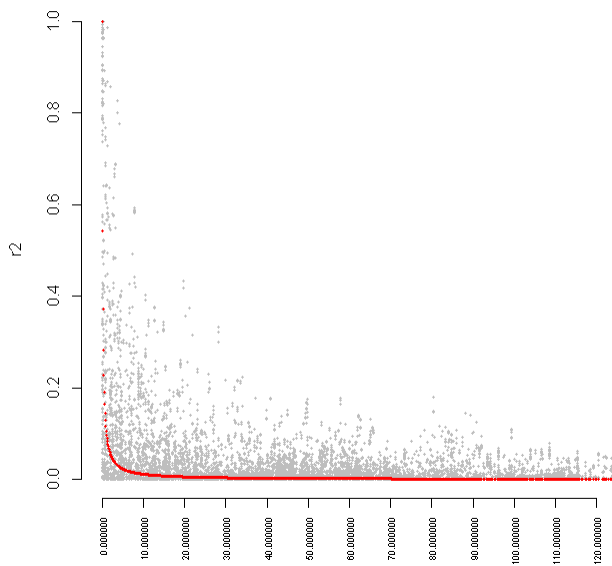

**C5 Whole collection**

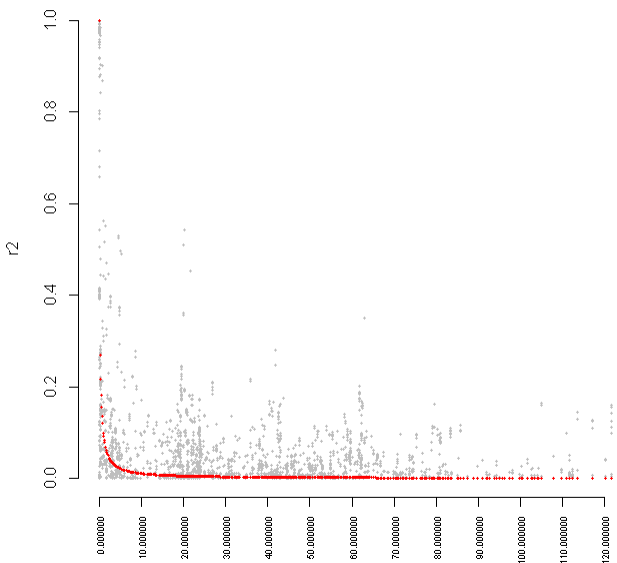

**C5 Spring collection**

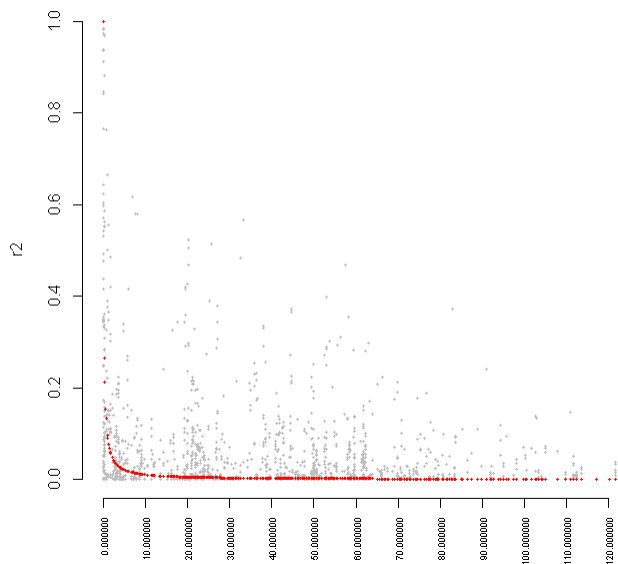

**C5 Winter collection**

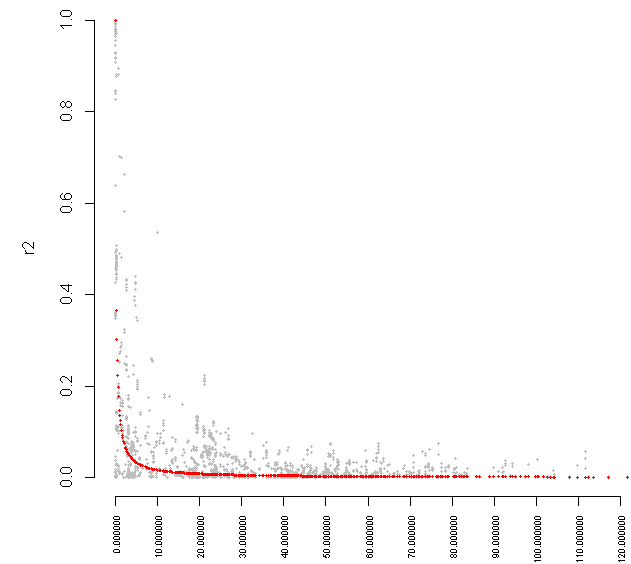

**C5 Winter 00 collection**

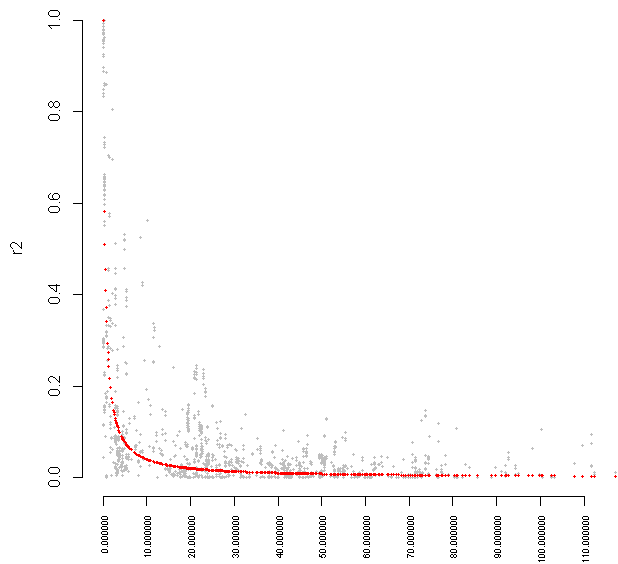

**C6 Whole collection**

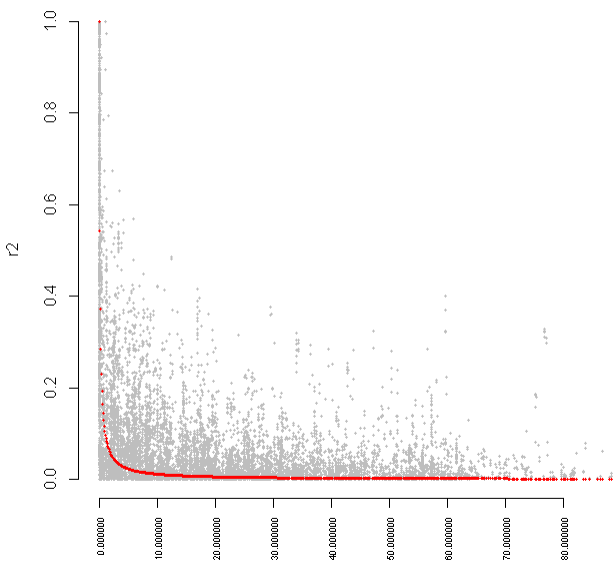

**C6 Spring collection**

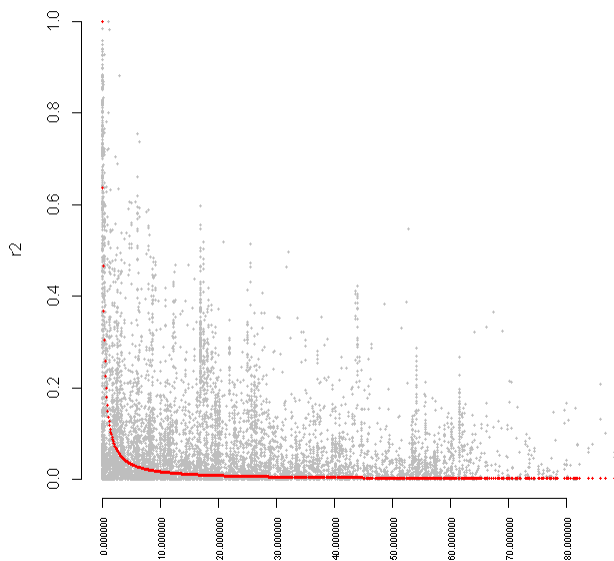

**C6 Winter collection**

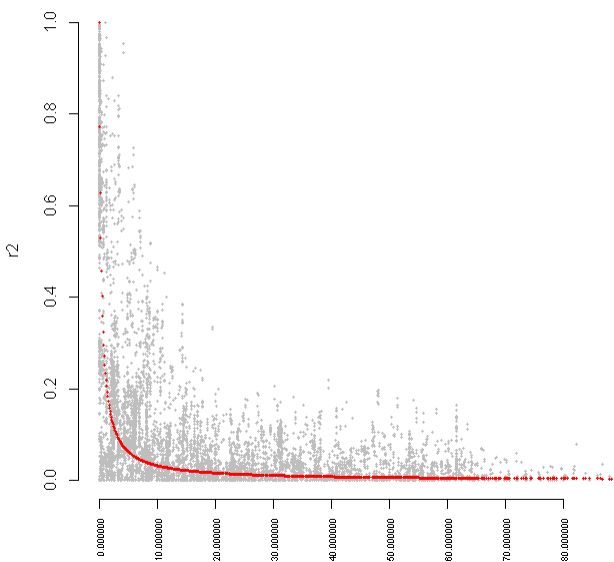

**C6 Winter 00 collection**

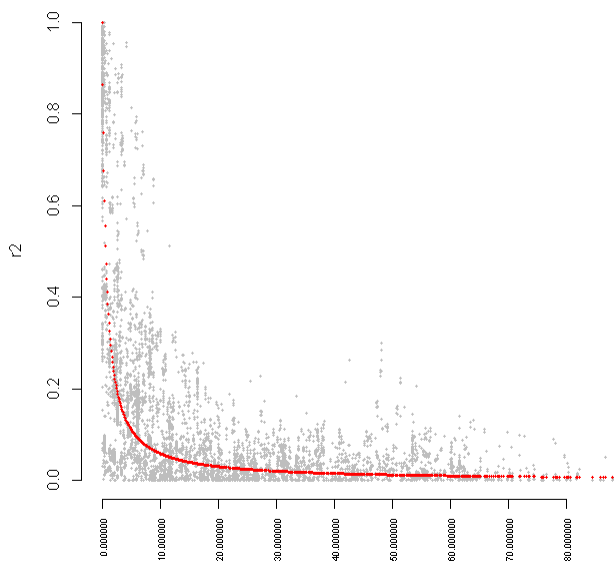



**C7 Whole collection**

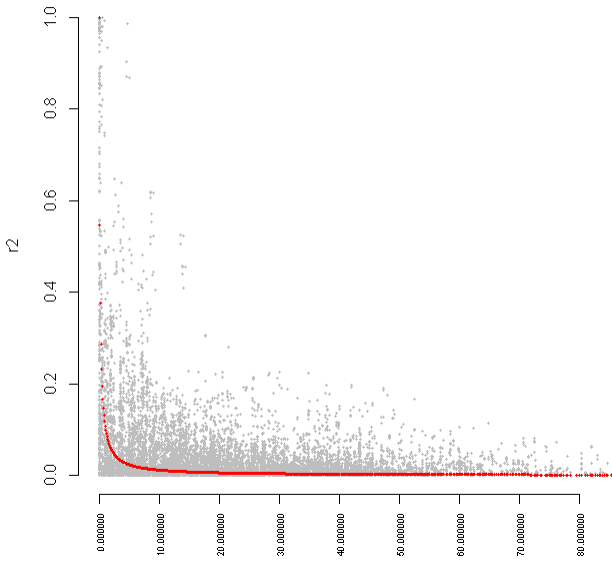

**C7 Spring collection**

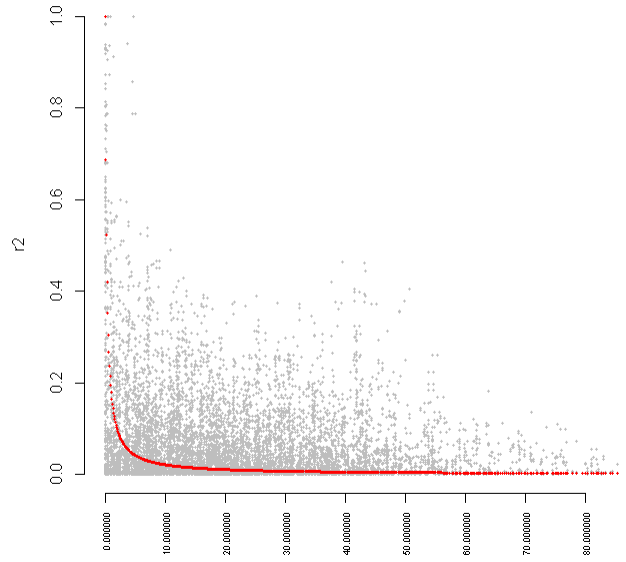

**C7 Winter collection**

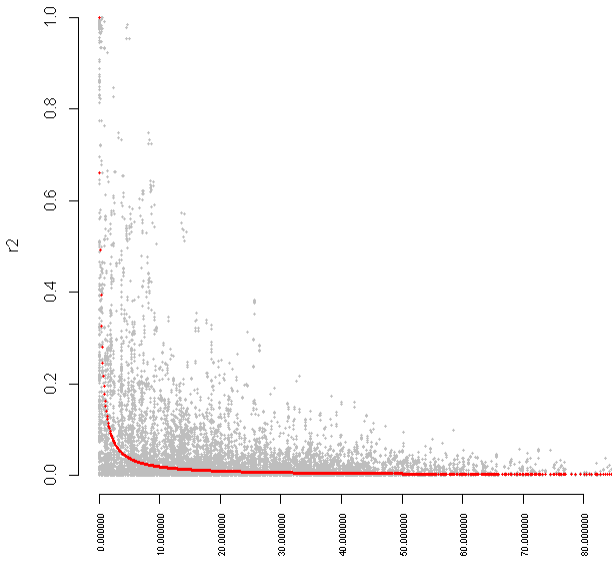

**C7 Winter 00 collection**

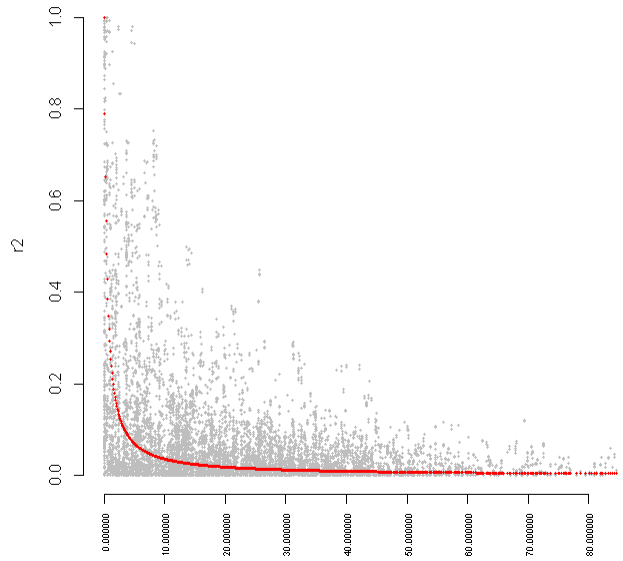

**C8 Whole collection**

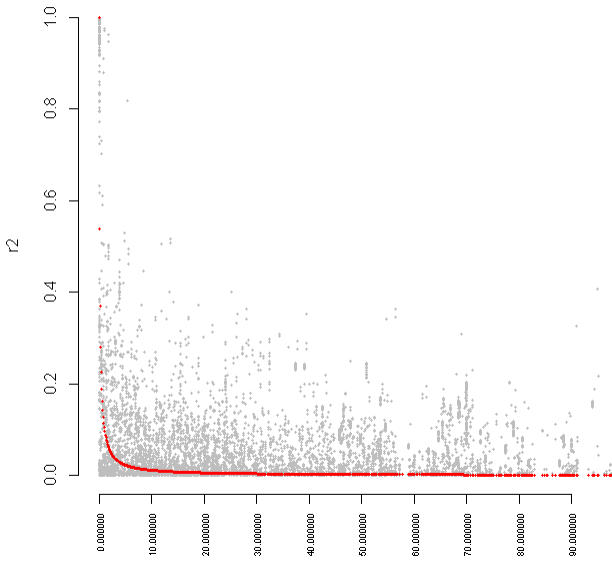

**C8 Spring collection**

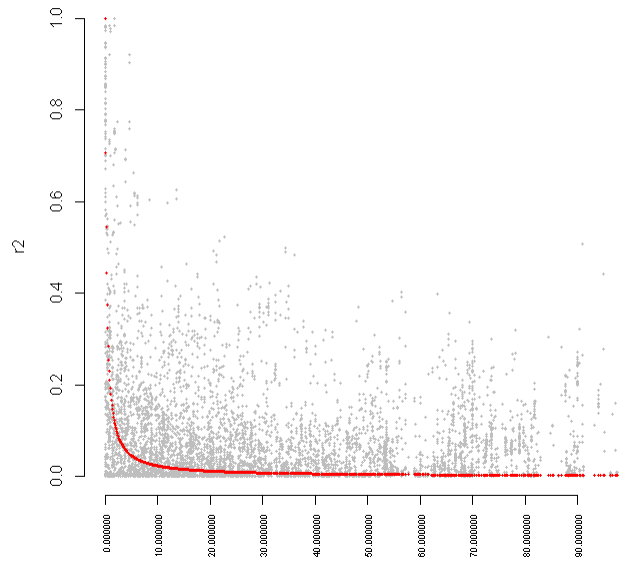

**C8 Winter collection**

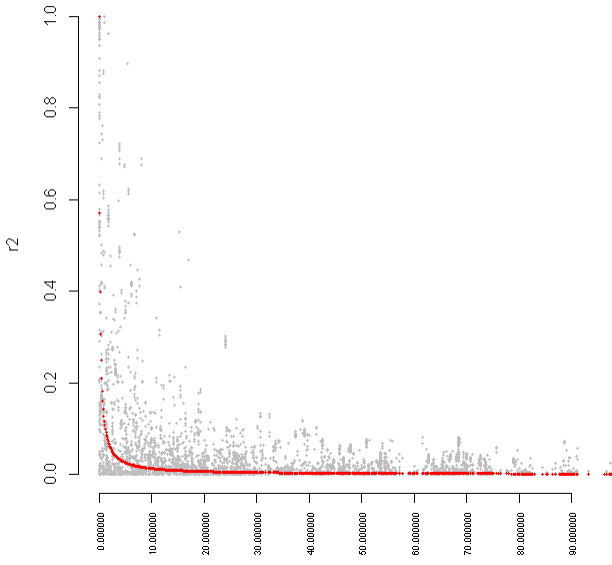

**C8 Winter 00 collection**

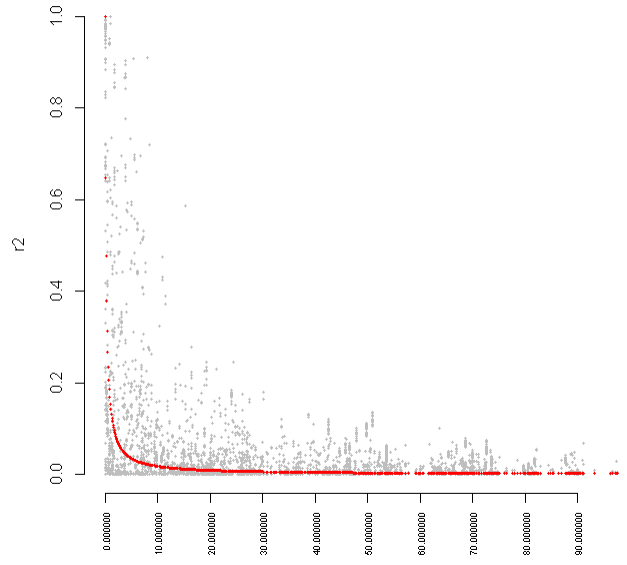

**C9 Whole collection**

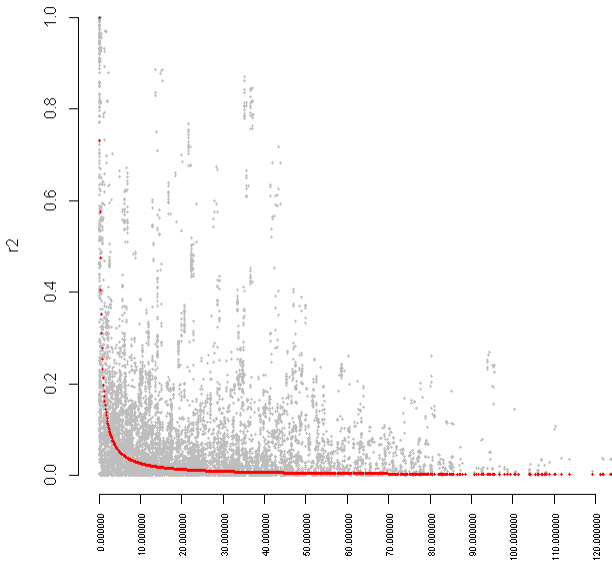

**C9 Spring collection**

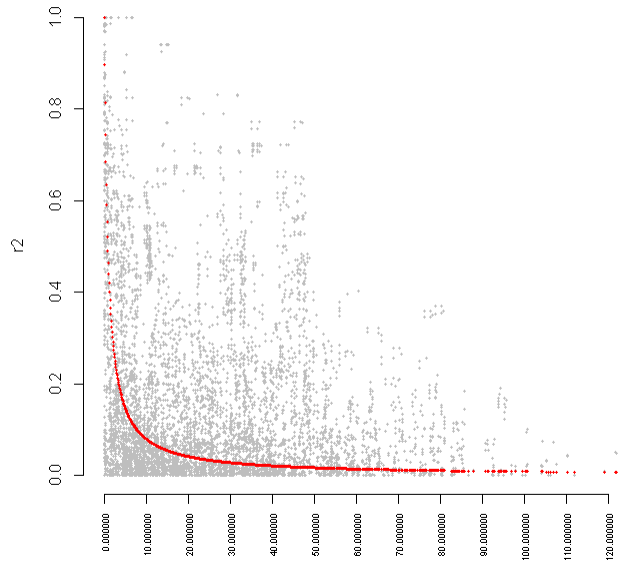

**C9 Winter collection**

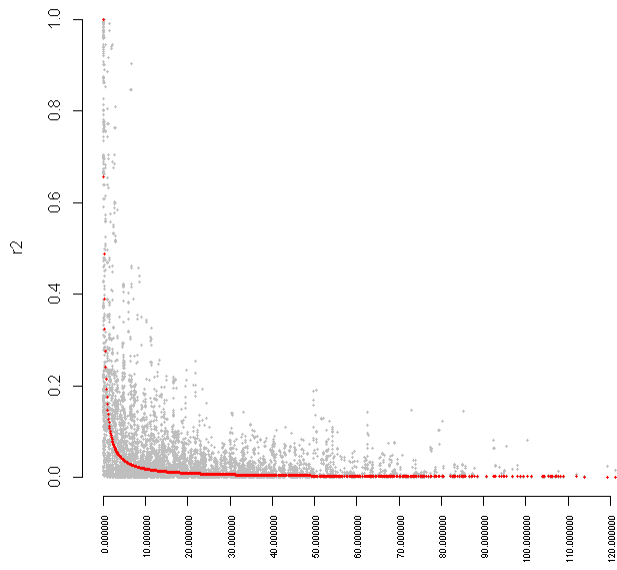

**C9 Winter 00 collection**

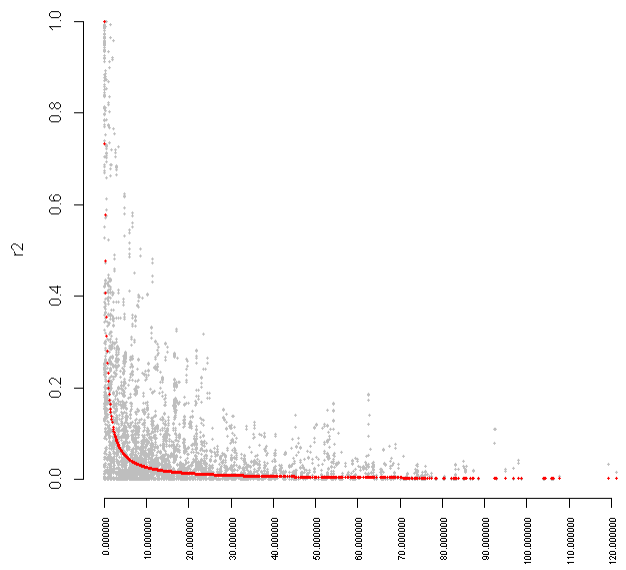

Supplement: 1471-2164-14-120-S8.pdf [file 1471-2164-14-120-S8.pdf]
