# Supplementary material for: High-density SNP-based genetic map development and linkage disequilibrium assessment in Brassica napus L
Source: PubMed Central journal article supplement (PMC3600037; doi:10.1186/1471-2164-14-120), 2013-02-22

**Supplementary figure 5:** Linkage disequilibrium heatmaps for each linkage group in the whole, spring (SOSR), winter (WOSR) and « 00 » WOSR collections. The putative position of the centromeres is indicated by a black arrow.

Whole collection

A1

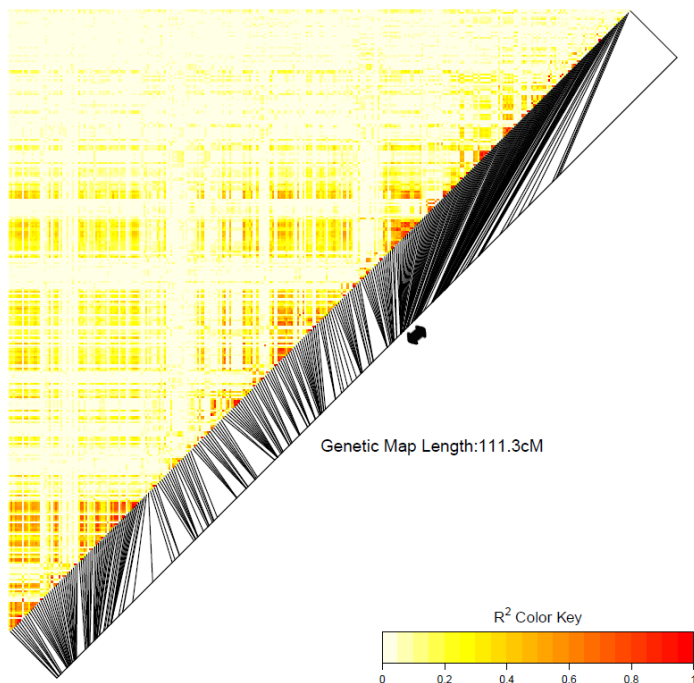

SOSR collection

A1

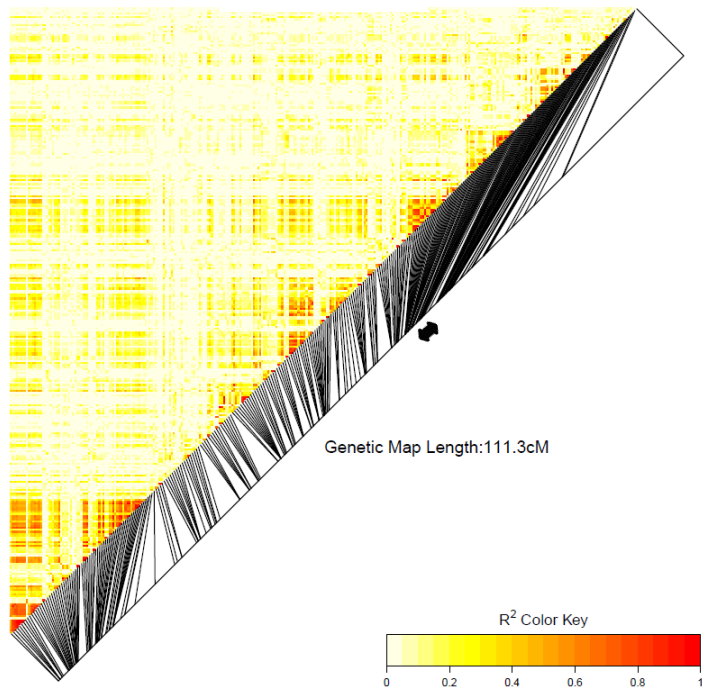

WOSR collection

A1

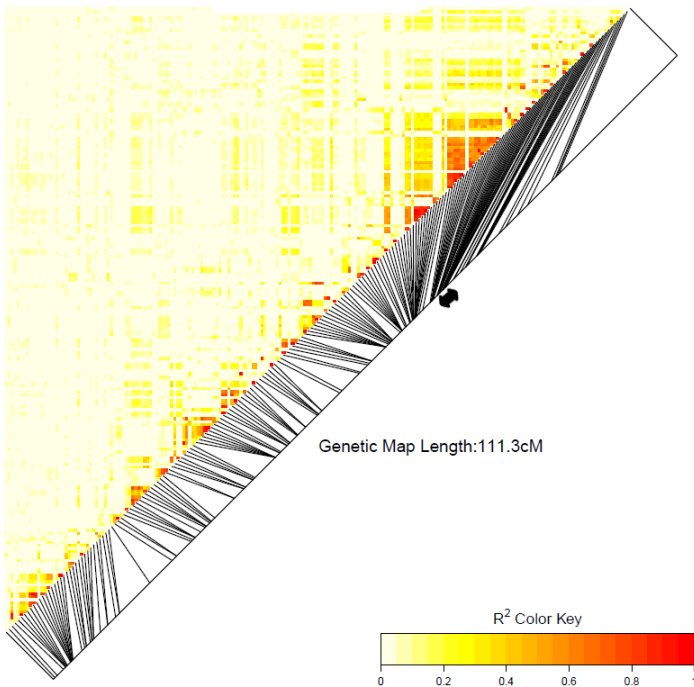

« 00 » WOSR collection

A1

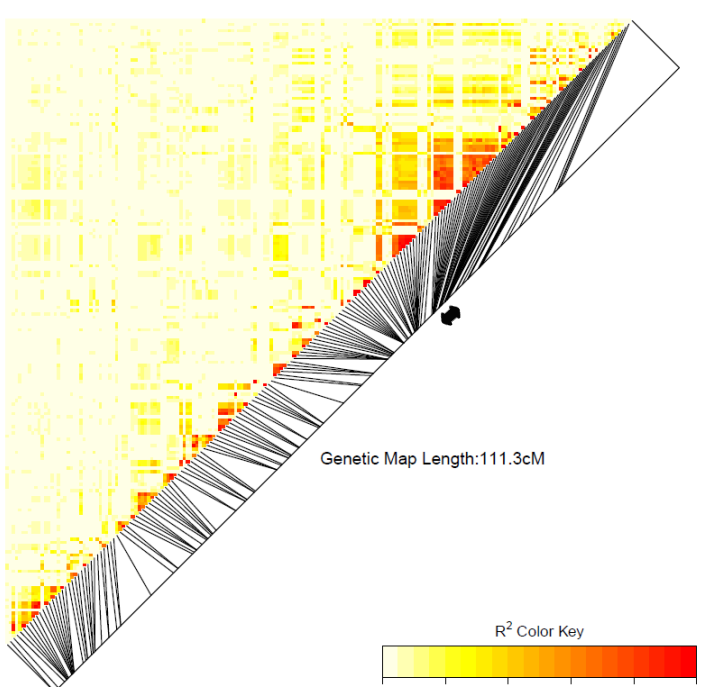

Whole collection

A2

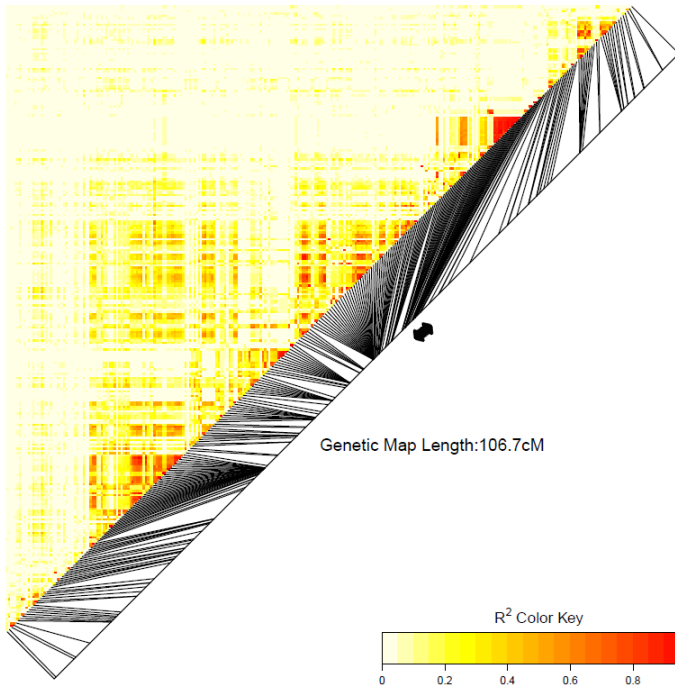

SOSR collection

A2

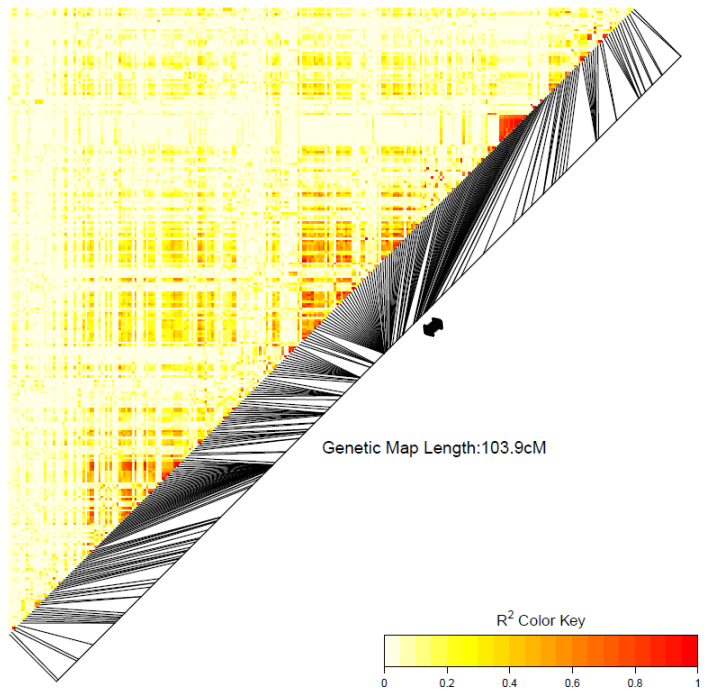

WOSR collection

A2

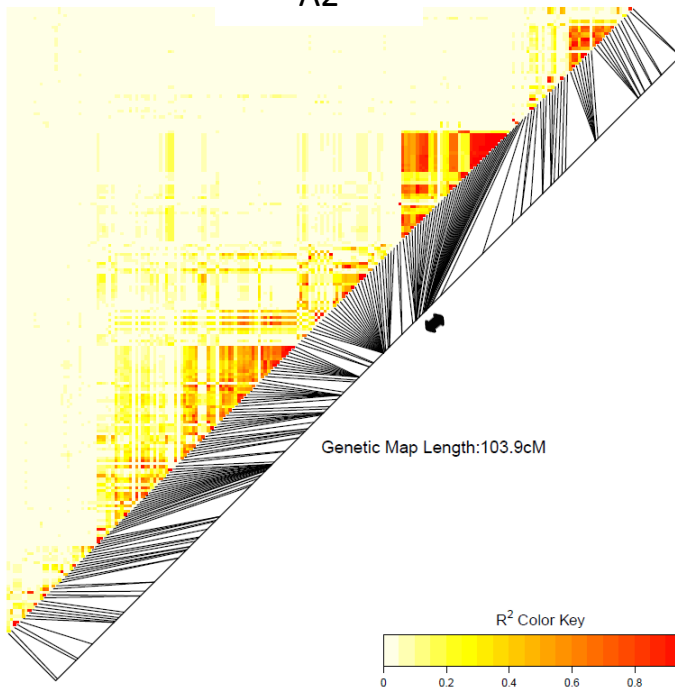

« 00 » WOSR collection

A2

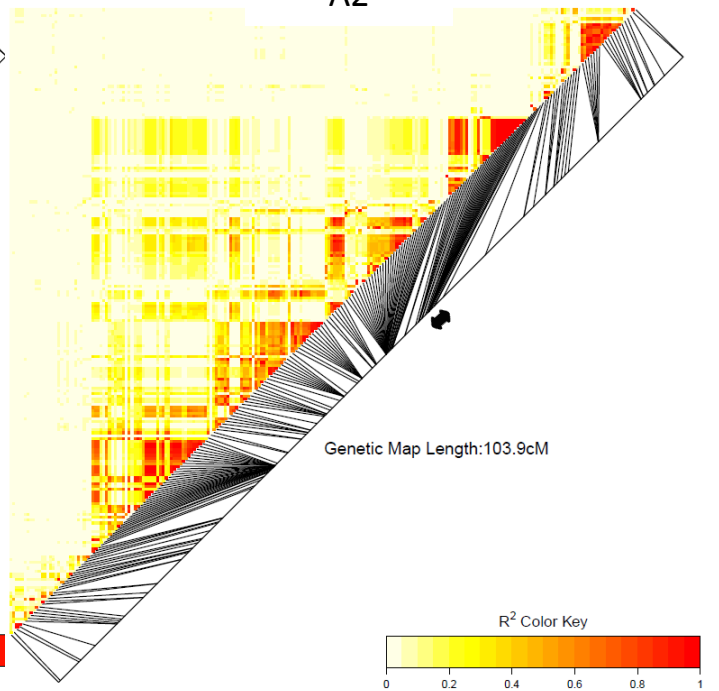

Whole collection

A3

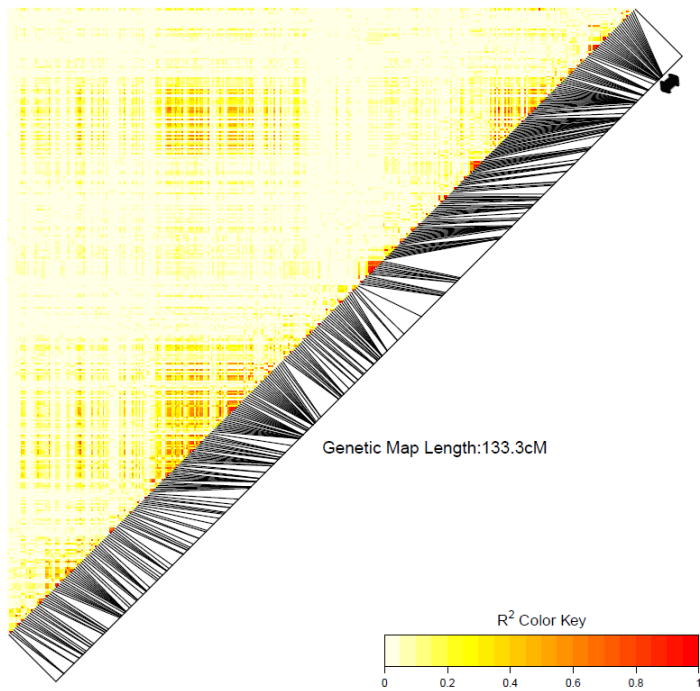

SOSR collection

A3

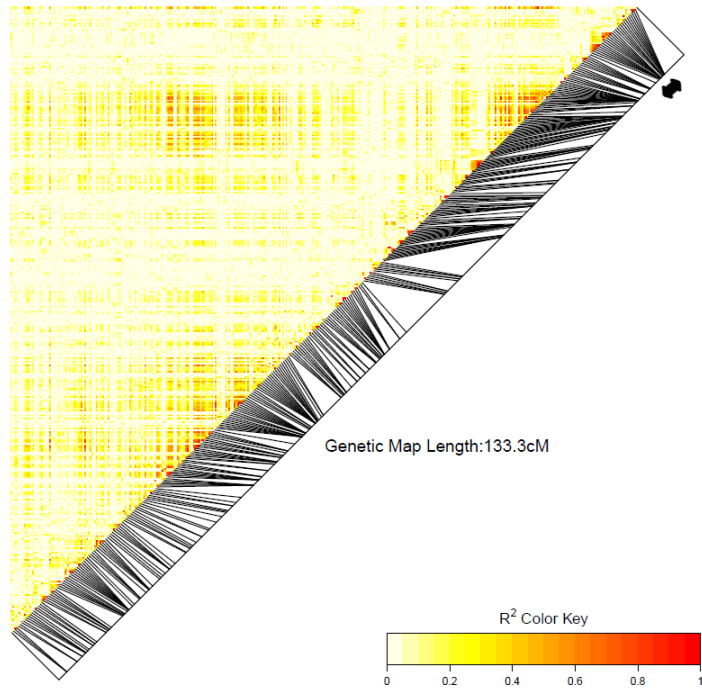

WOSR collection

A3

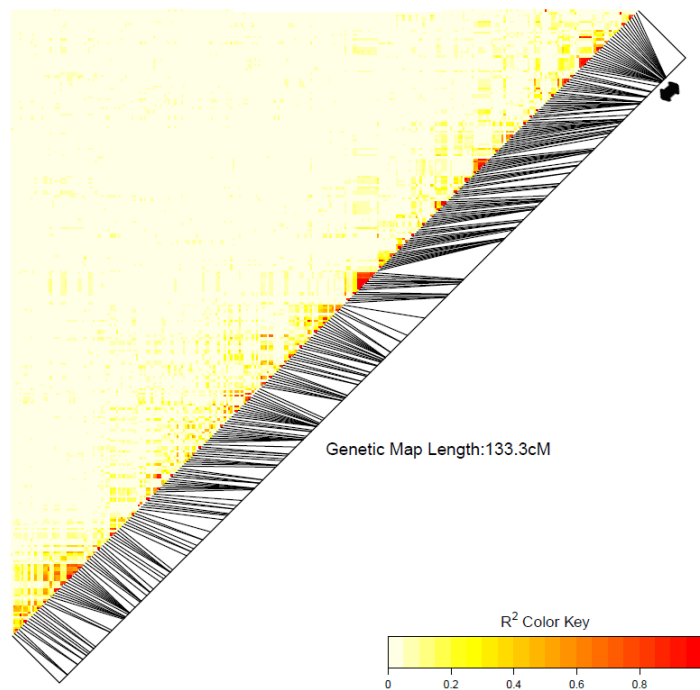

« 00 » WOSR collection

A3

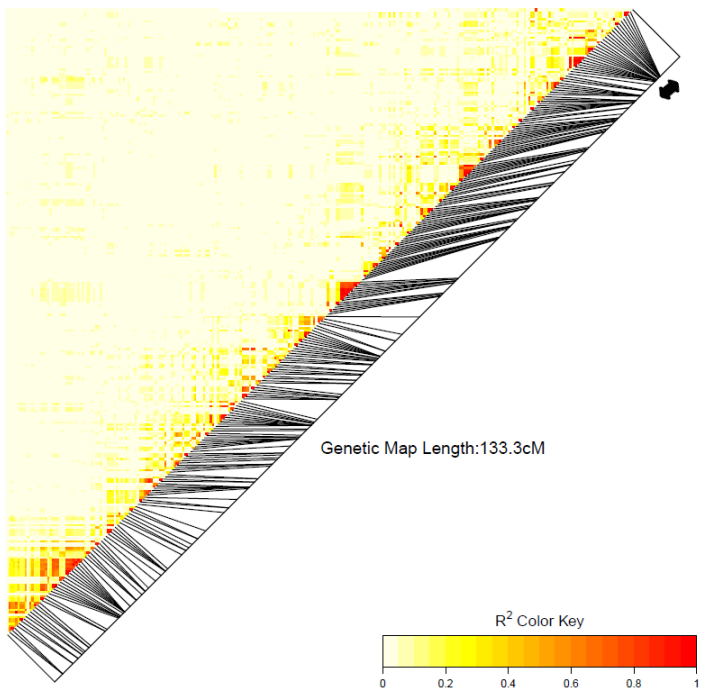

Whole collection

A4

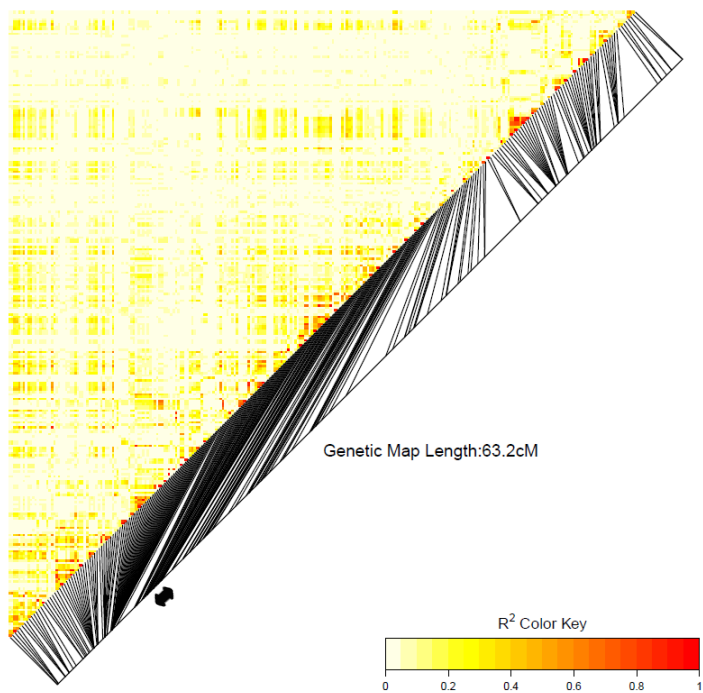

SOSR collection

A4

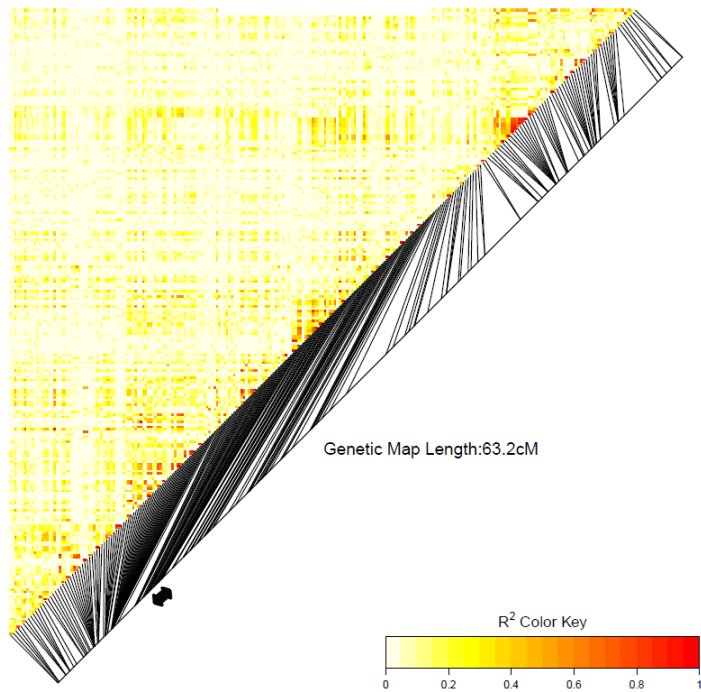

WOSR collection

A4

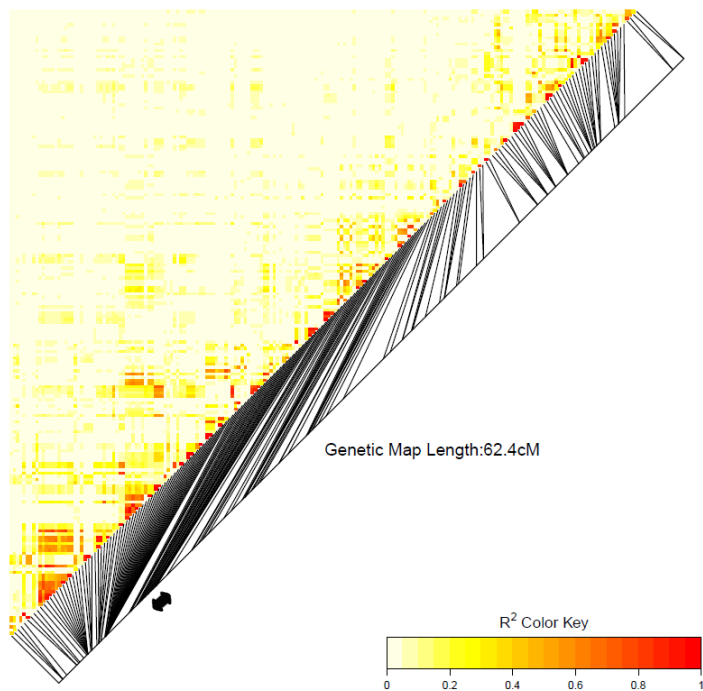

« 00 » WOSR collection

A4

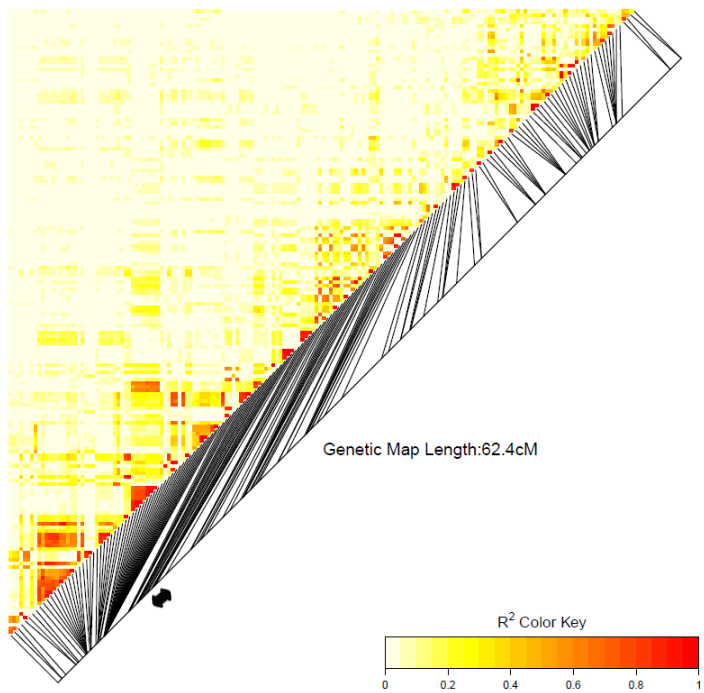

Whole collection

A5

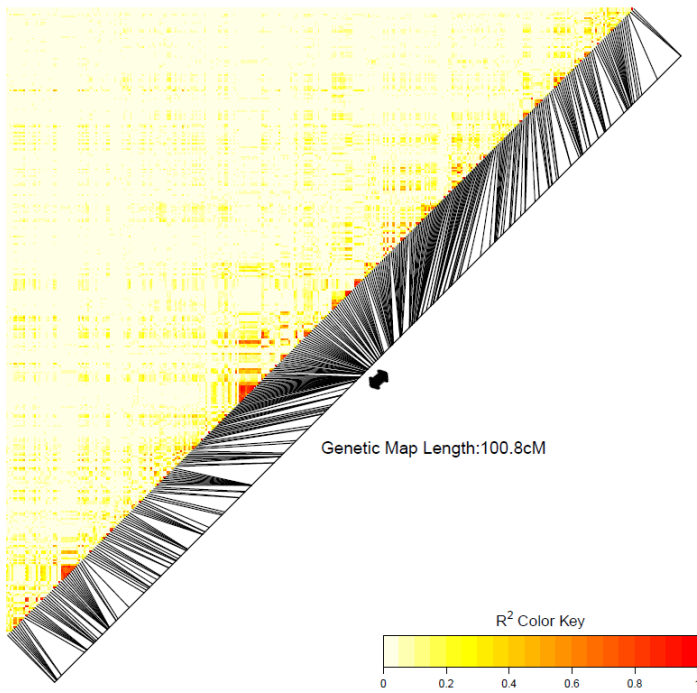

SOSR collection

A5

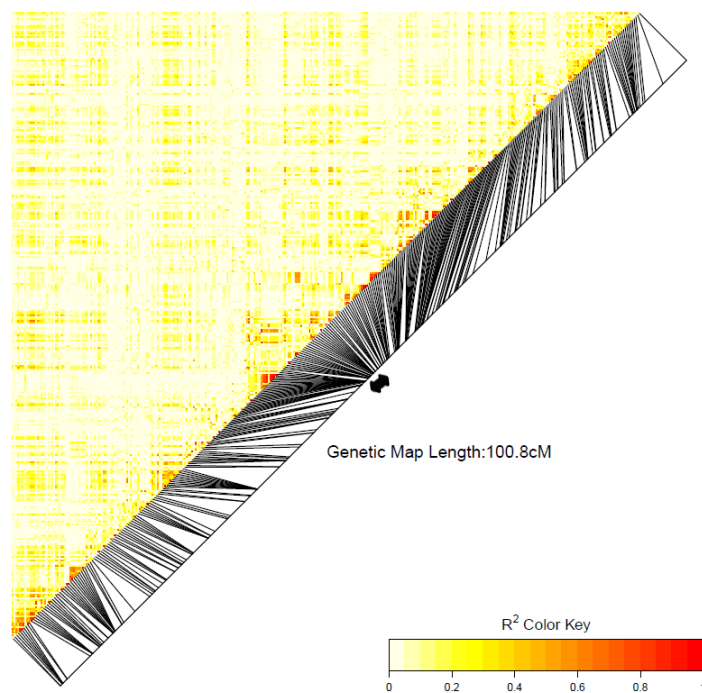

WOSR collection

A5

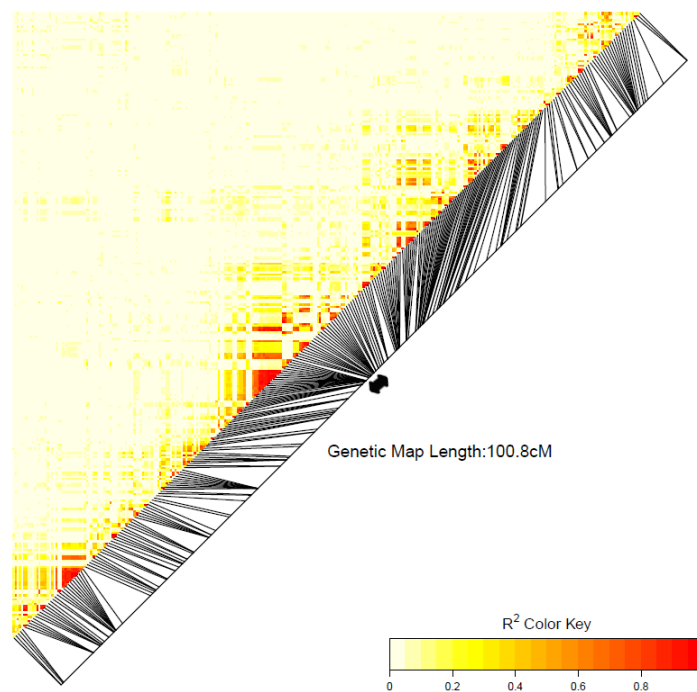

« 00 » WOSR collection

A5

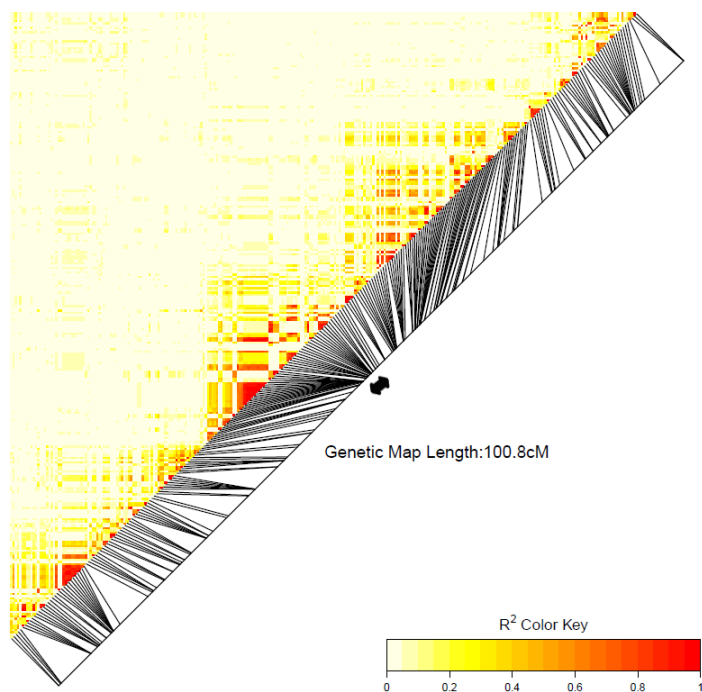

Whole collection

A6

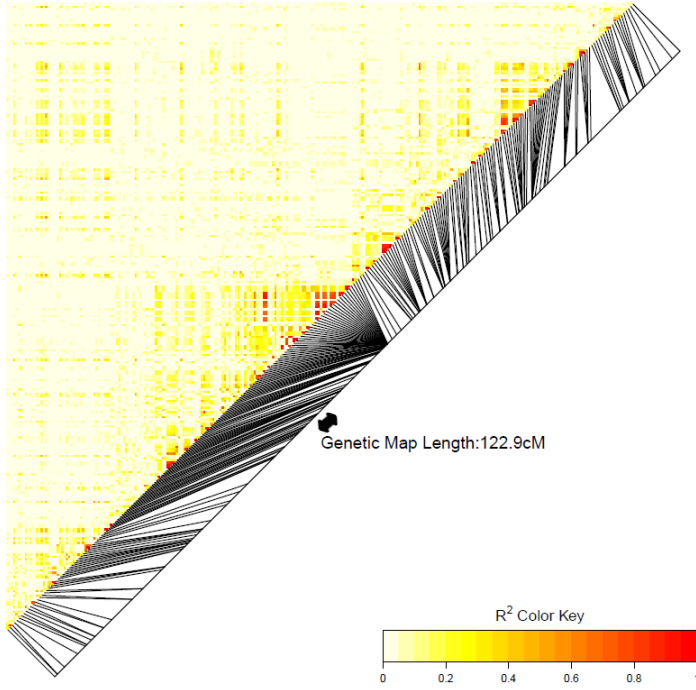

SOSR collection

A6

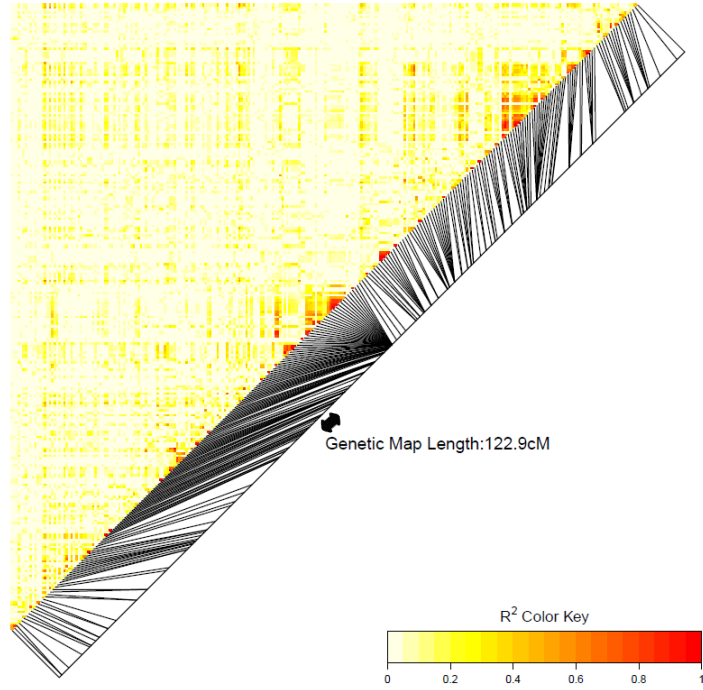

WOSR collection

A6

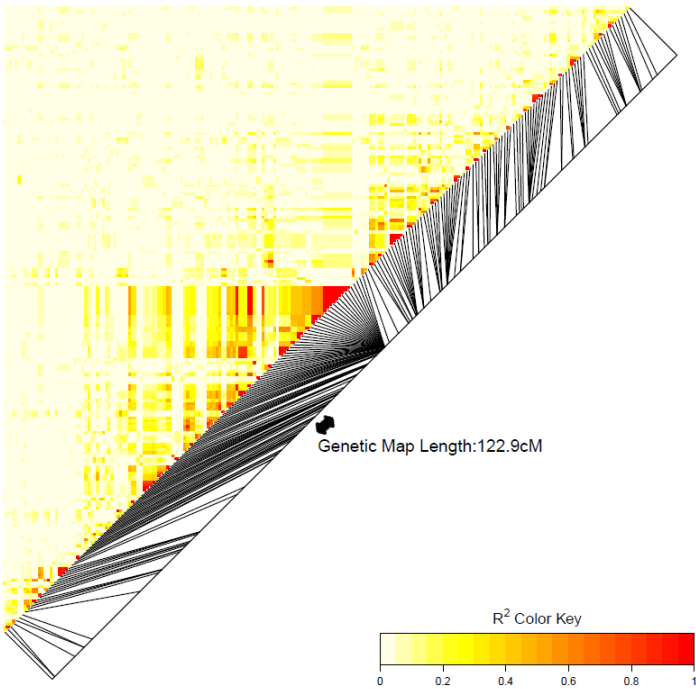

« 00 » WOSR collection

A6

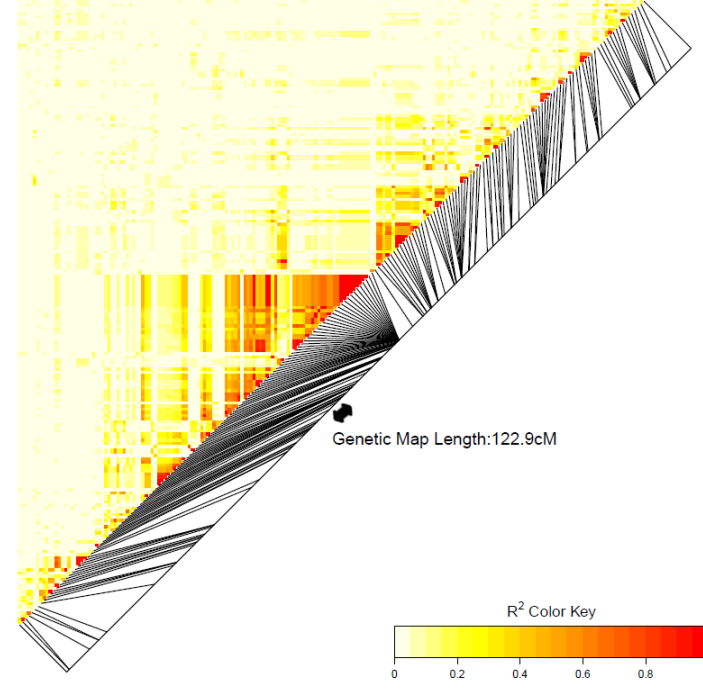

Whole collection

A7

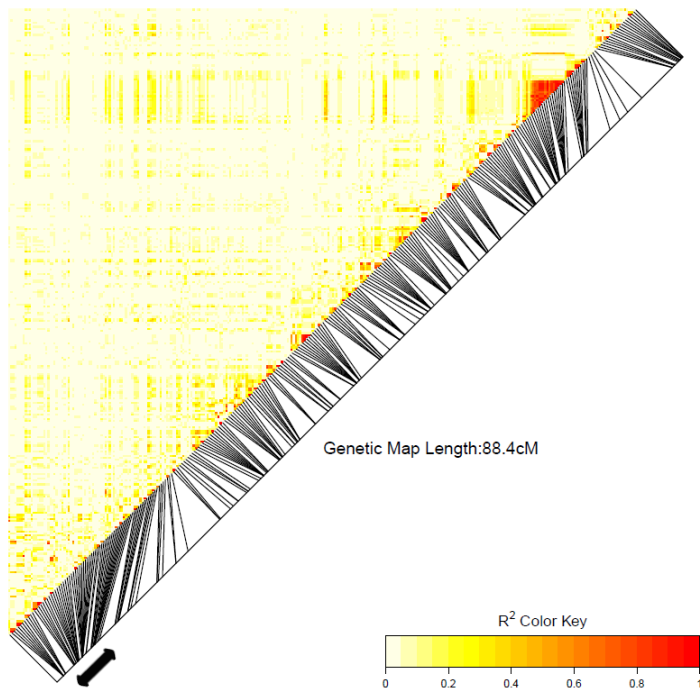

SOSR collection

A7

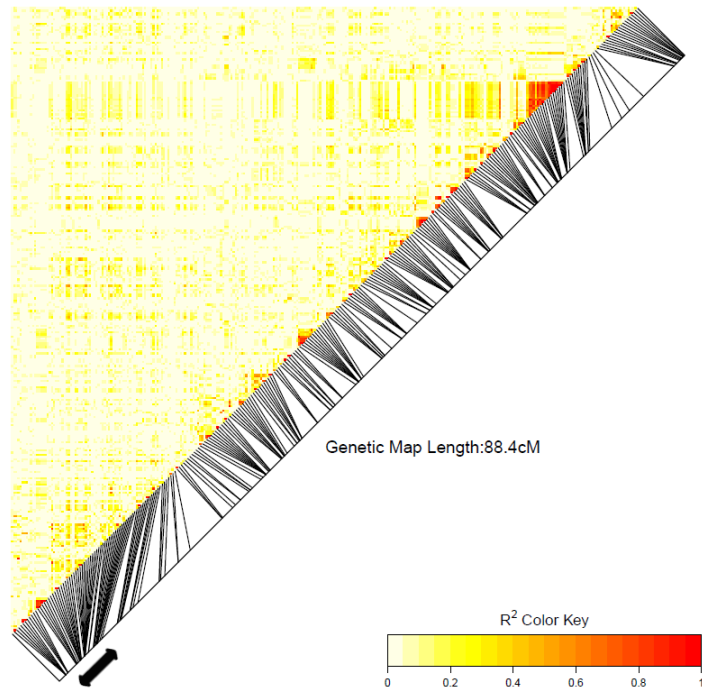

WOSR collection

A7

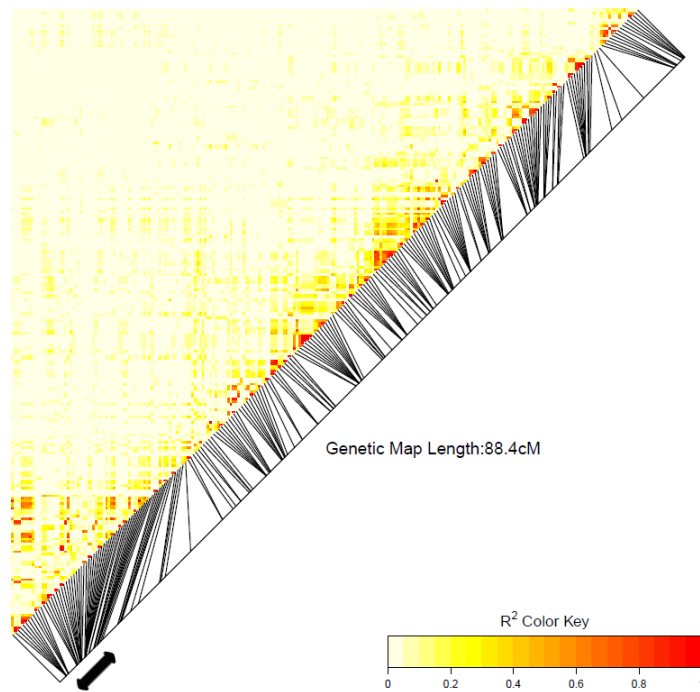

« 00 » WOSR collection

A7

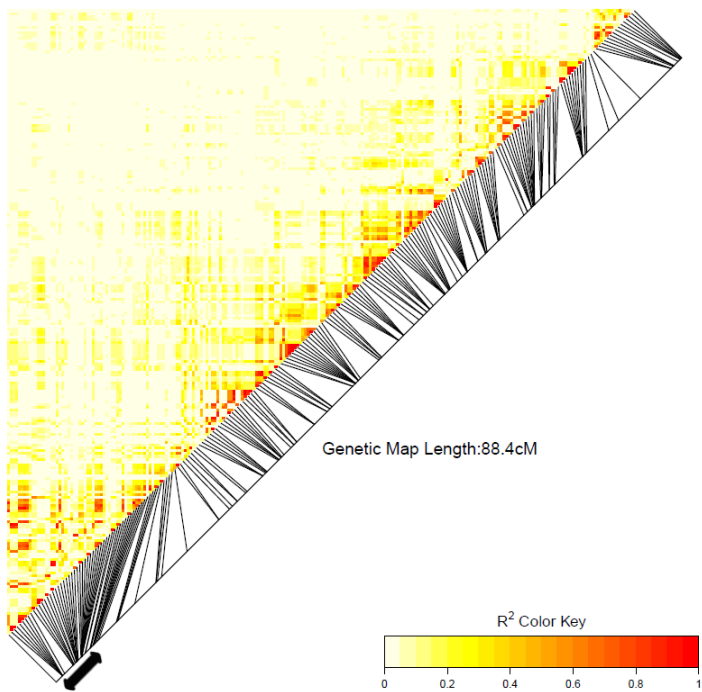

Whole collection

A8

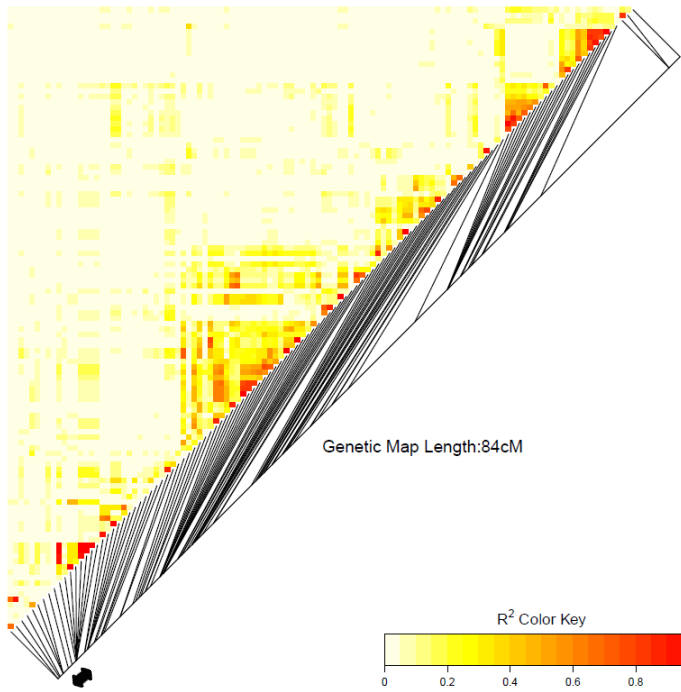

SOSR collection

A8

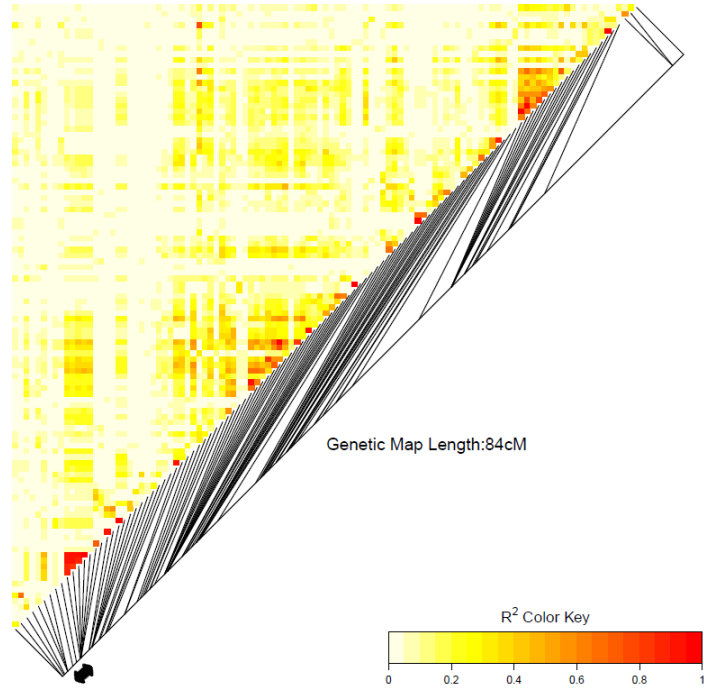

WOSR collection

A8

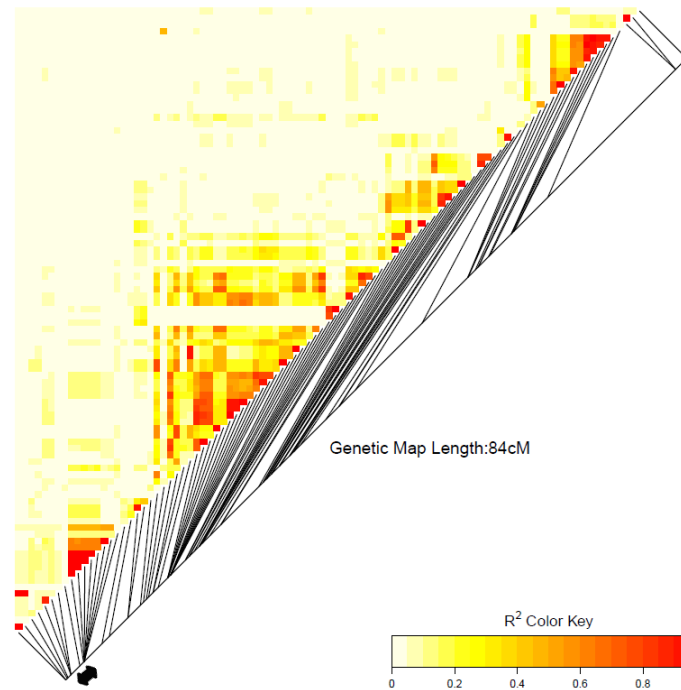

« 00 » WOSR collection

A8

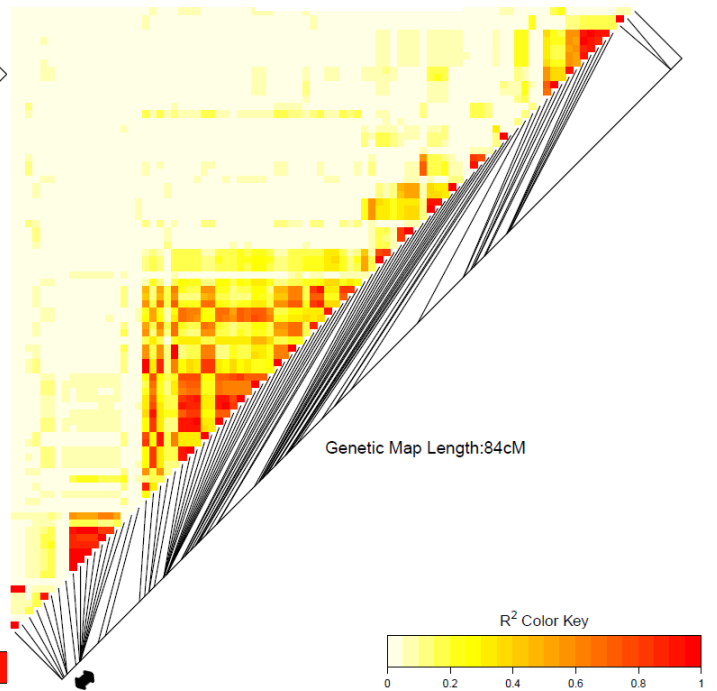



Whole collection

A9

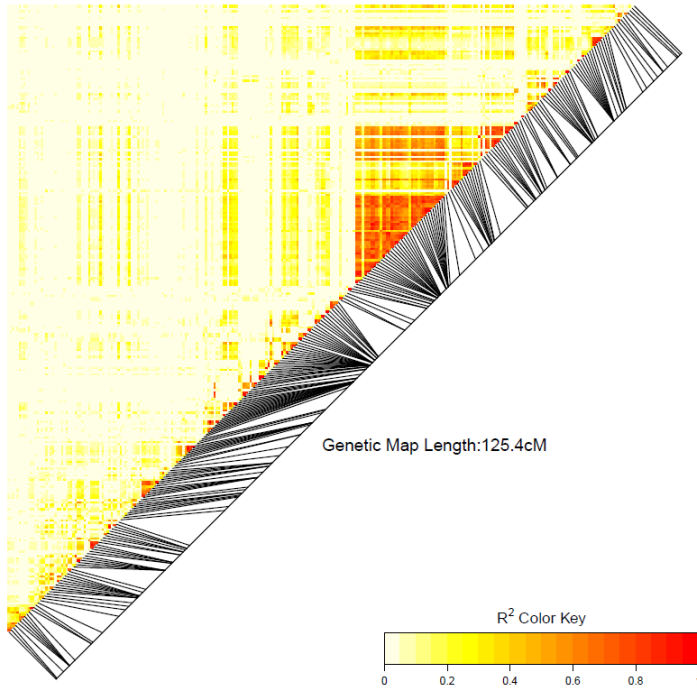

SOSR collection

A9

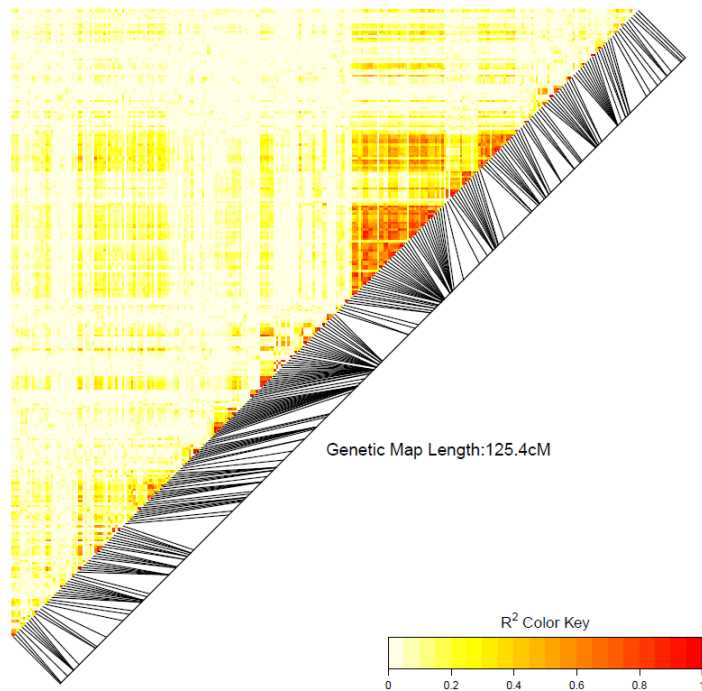

WOSR collection

A9

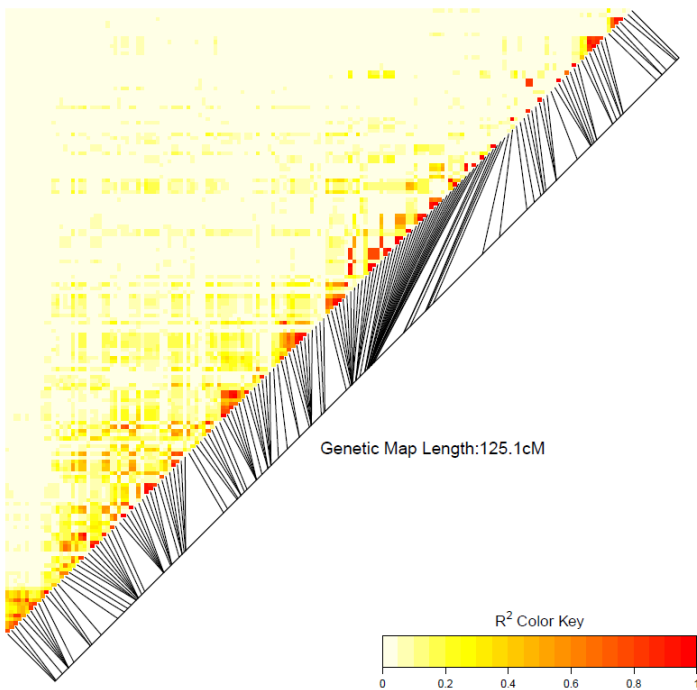

« 00 » WOSR collection

A9

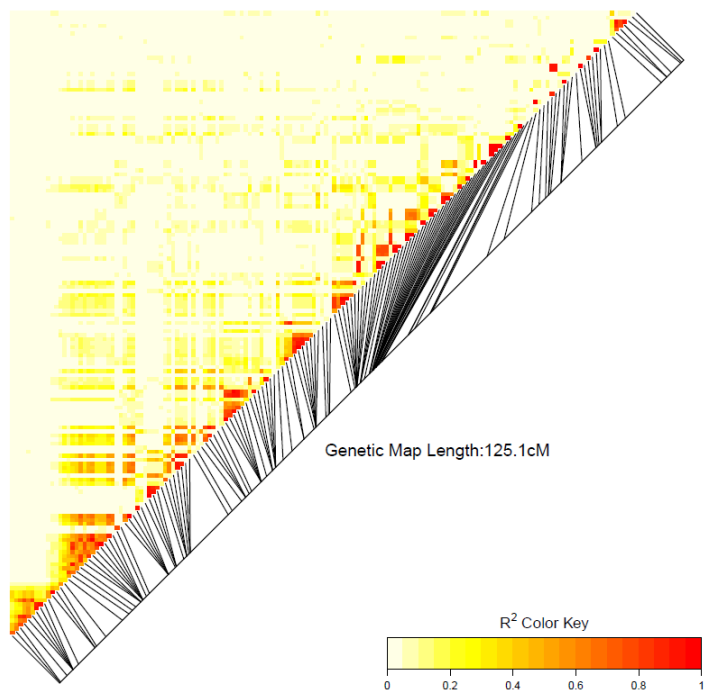

Whole collection

A10

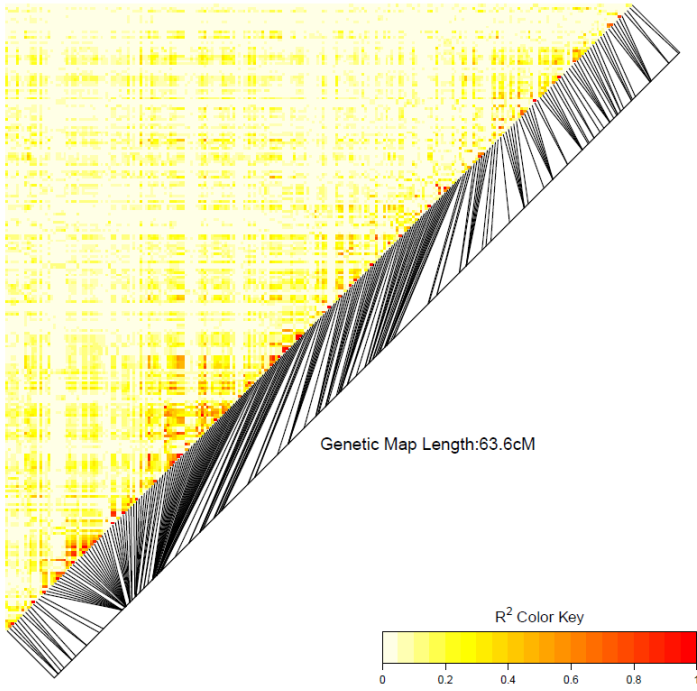

SOSR collection

A10

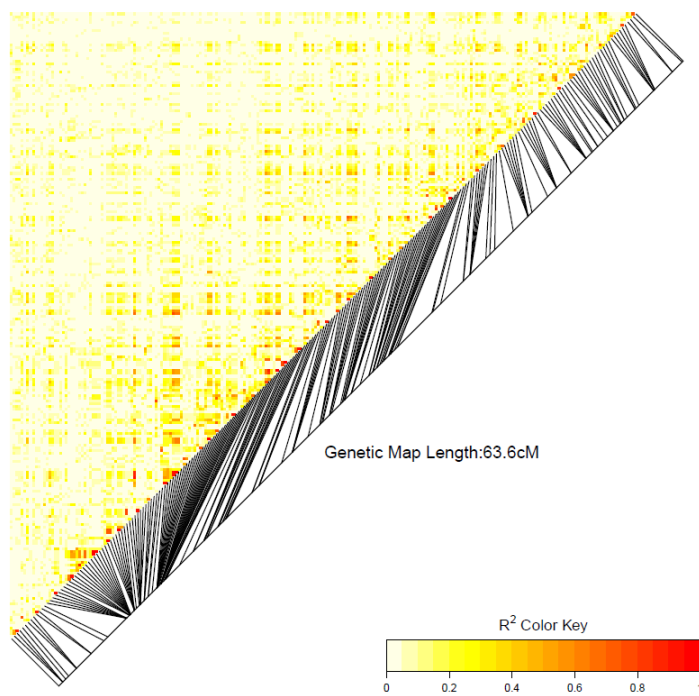

WOSR collection

A10

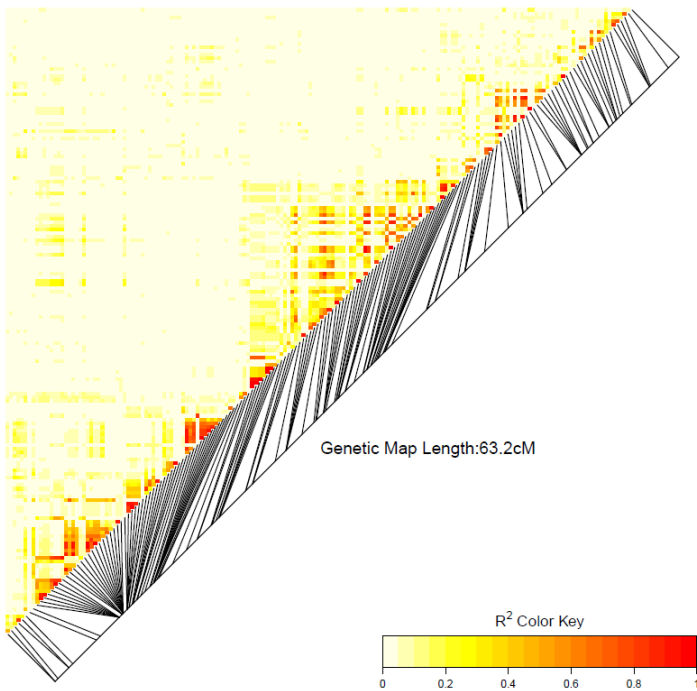

« 00 » WOSR collection

A10

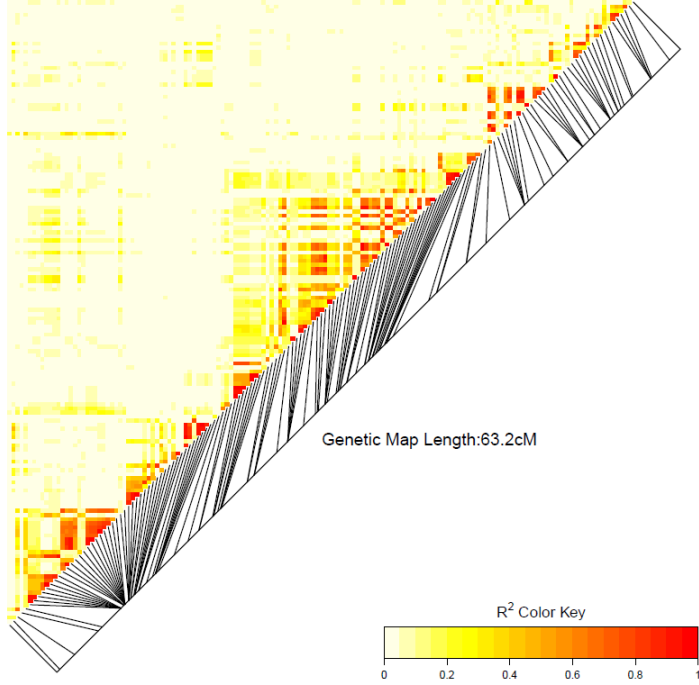

Whole collection

C1

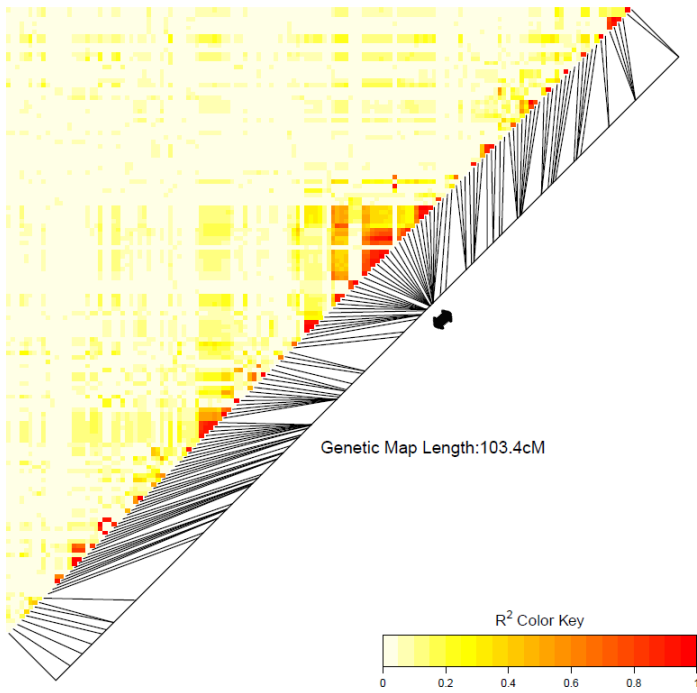

SOSR collection

C1

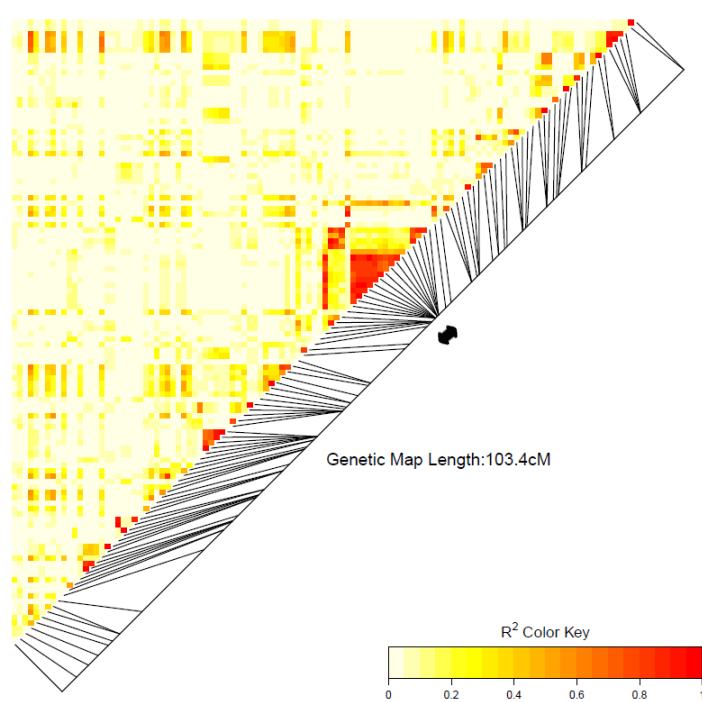

WOSR collection

C1

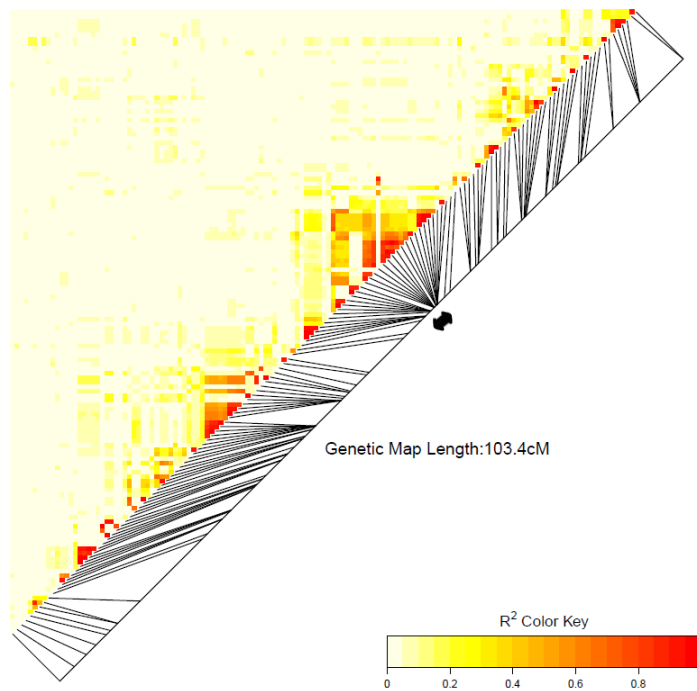

« 00 » WOSR collection

C1

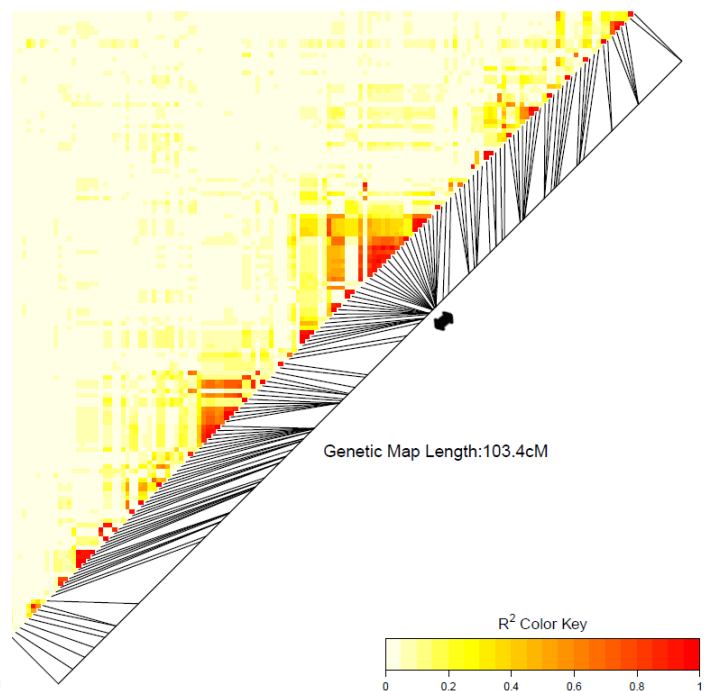

Whole collection

C2

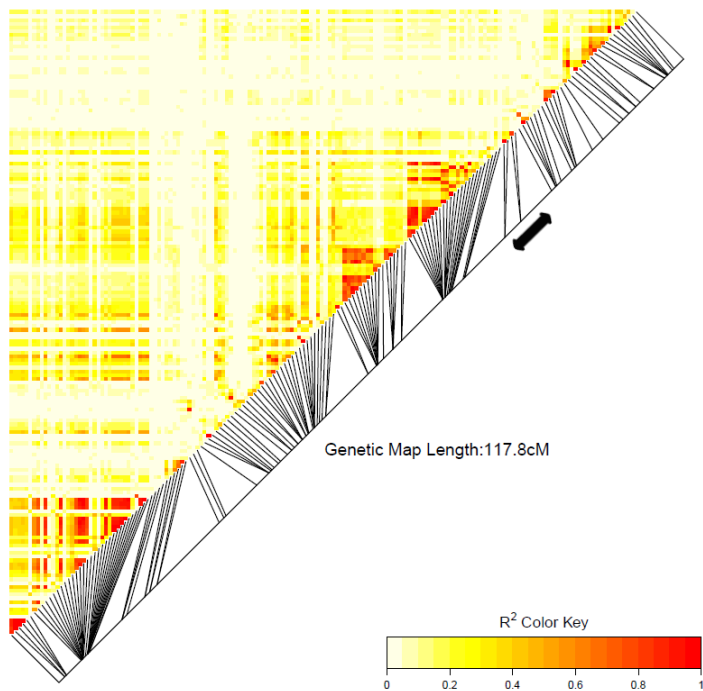

SOSR collection

C2

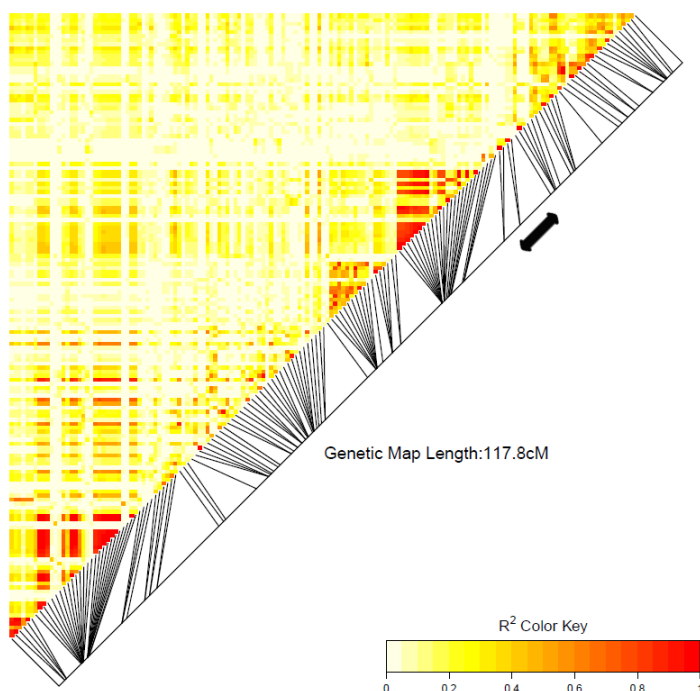

WOSR collection

C2

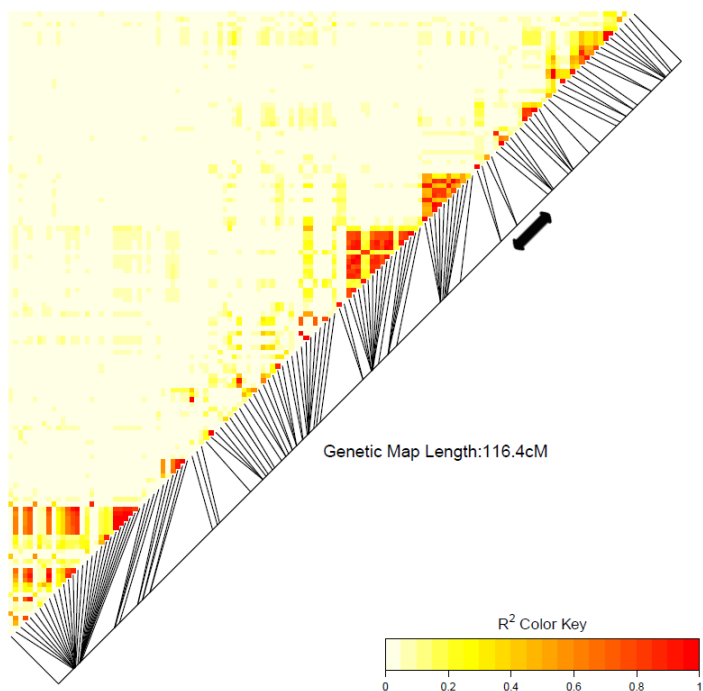

« 00 » WOSR collection

C2

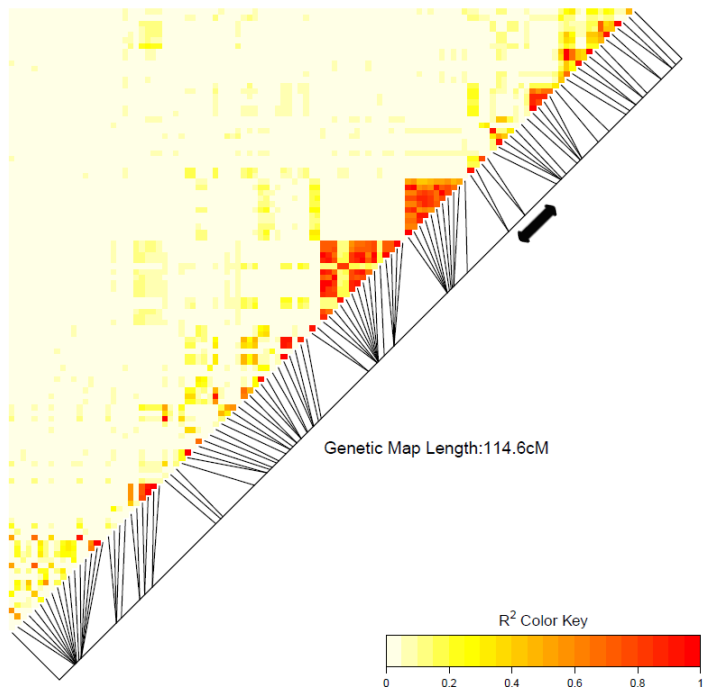

Whole collection

C3

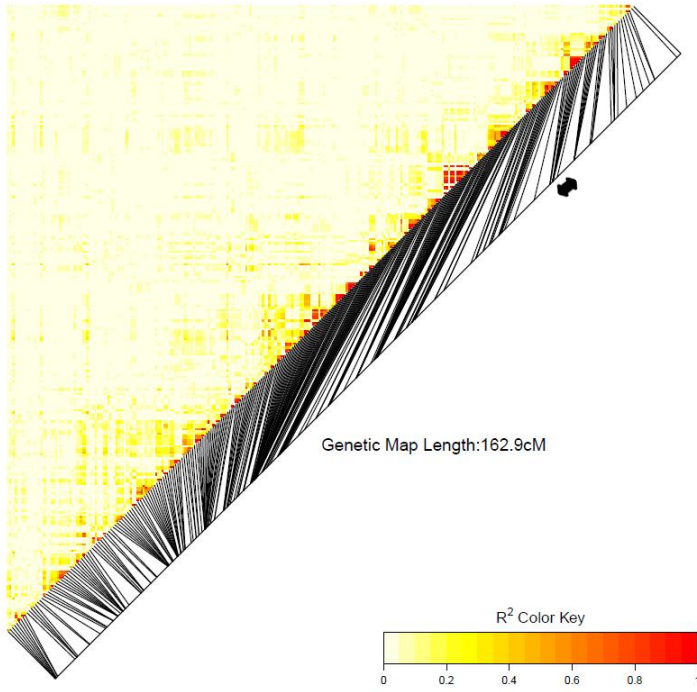

SOSR collection

C3

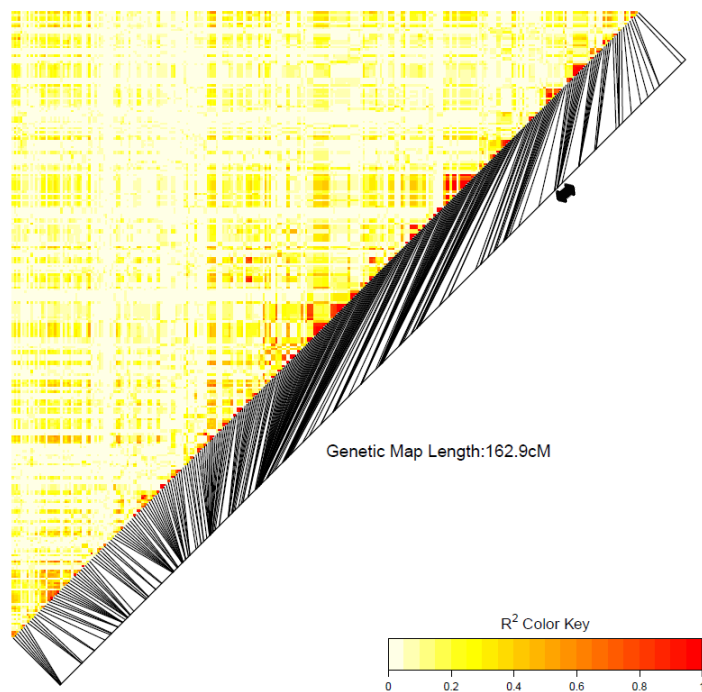

WOSR collection

C3

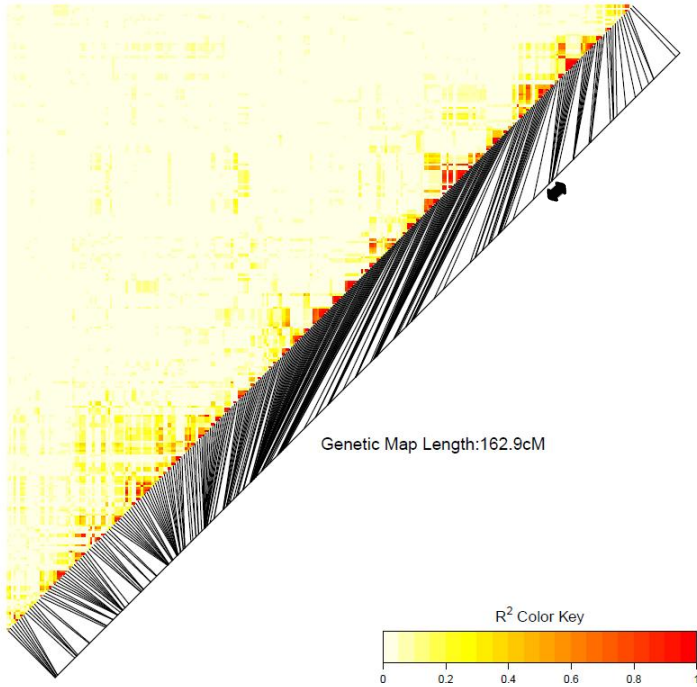

« 00 » WOSR collection

C3

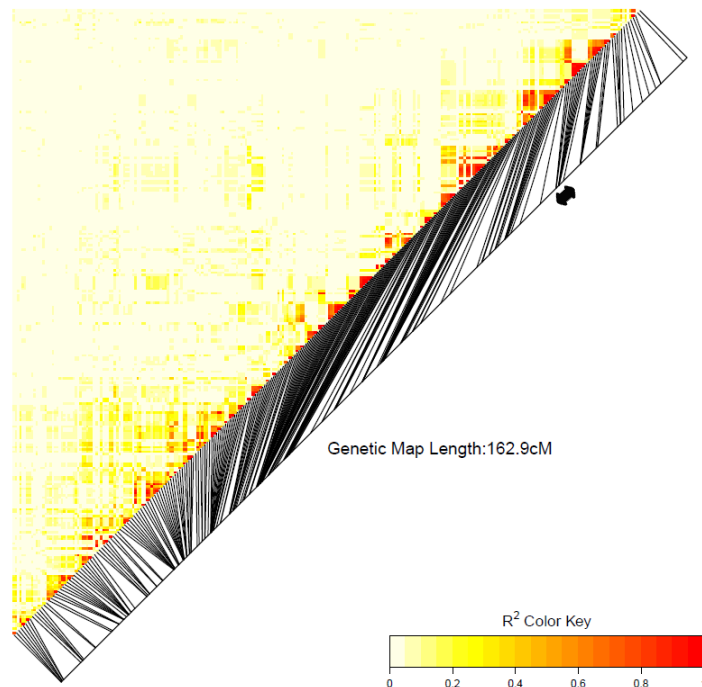

Whole collection

C4

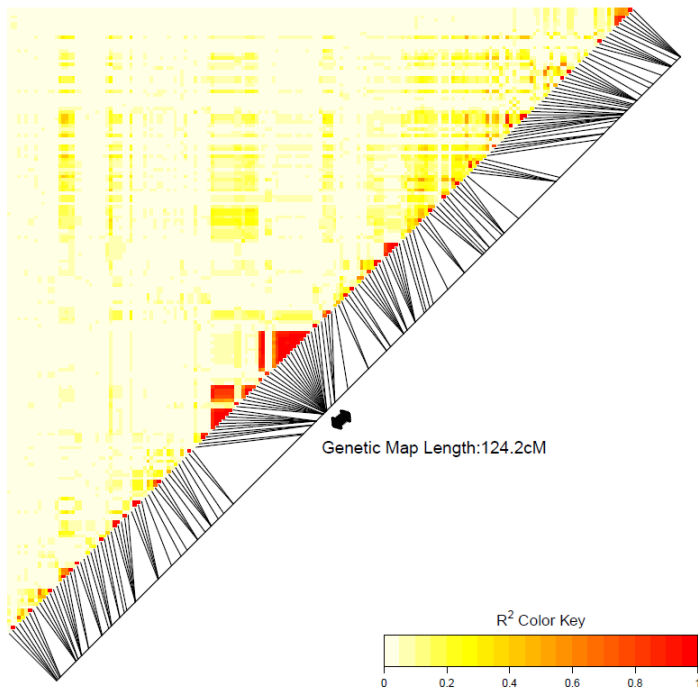

SOSR collection

C4

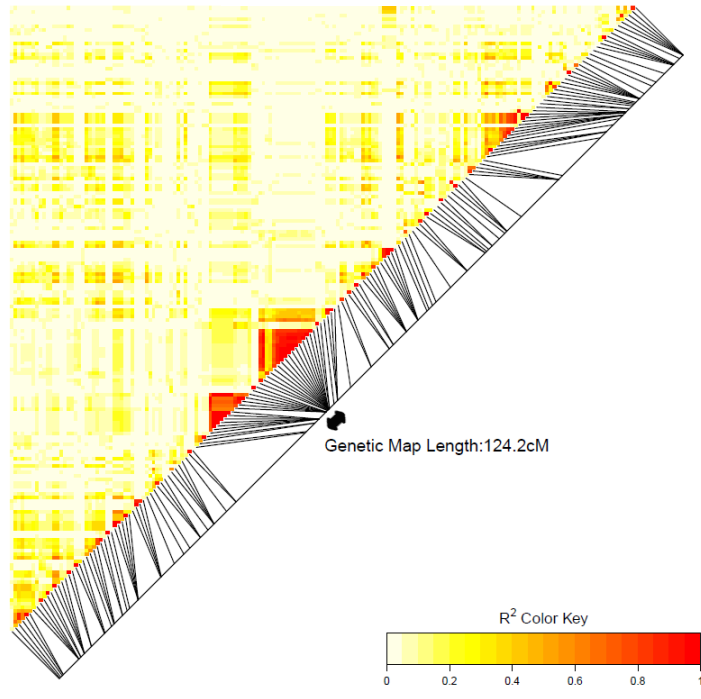

WOSR collection

C4

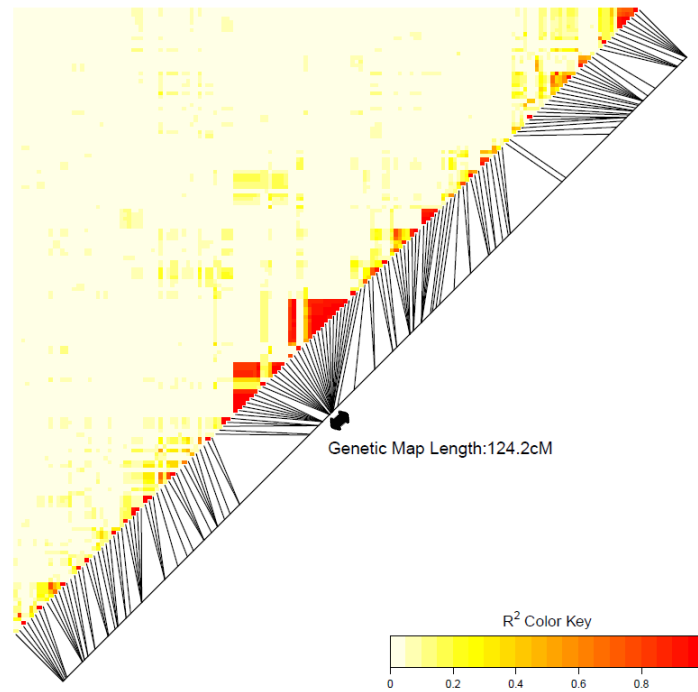

« 00 » WOSR collection

C4

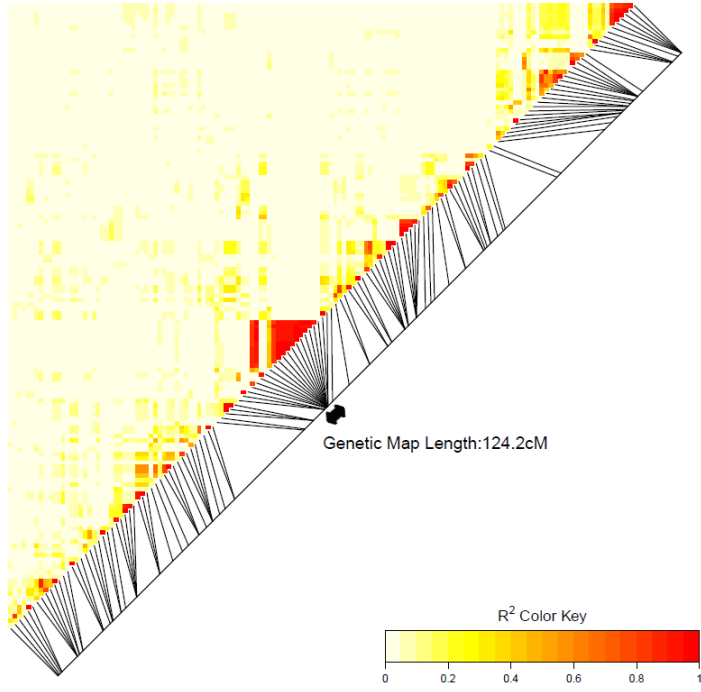

Whole collection

C5

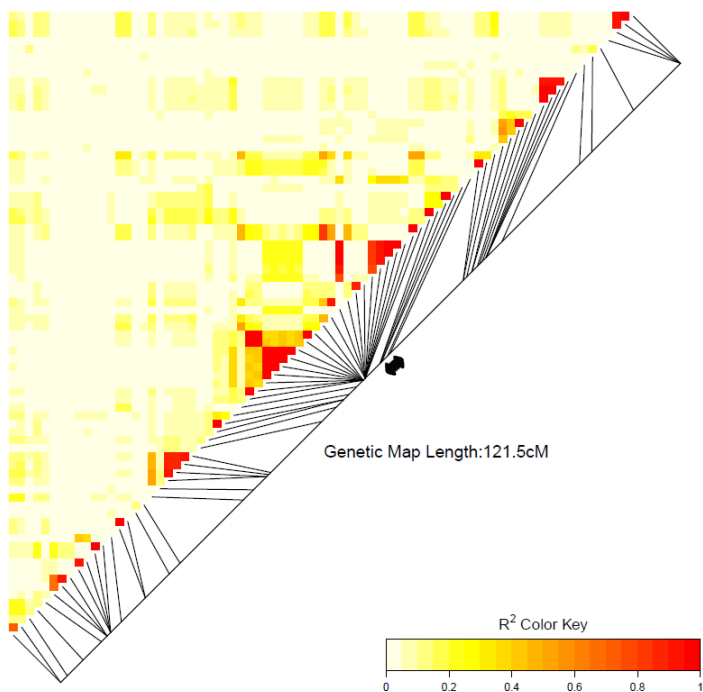

SOSR collection

C5

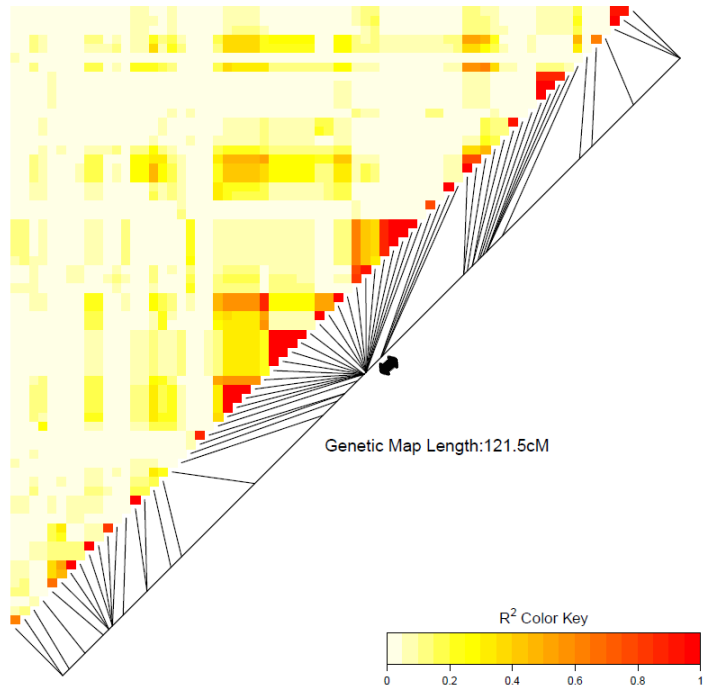

WOSR collection

C5

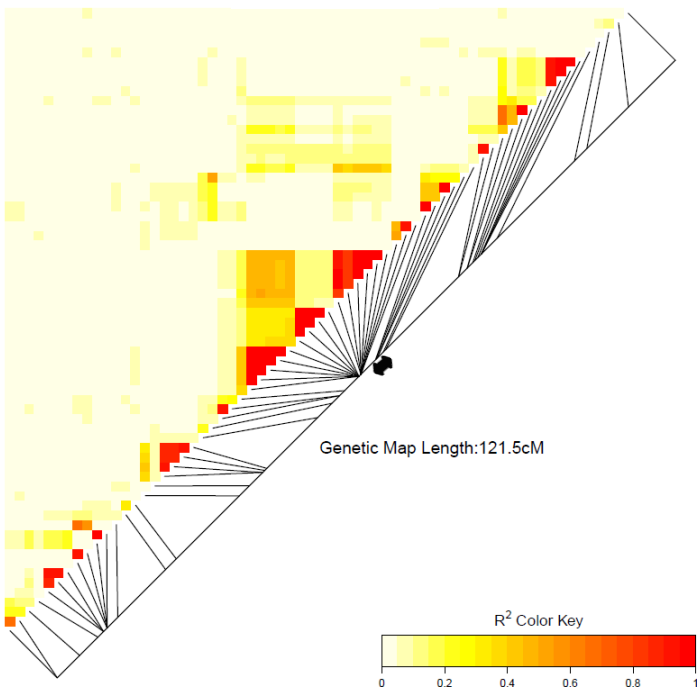

« 00 » WOSR collection

C5

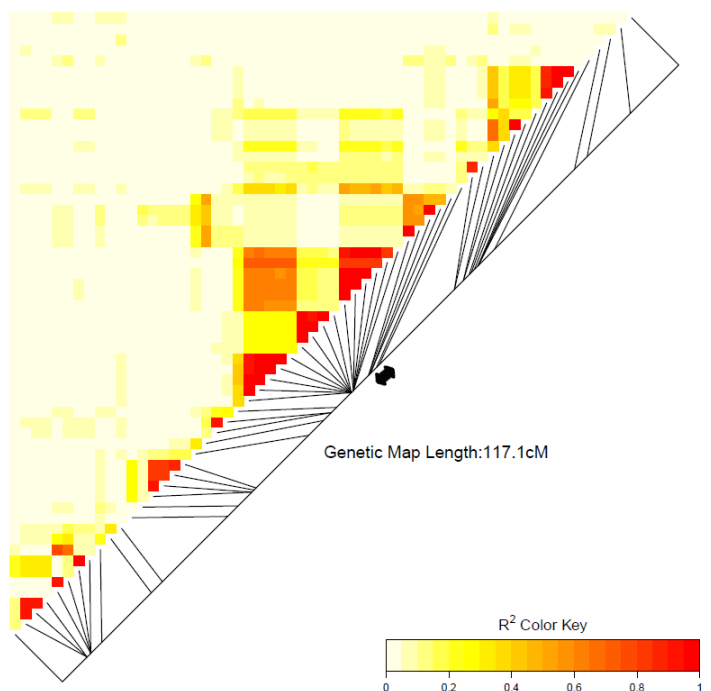

Whole collection

C6

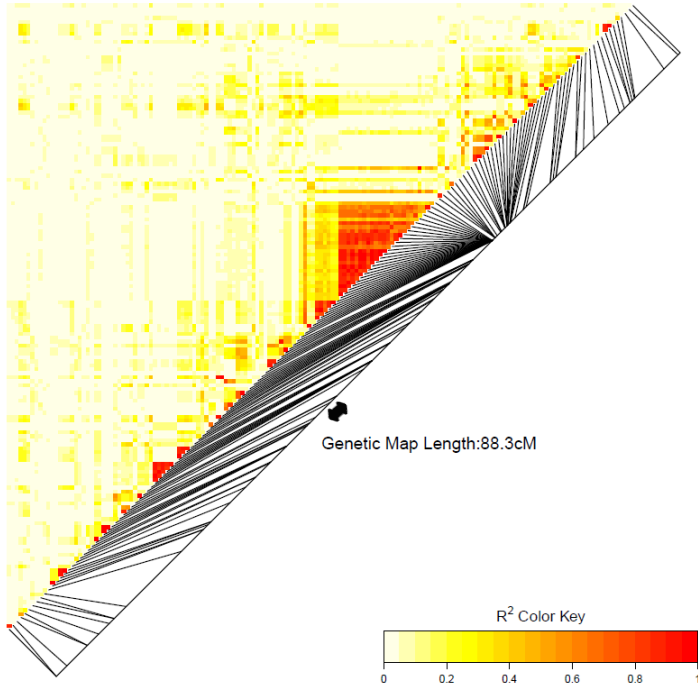

SOSR collection

C6

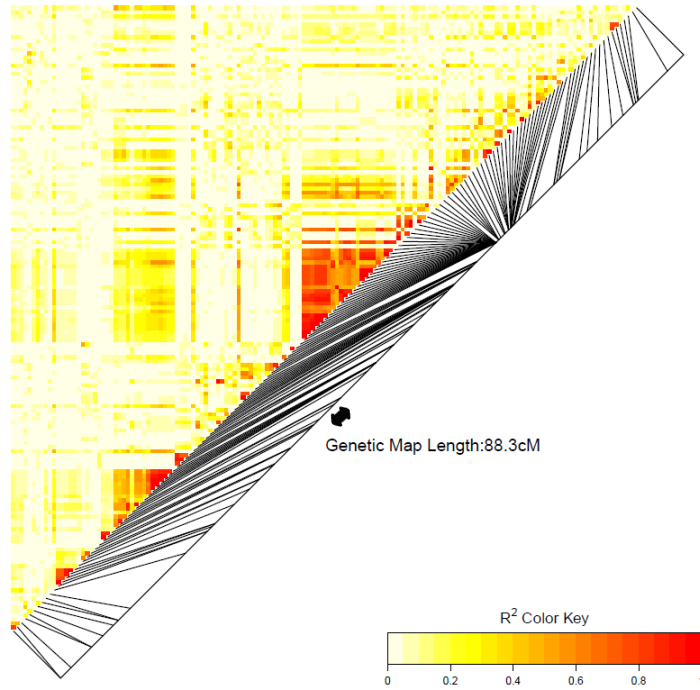

WOSR collection

C6

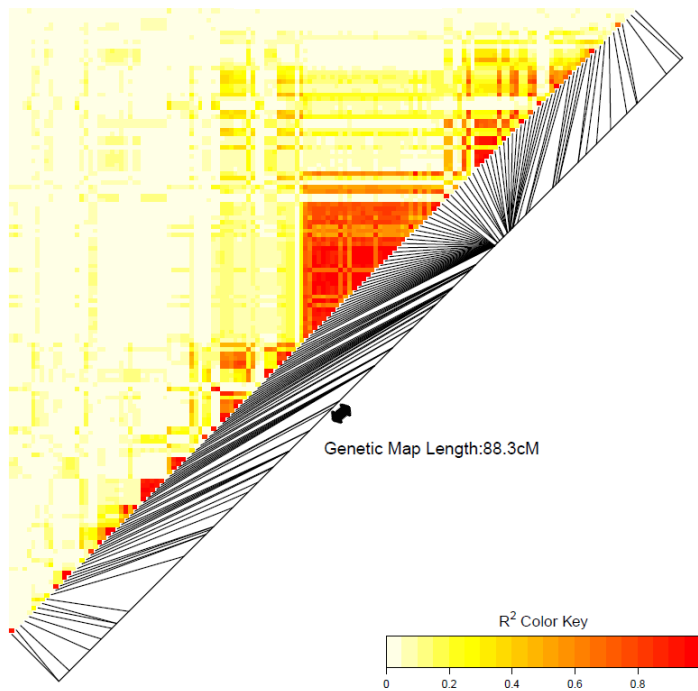

« 00 » WOSR collection

C6

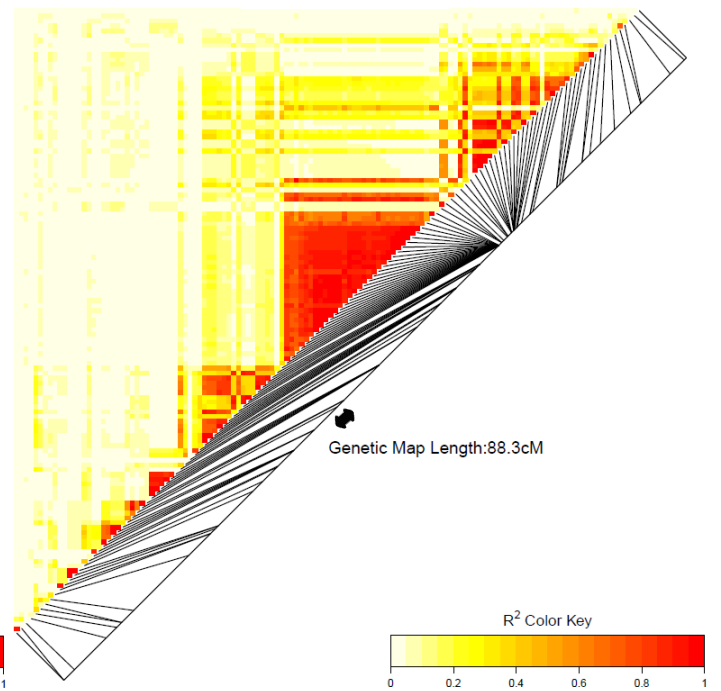



Whole collection

C7

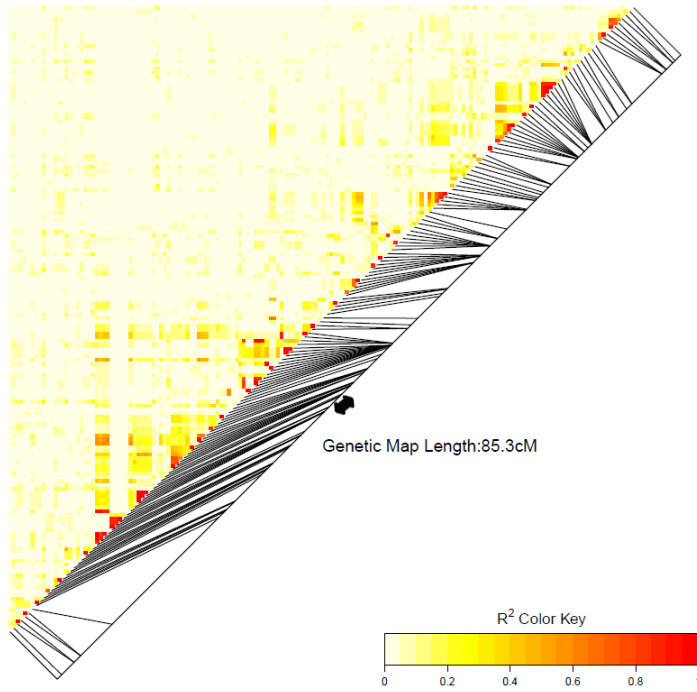

SOSR collection

C7

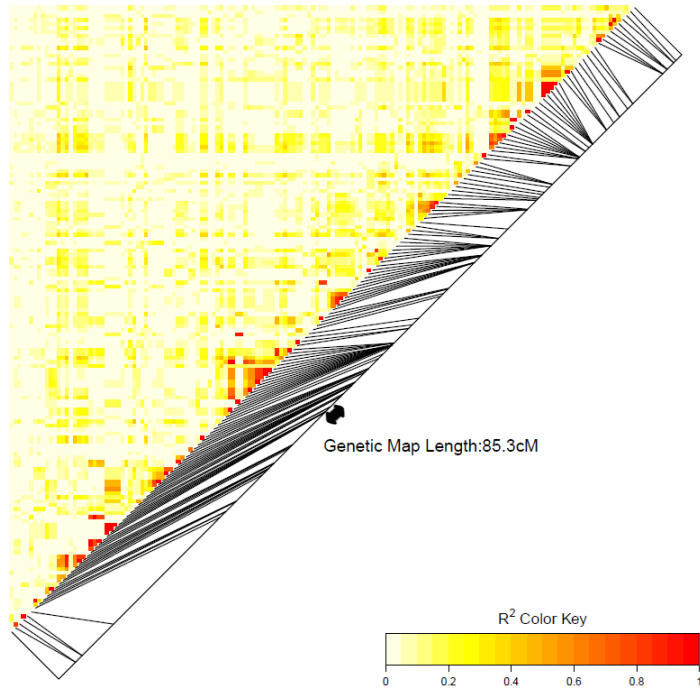

WOSR collection

C7

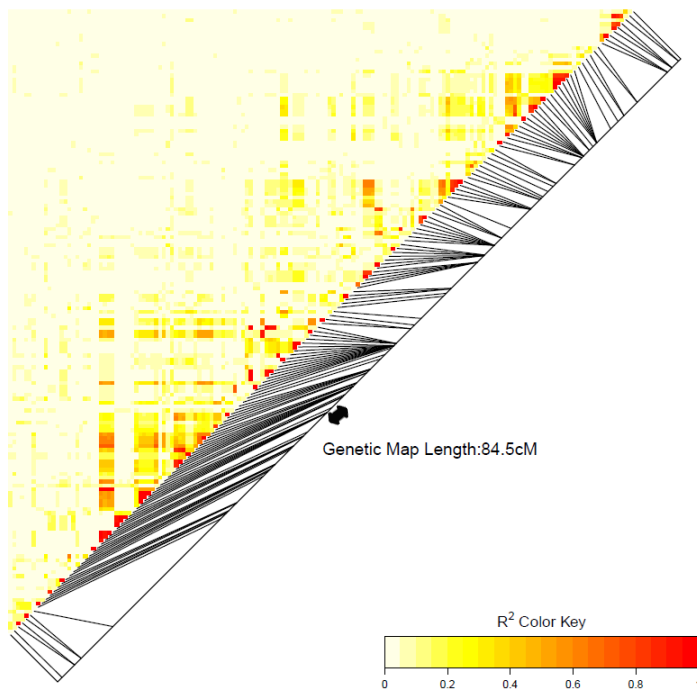

« 00 » WOSR collection

C7

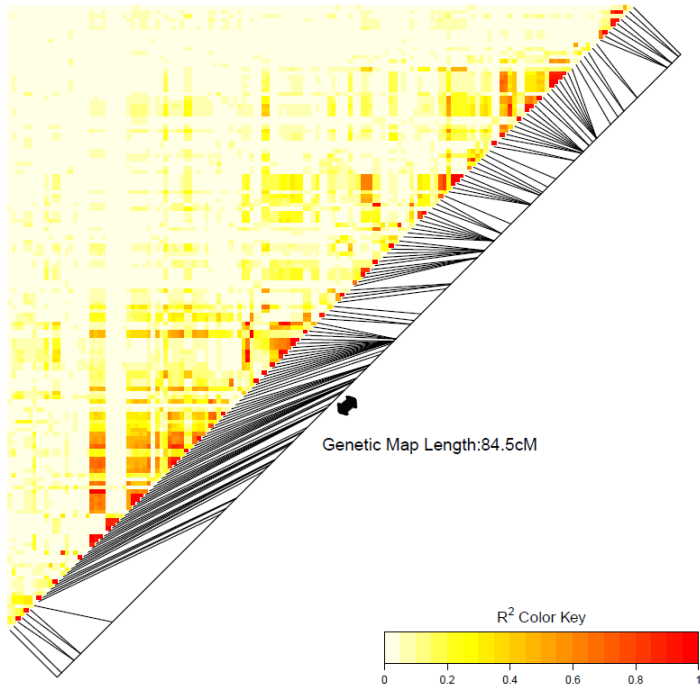

Whole collection

C8

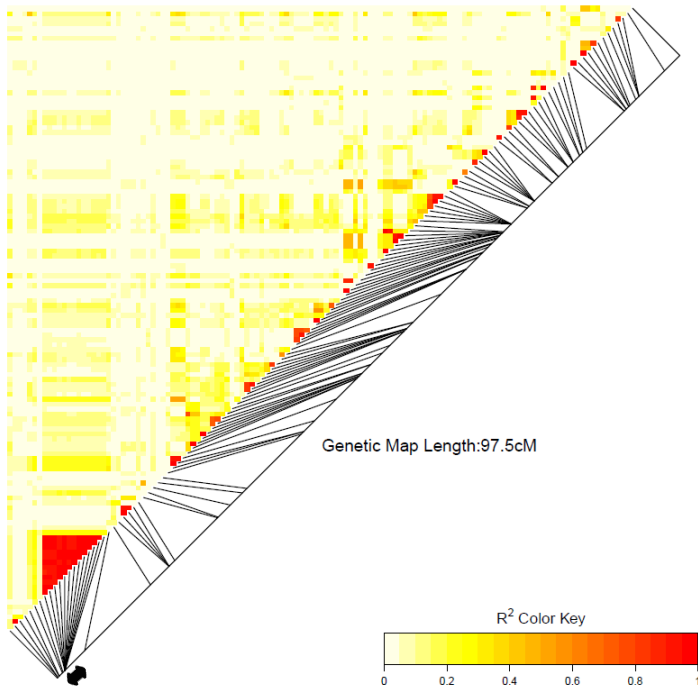

SOSR collection

C8

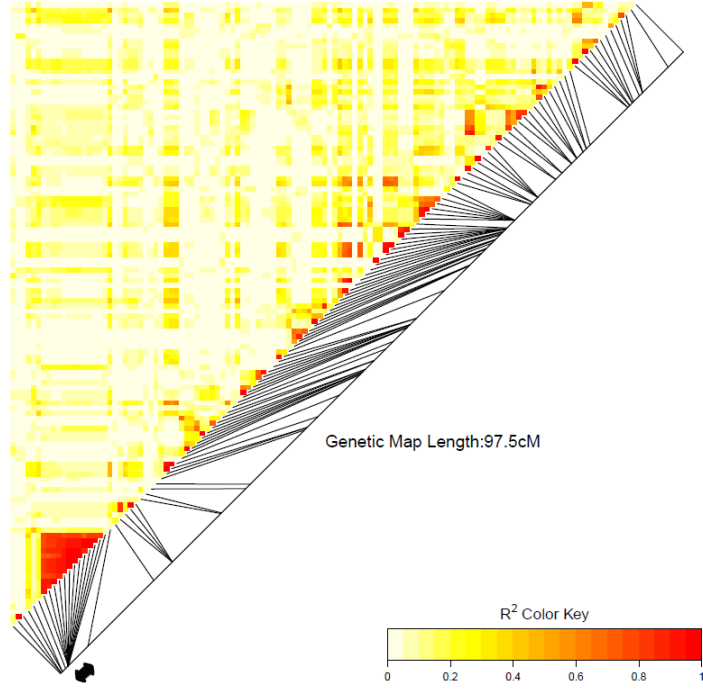

WOSR collection

C8

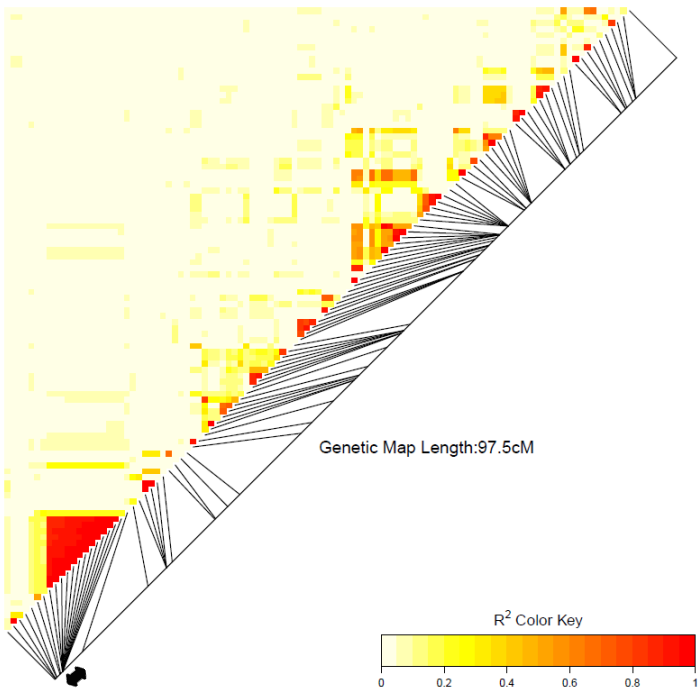

« 00 » WOSR collection

C8

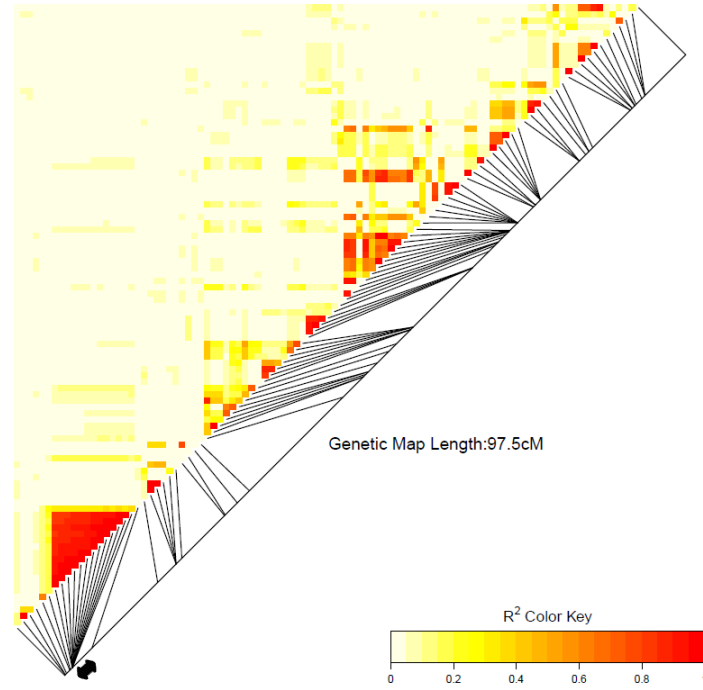

Whole collection

C9

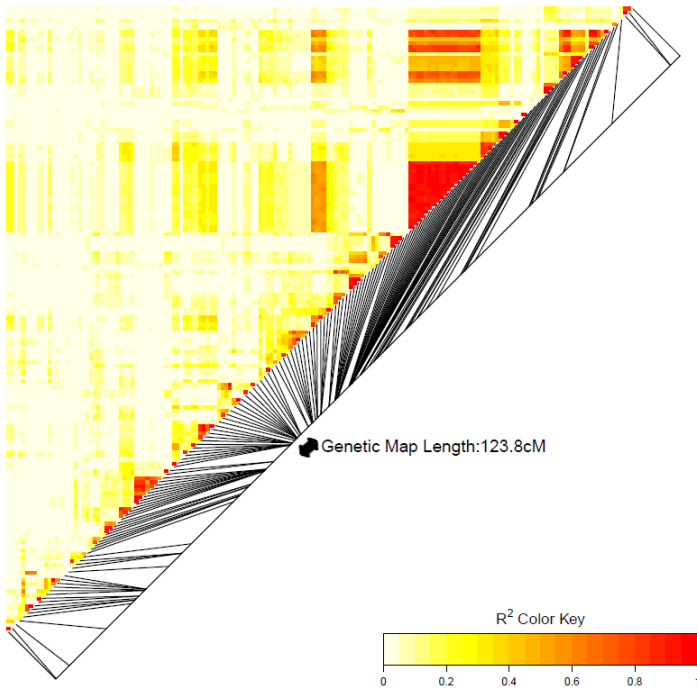

SOSR collection

C9

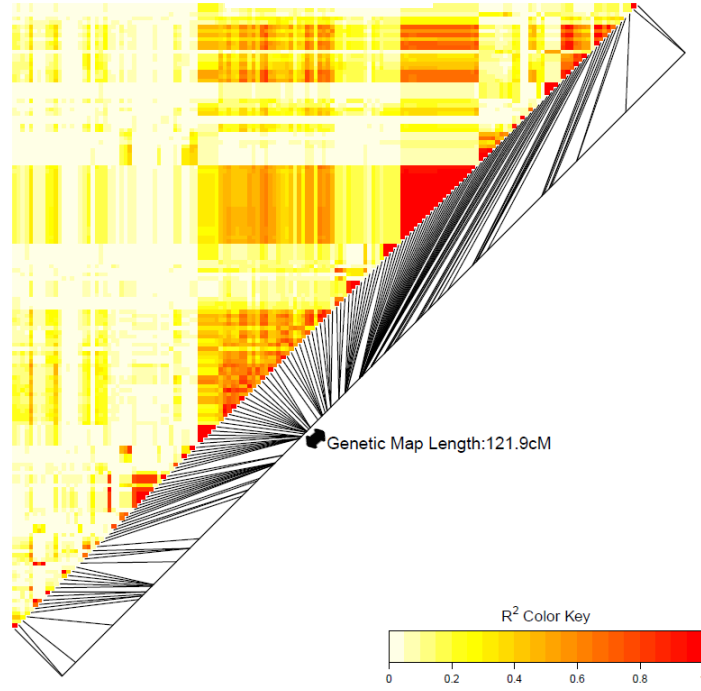

WOSR collection

C9

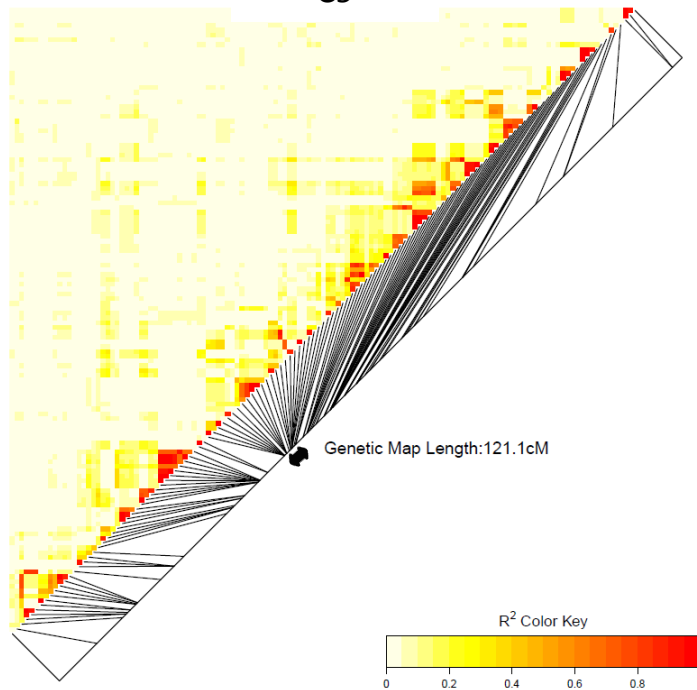

« 00 » WOSR collection

C9

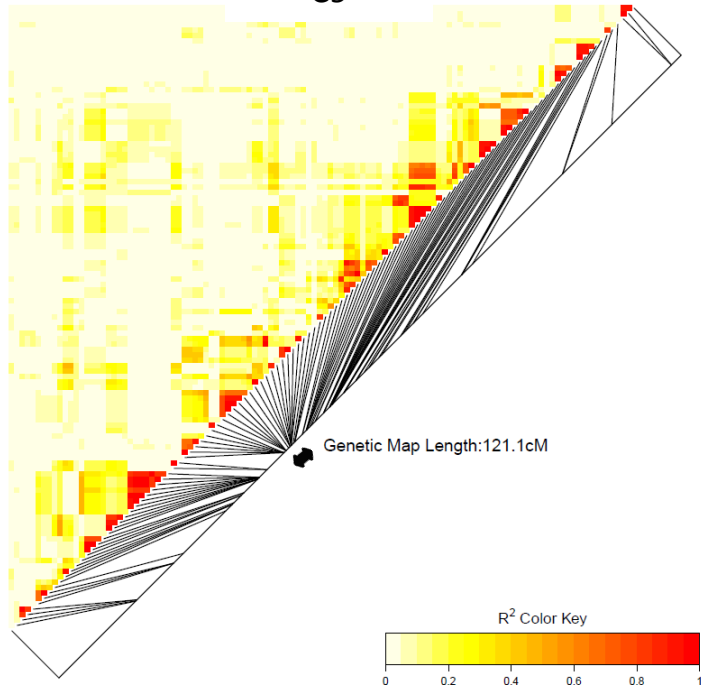

Supplement: 1471-2164-14-120-S9.pdf [file 1471-2164-14-120-S9.pdf]
